# Supplementary material for: A catalyst-free, efficient green MCR protocol for access to functionalized γ-carbolines in water
Source: Royal Society of Chemistry journal article supplement (doi:10.1039/c5ra08422a), 2015-01-01

## Supporting Information

### **Catalyst-free, an efficient green MCR protocol for the access to functionalized $\gamma$ -carbolines in water**

**Anuradha Dagar, Soumen Biswas and Sampak Samanta<sup>\*,a</sup>**

<sup>a</sup>Indian Institute of Technology Indore, Department of Chemistry, Indore, 452017, Madhya Pradesh, India

**Copies of  $^1\text{H}$  and  $^{13}\text{C}$  NMR Spectra: (Page 2-51)**

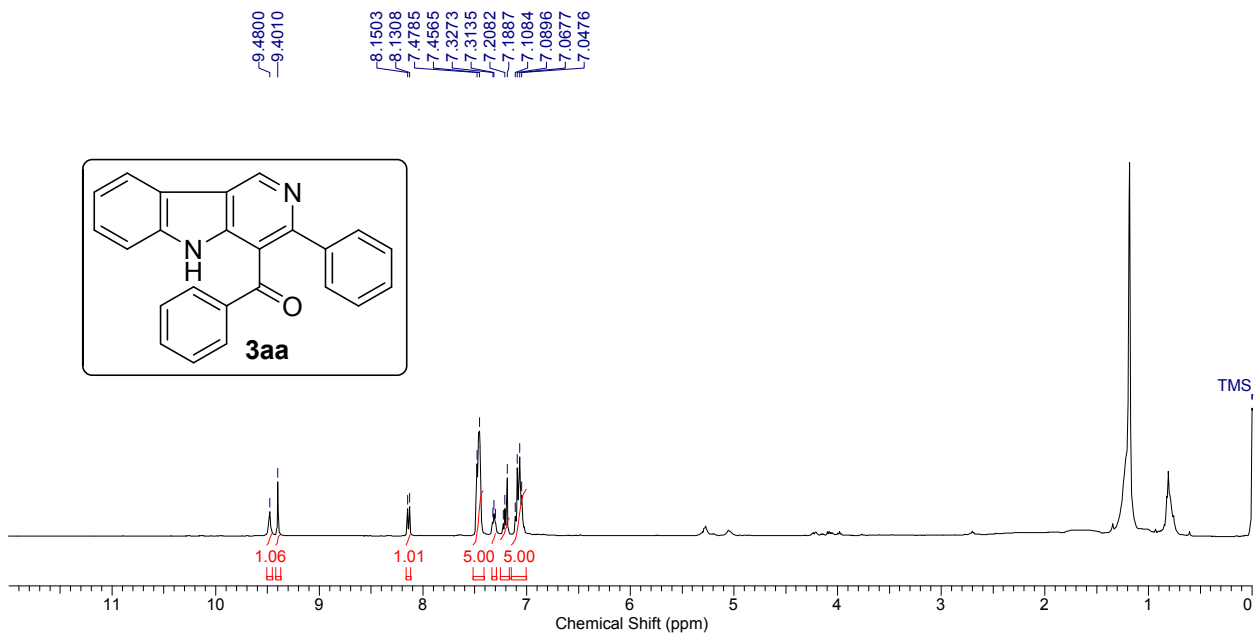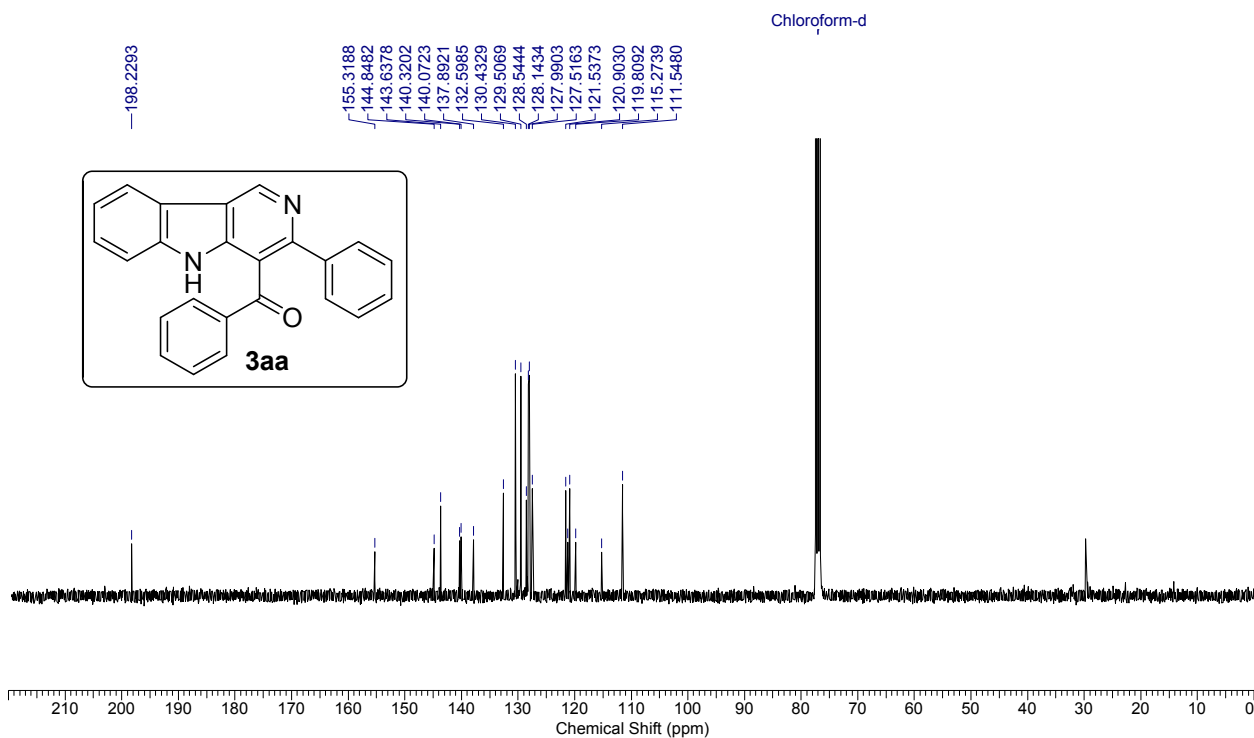

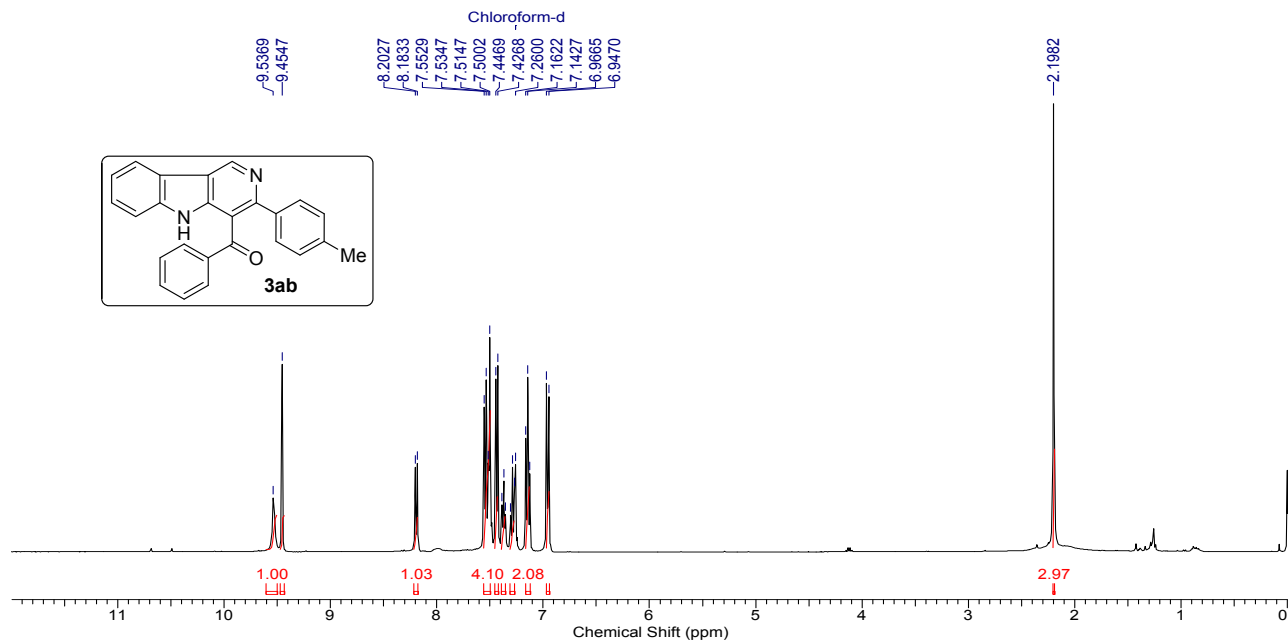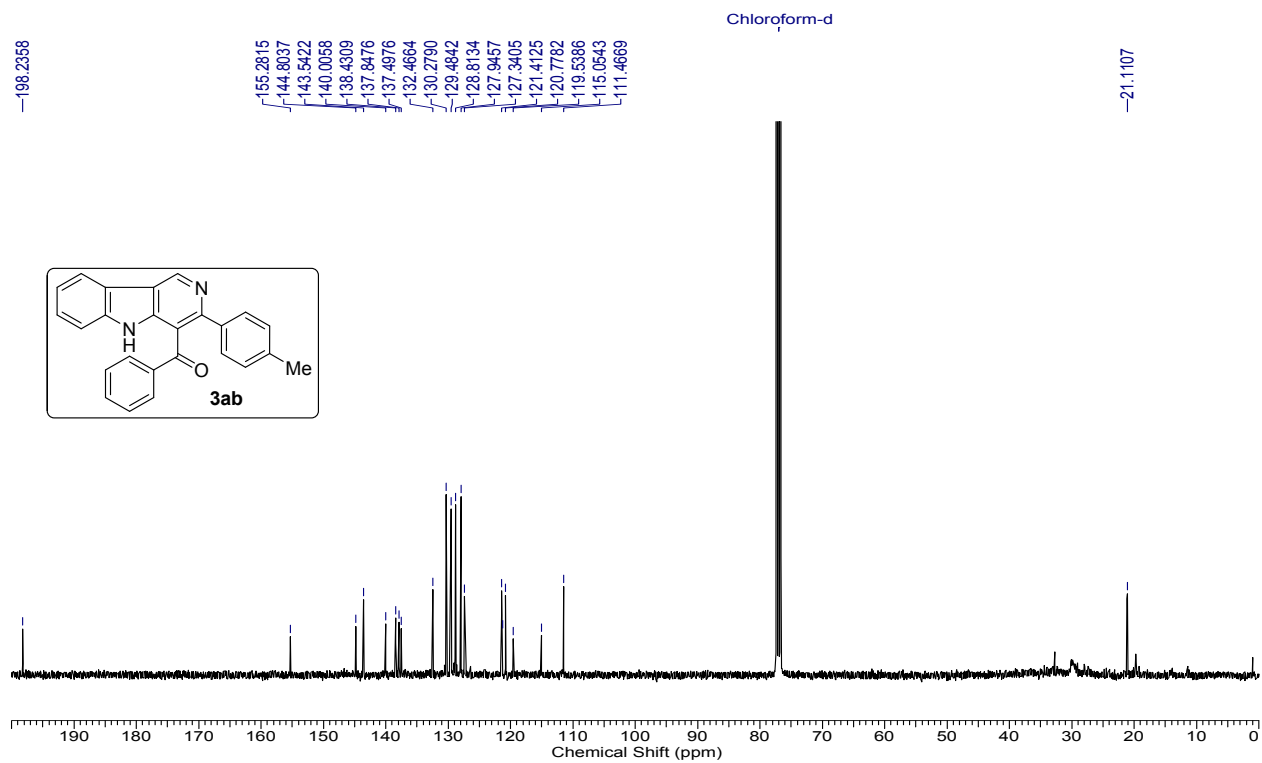

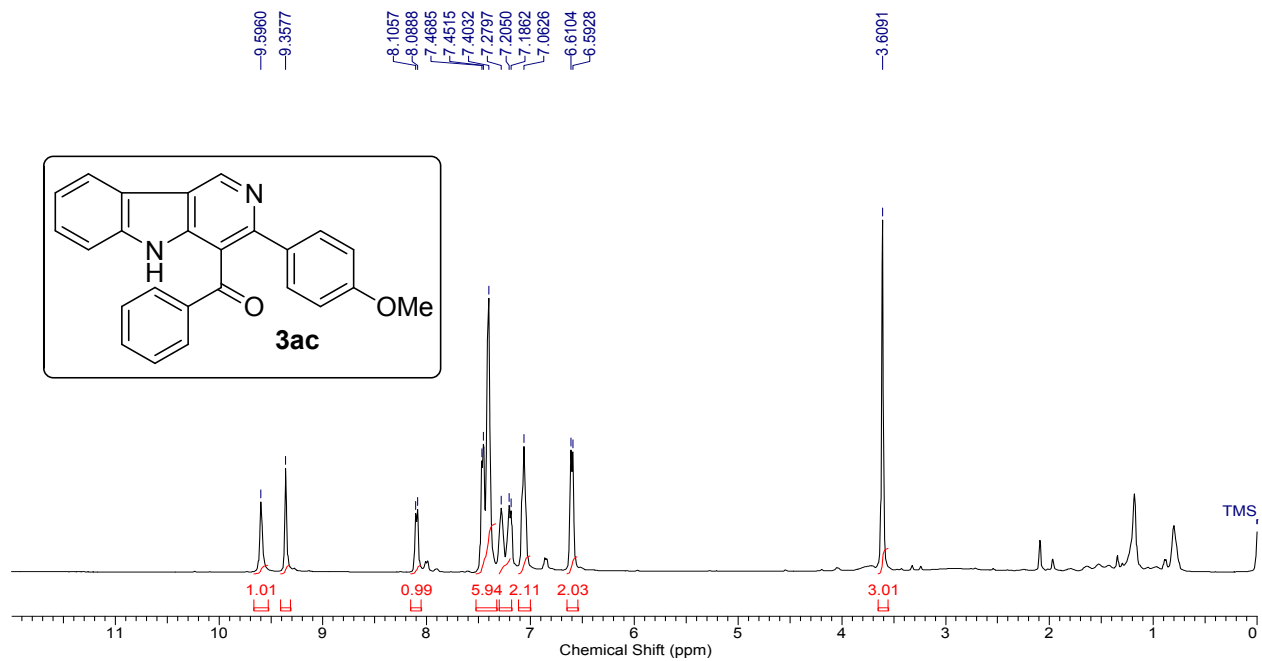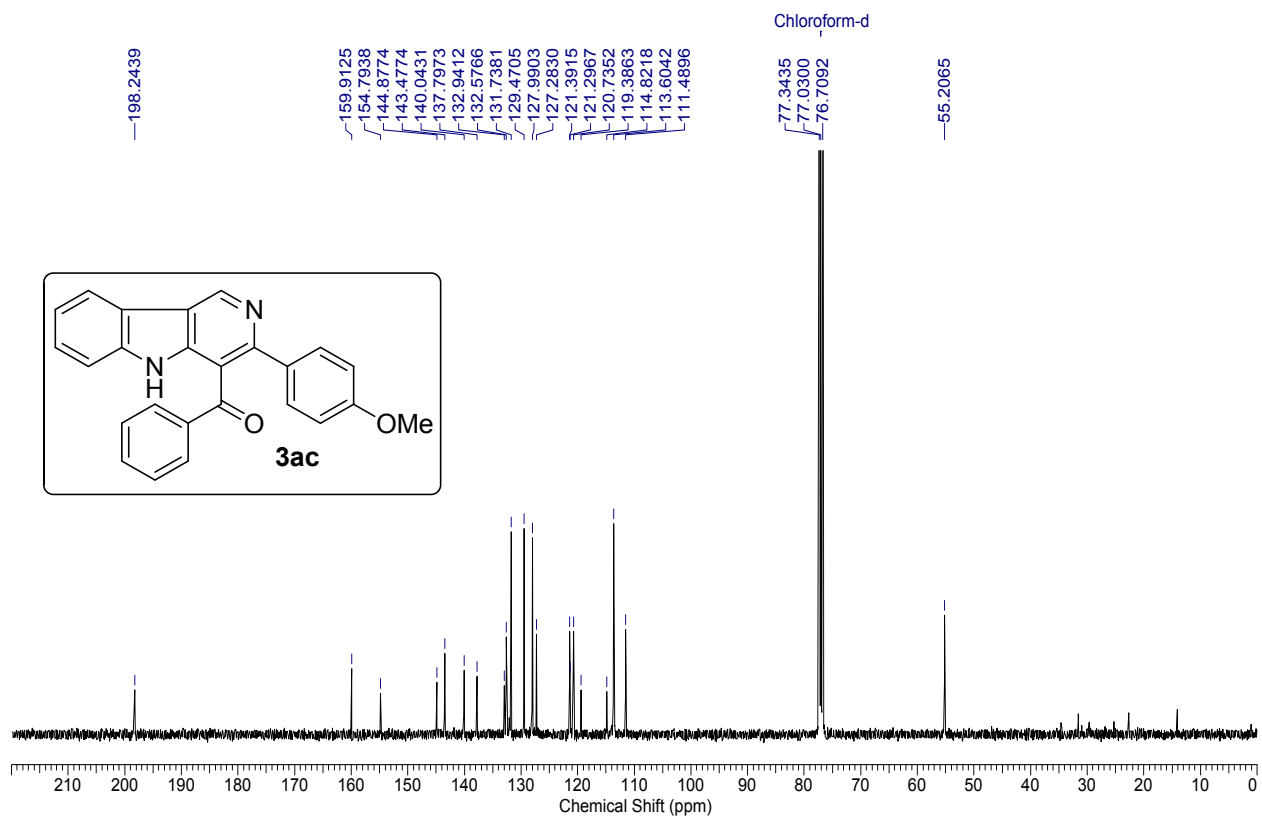

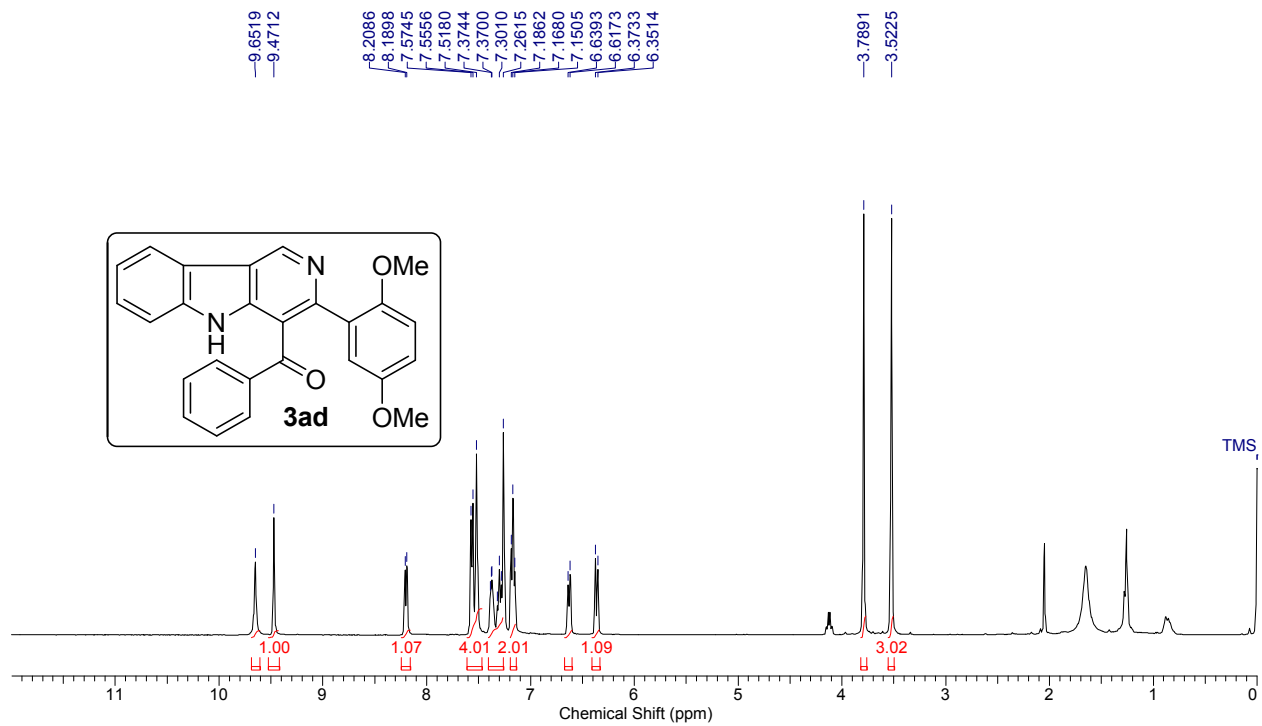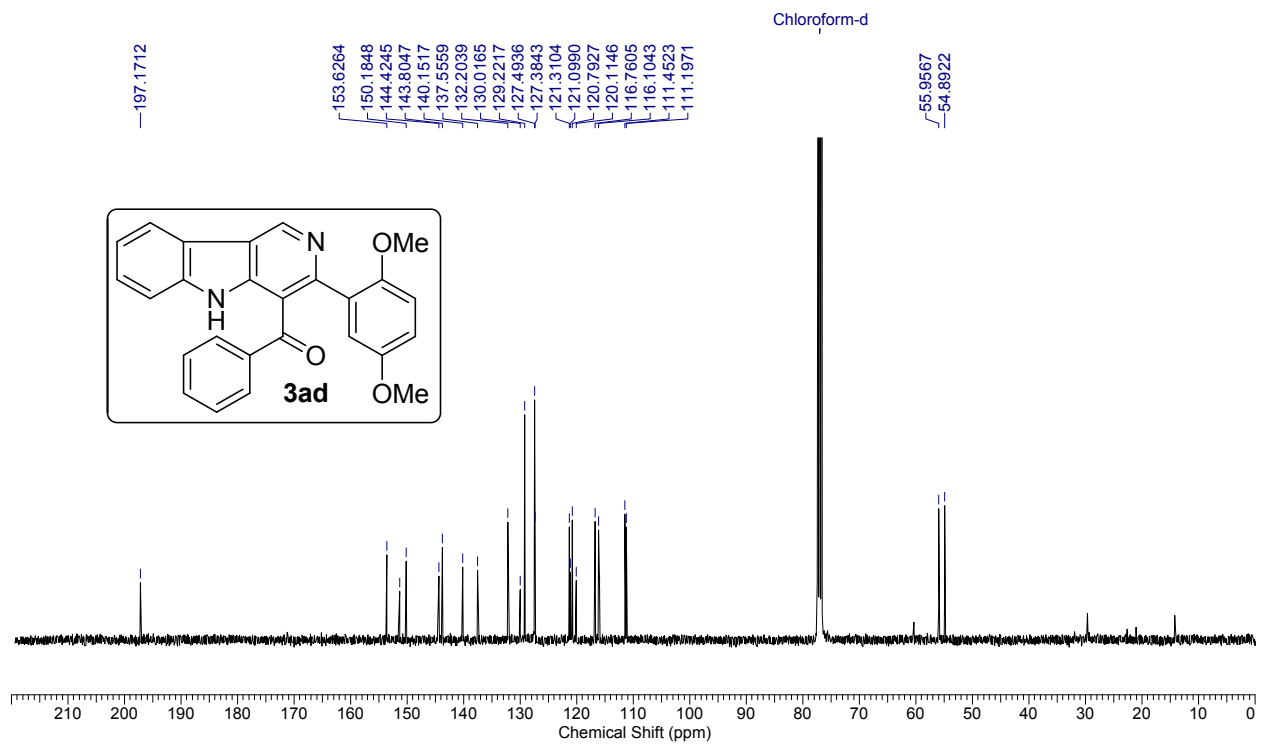

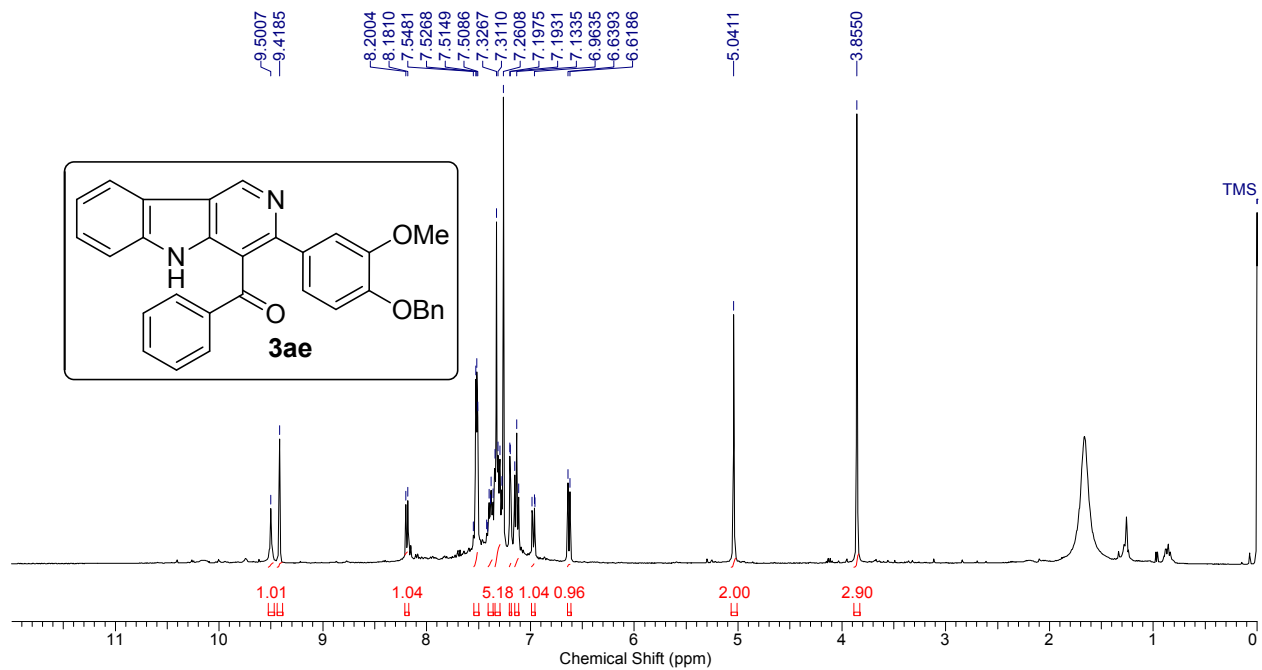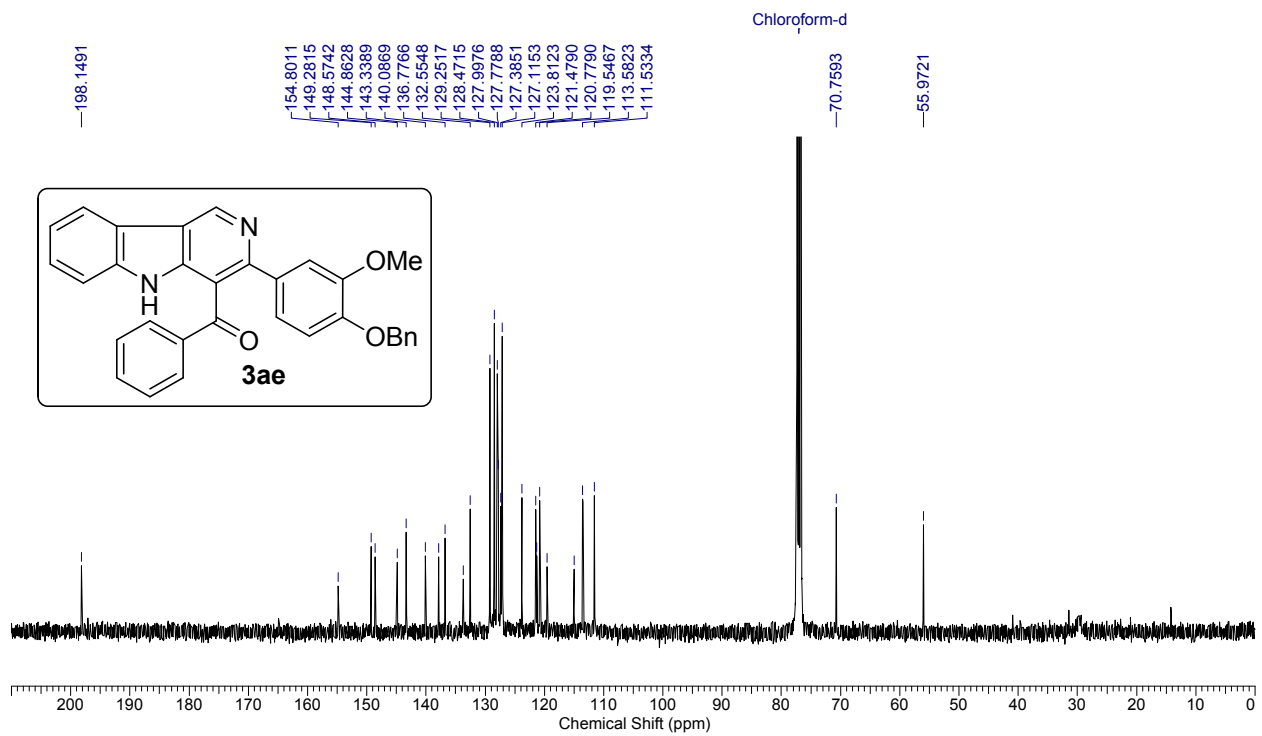

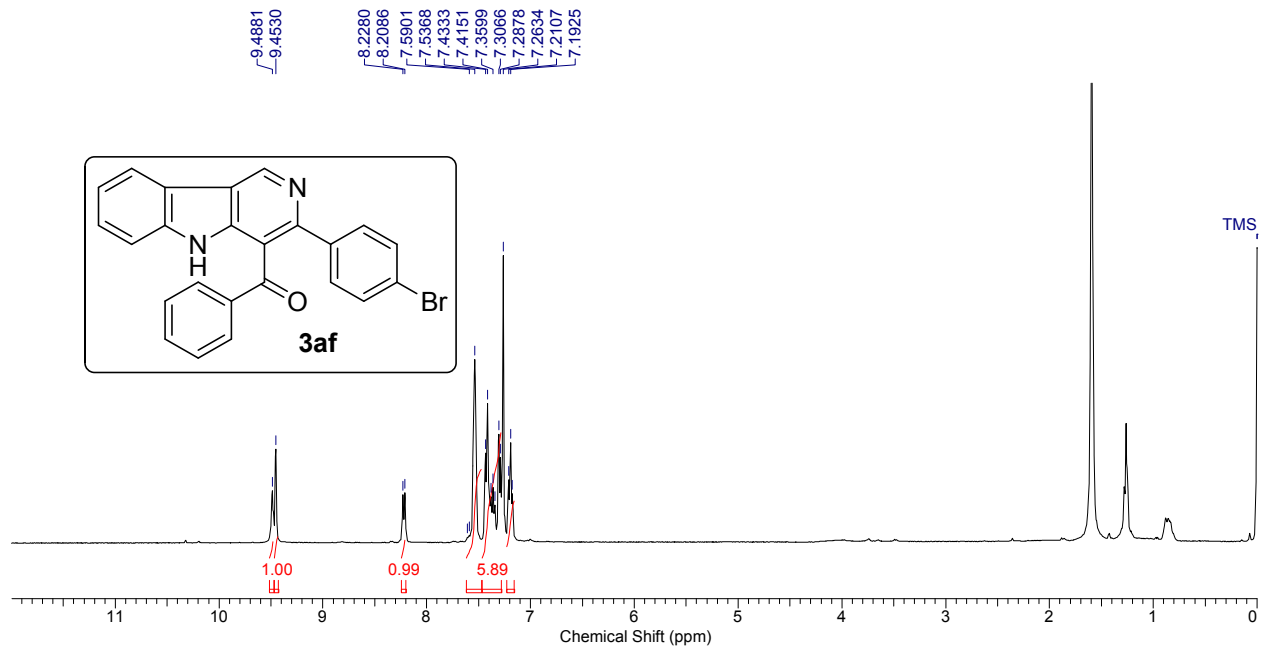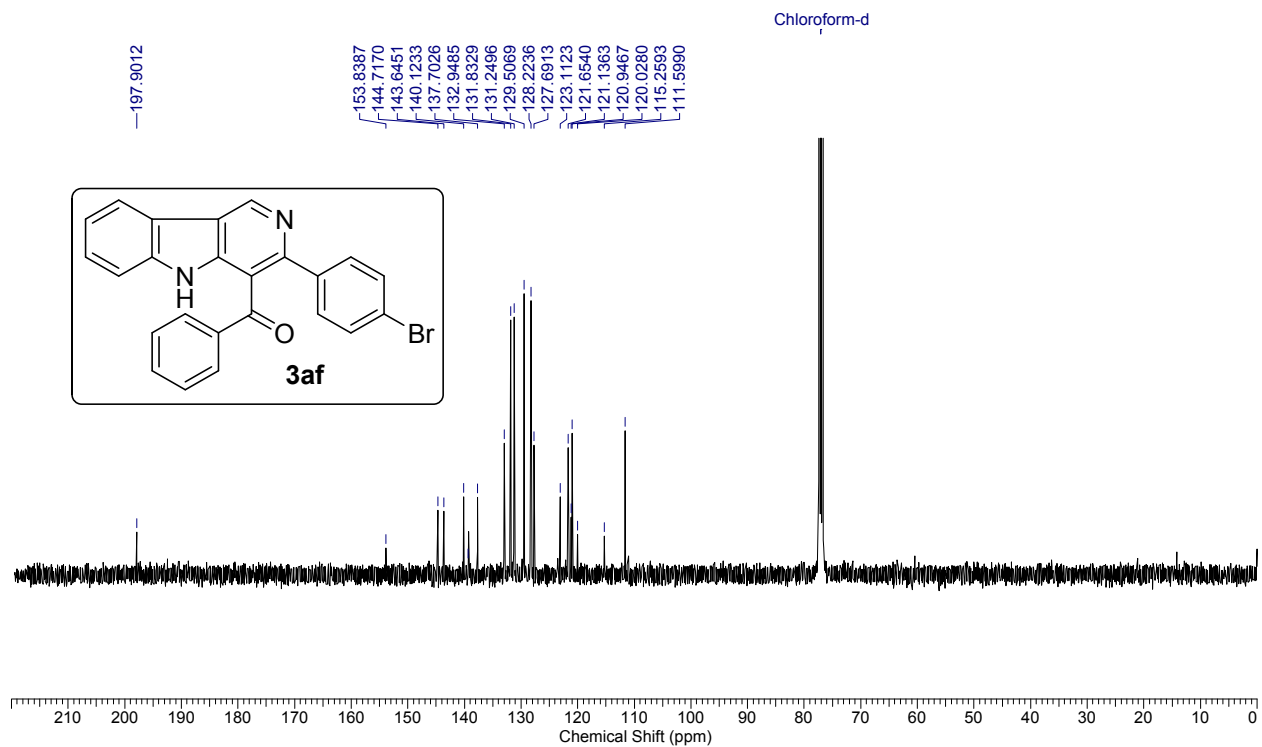

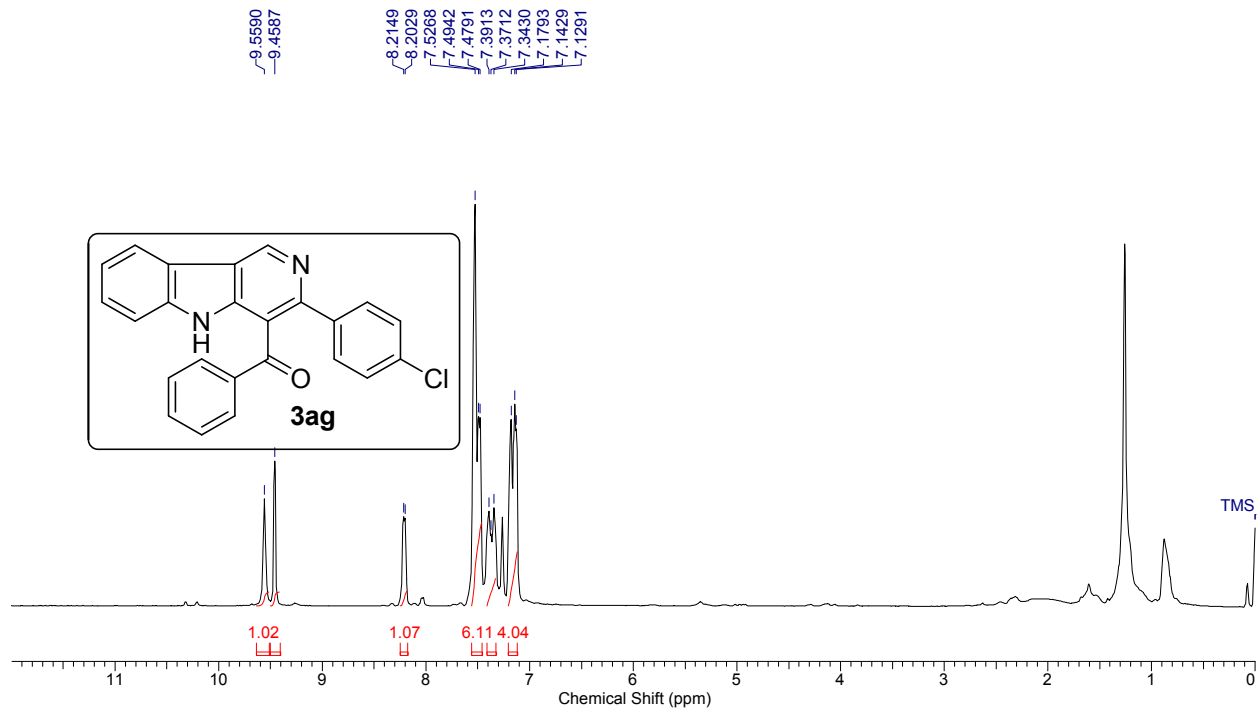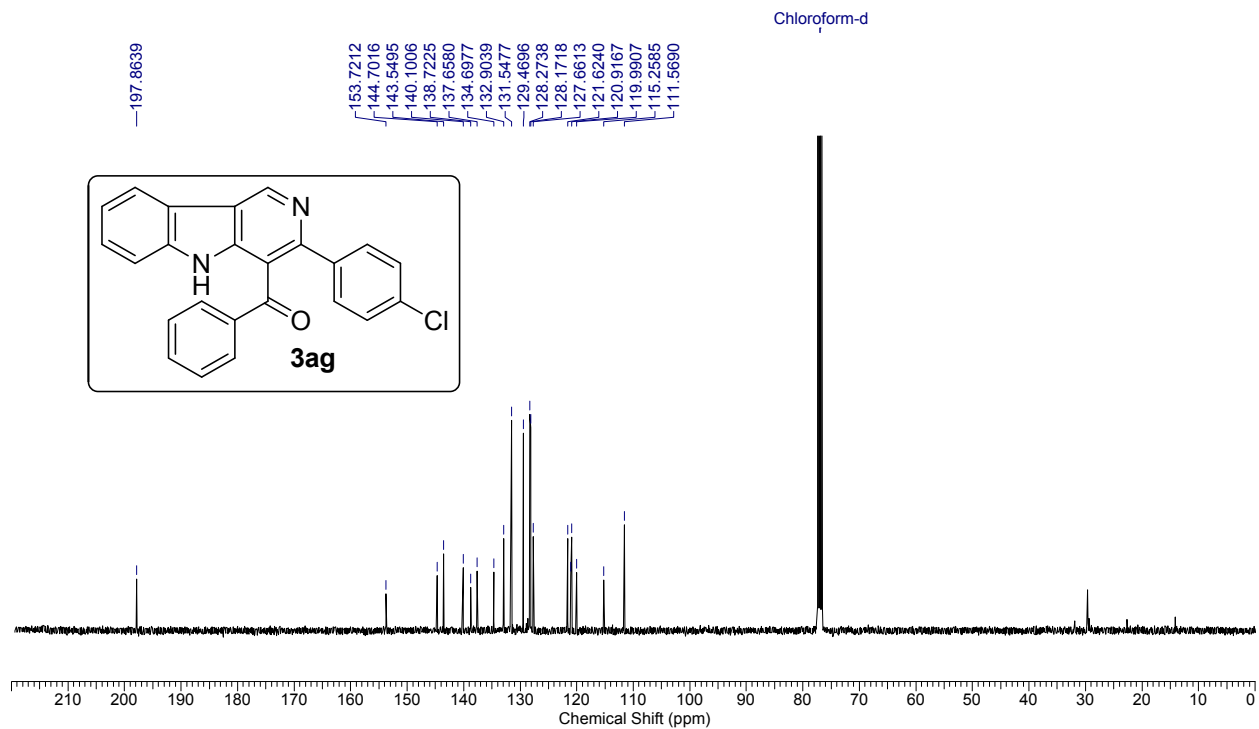



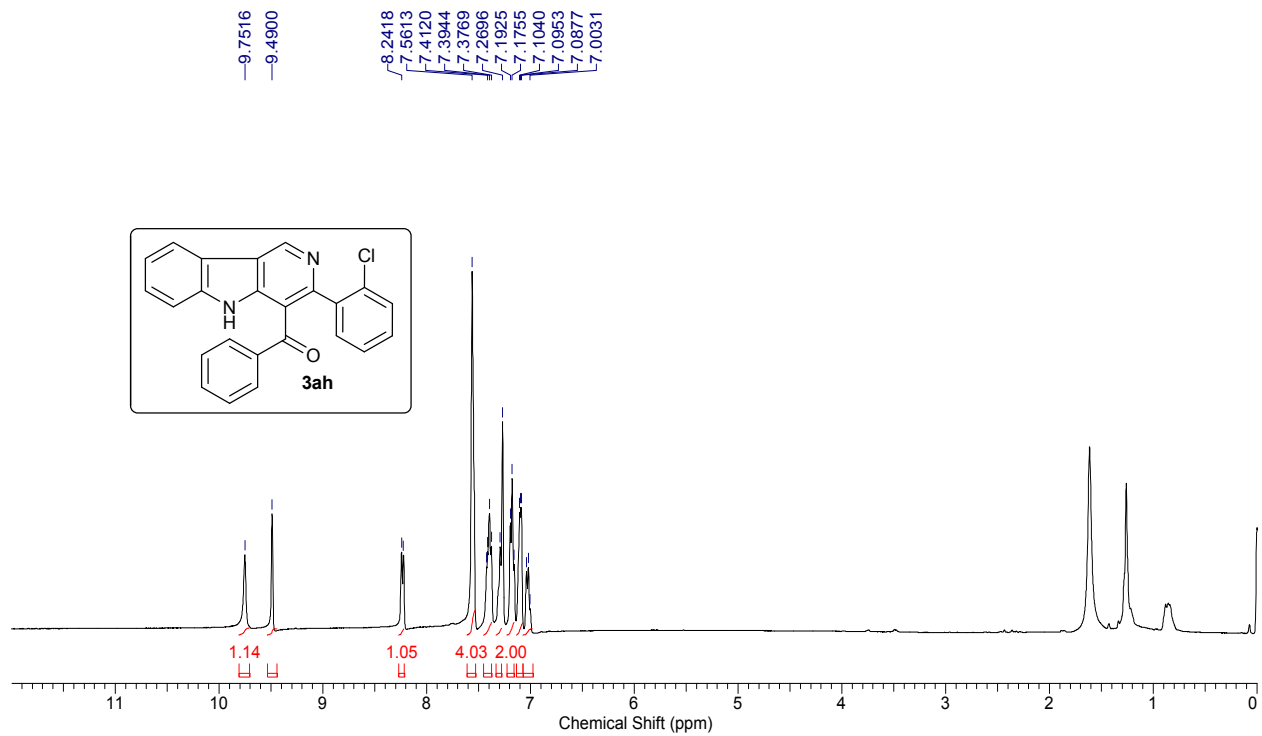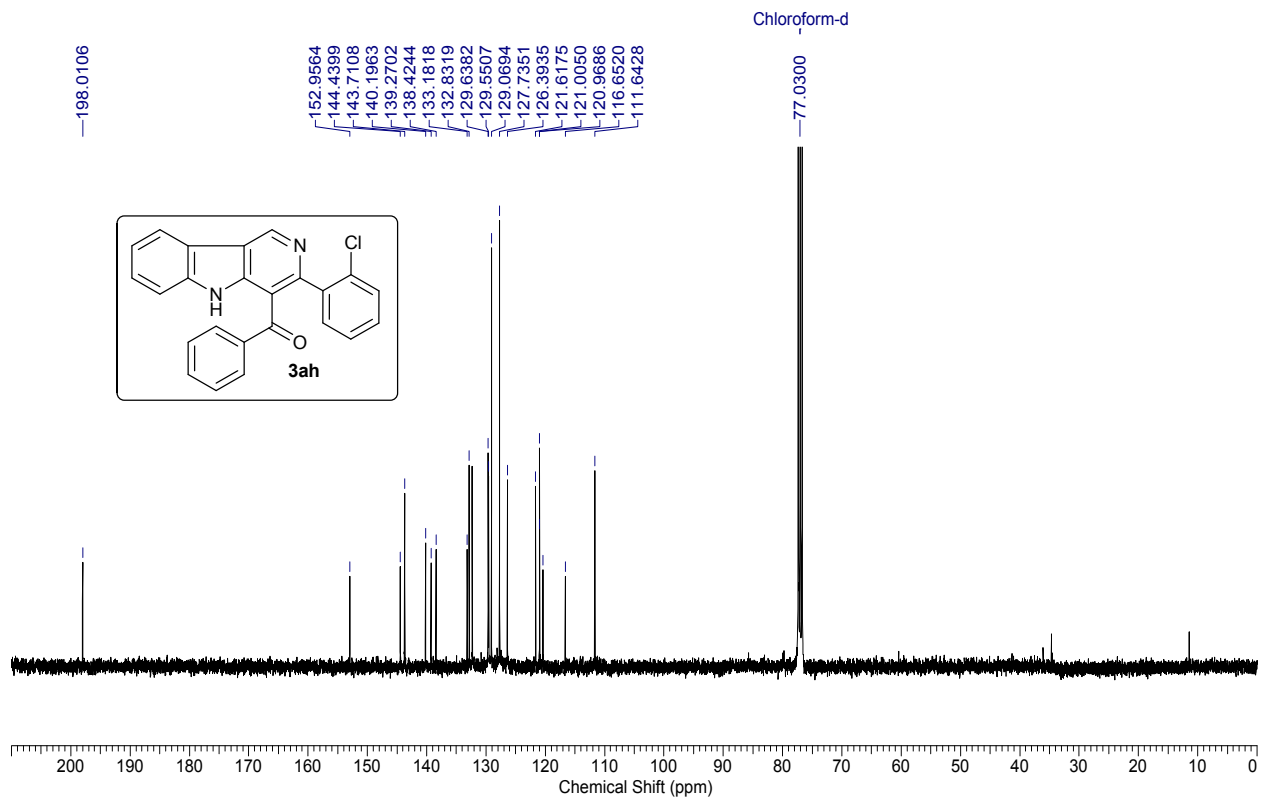

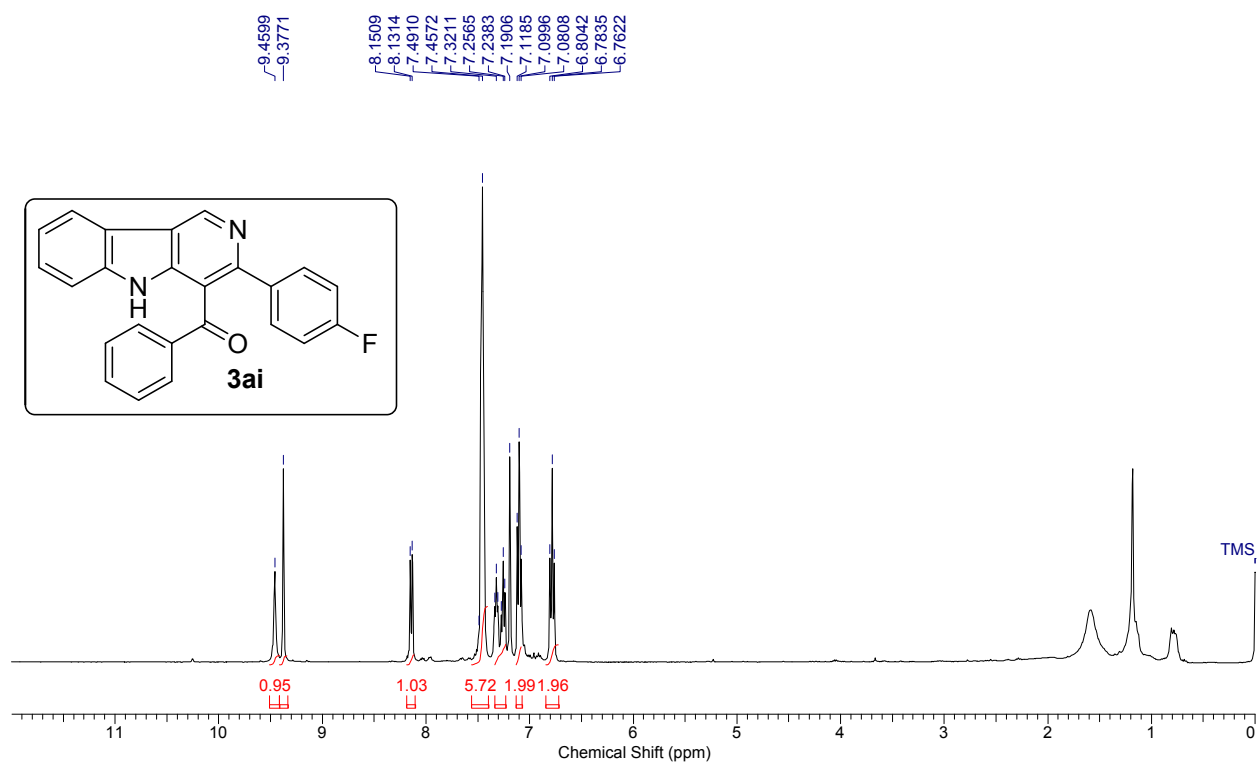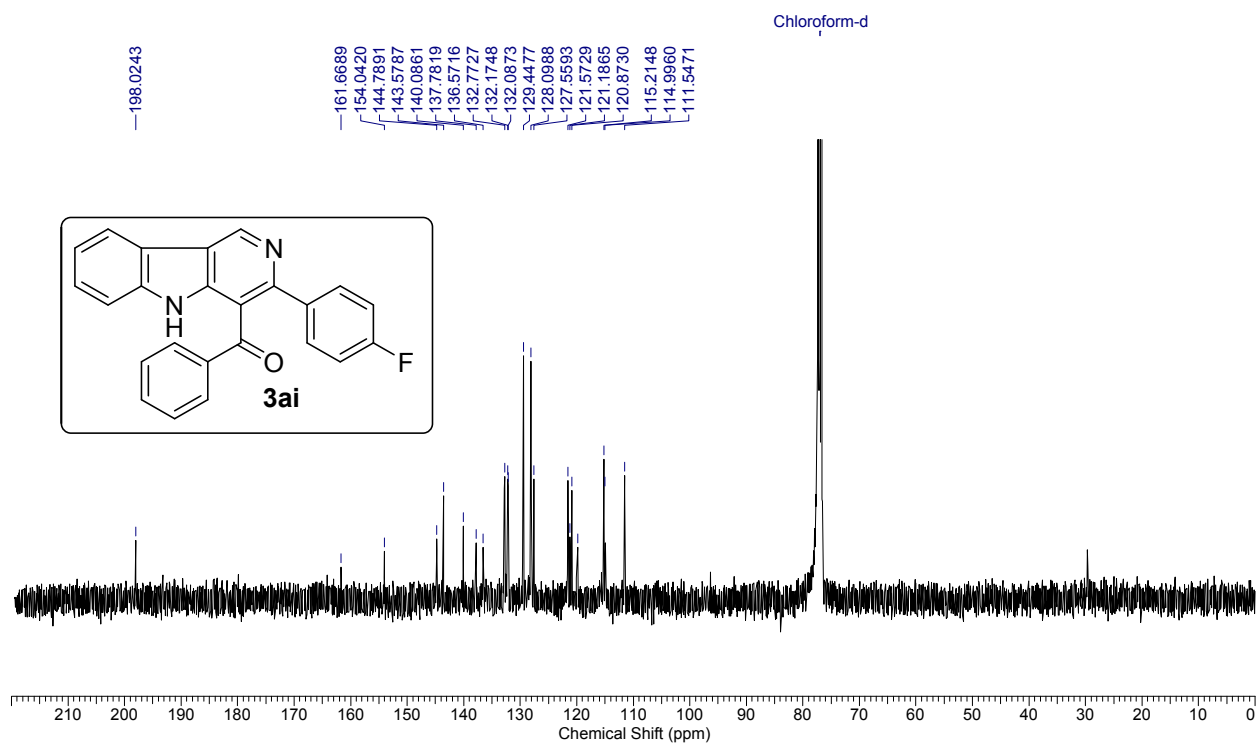

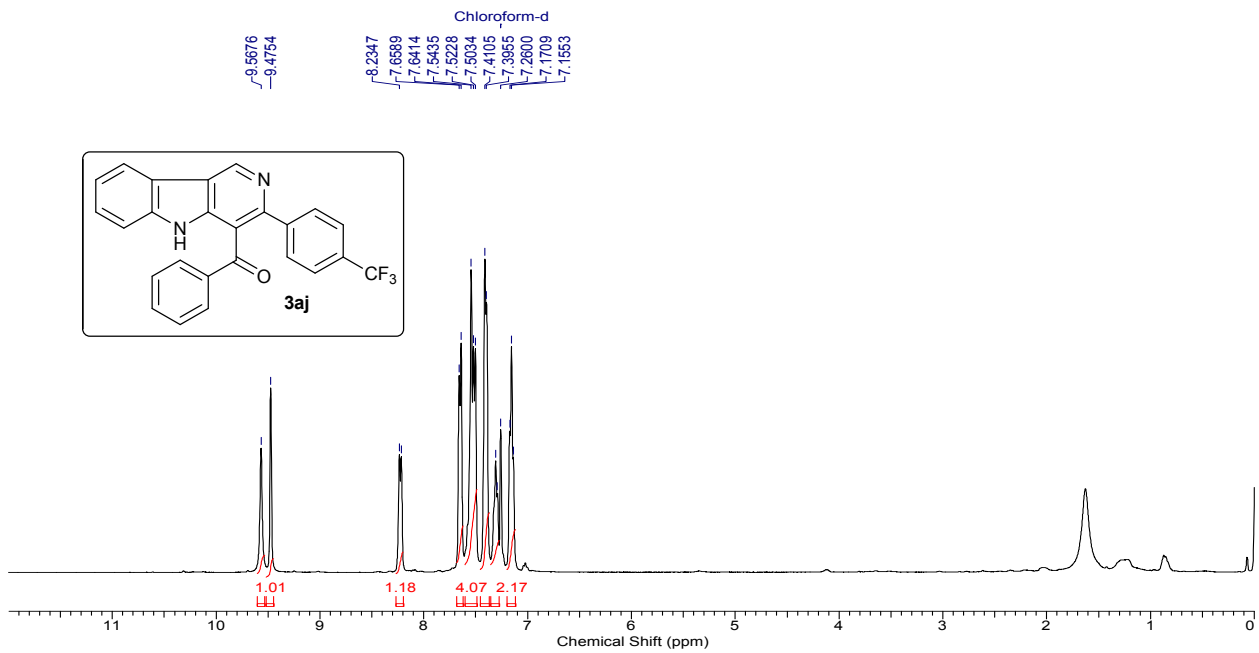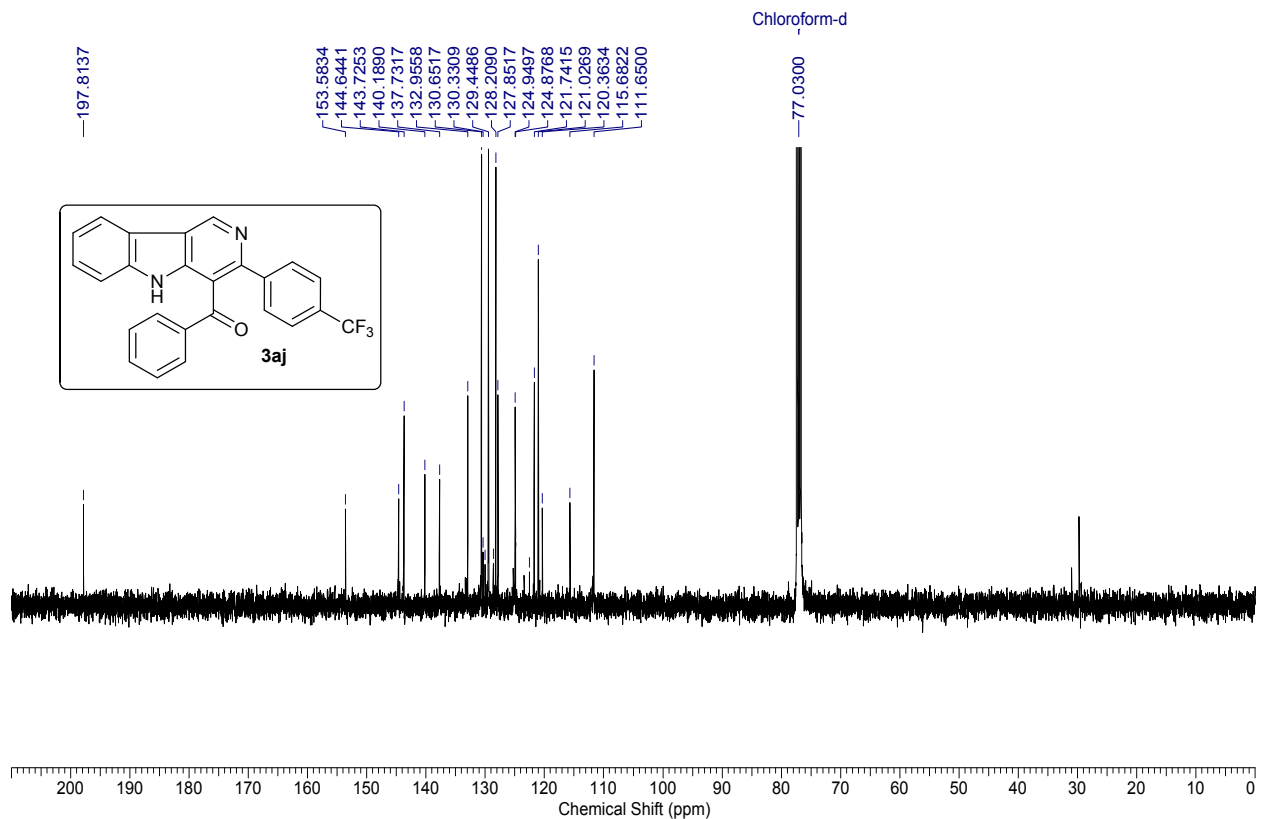

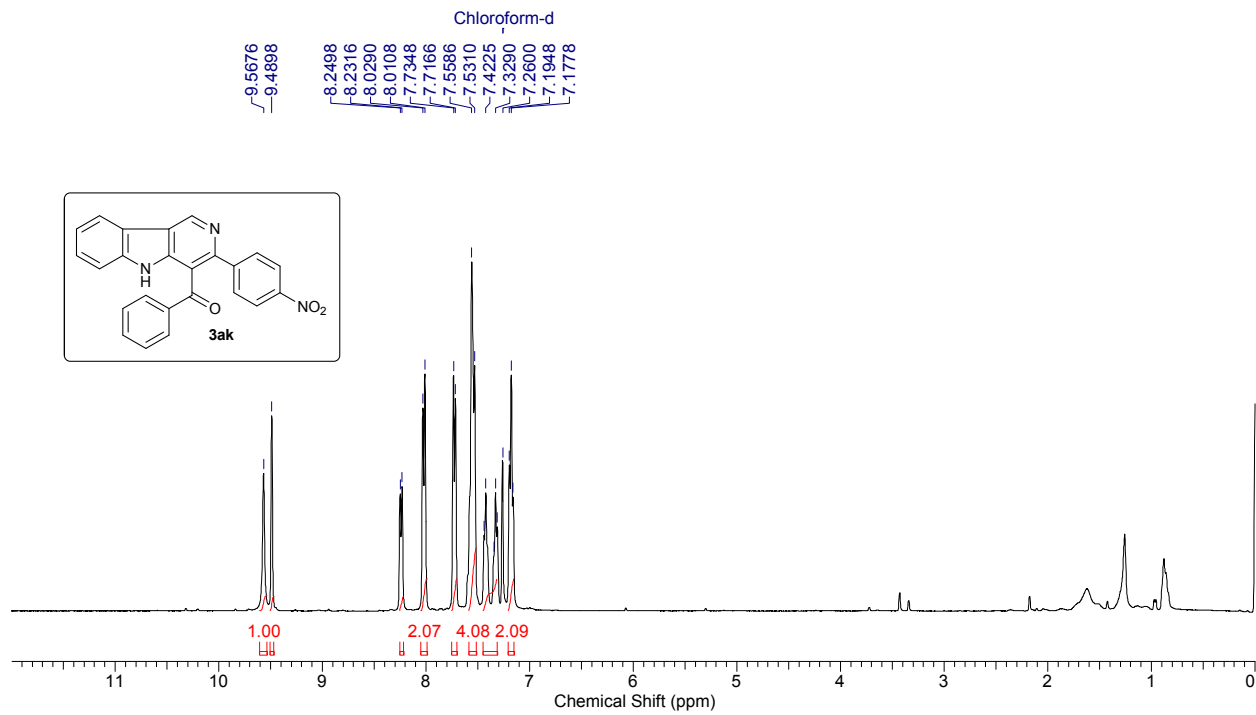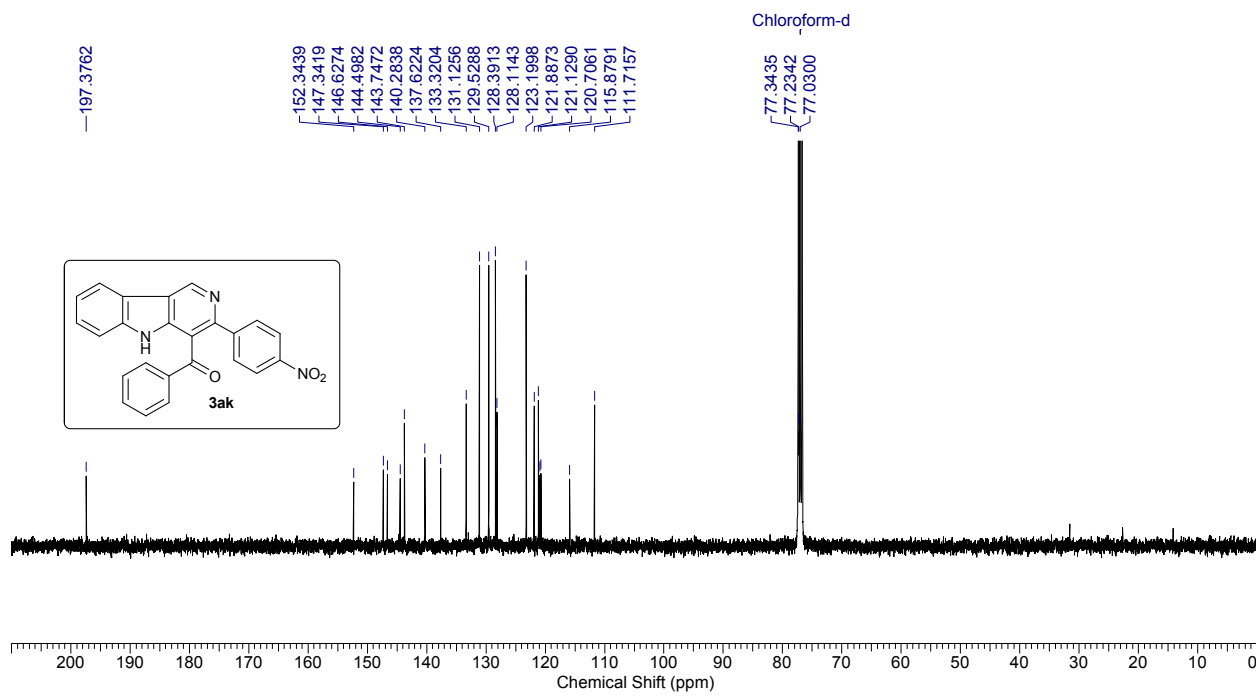

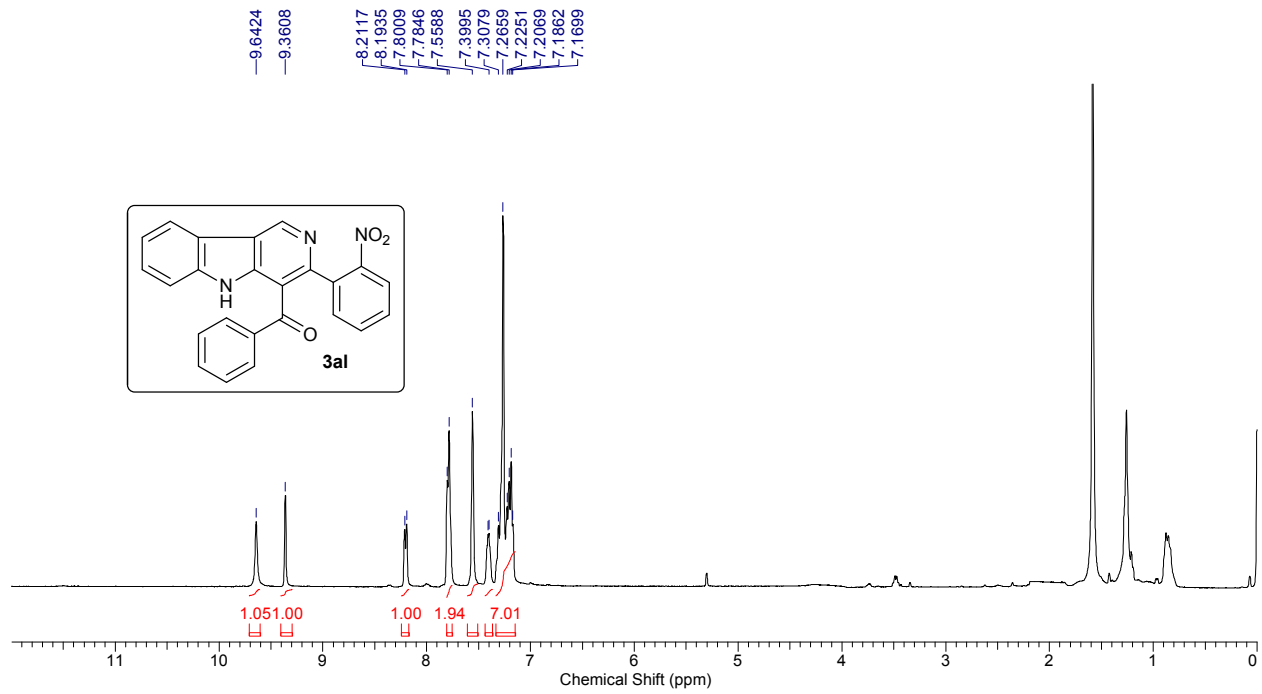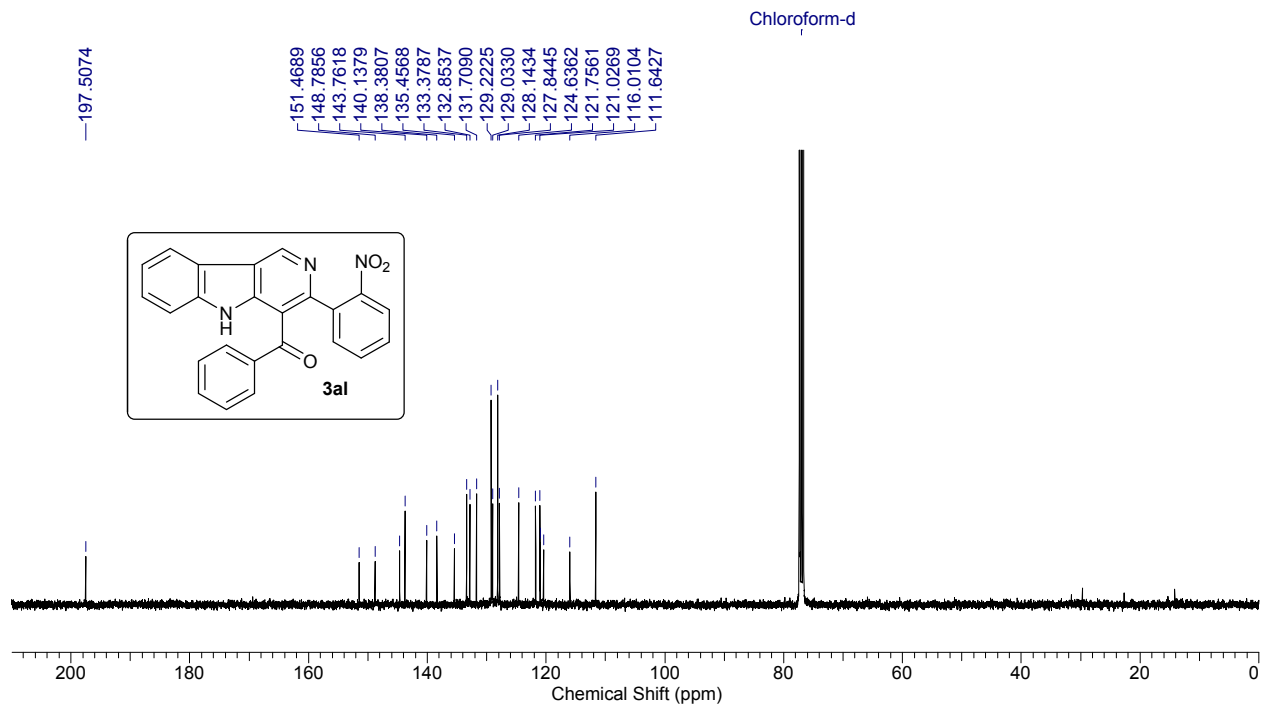

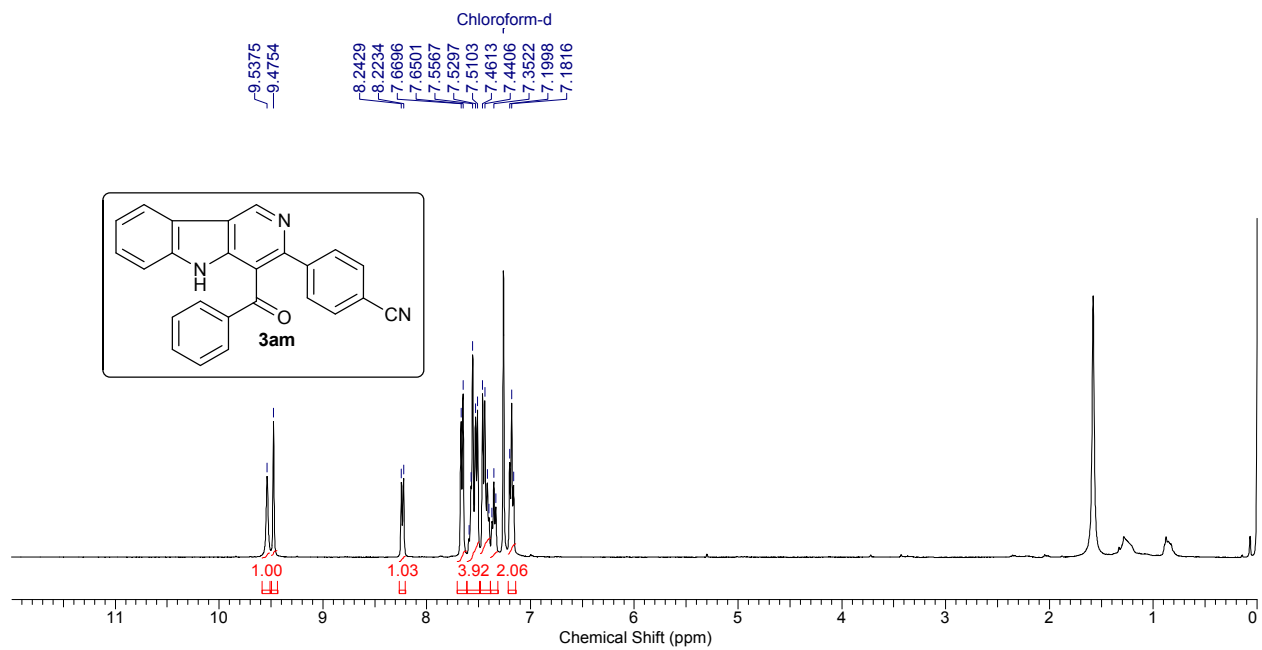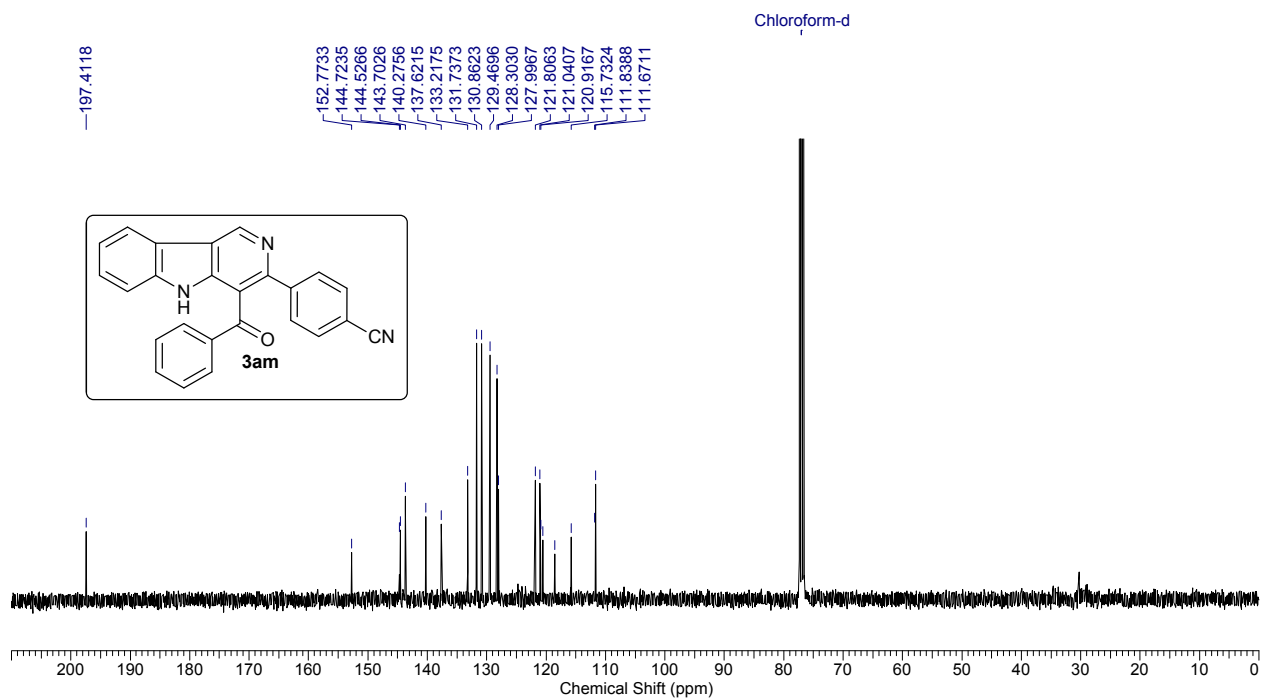

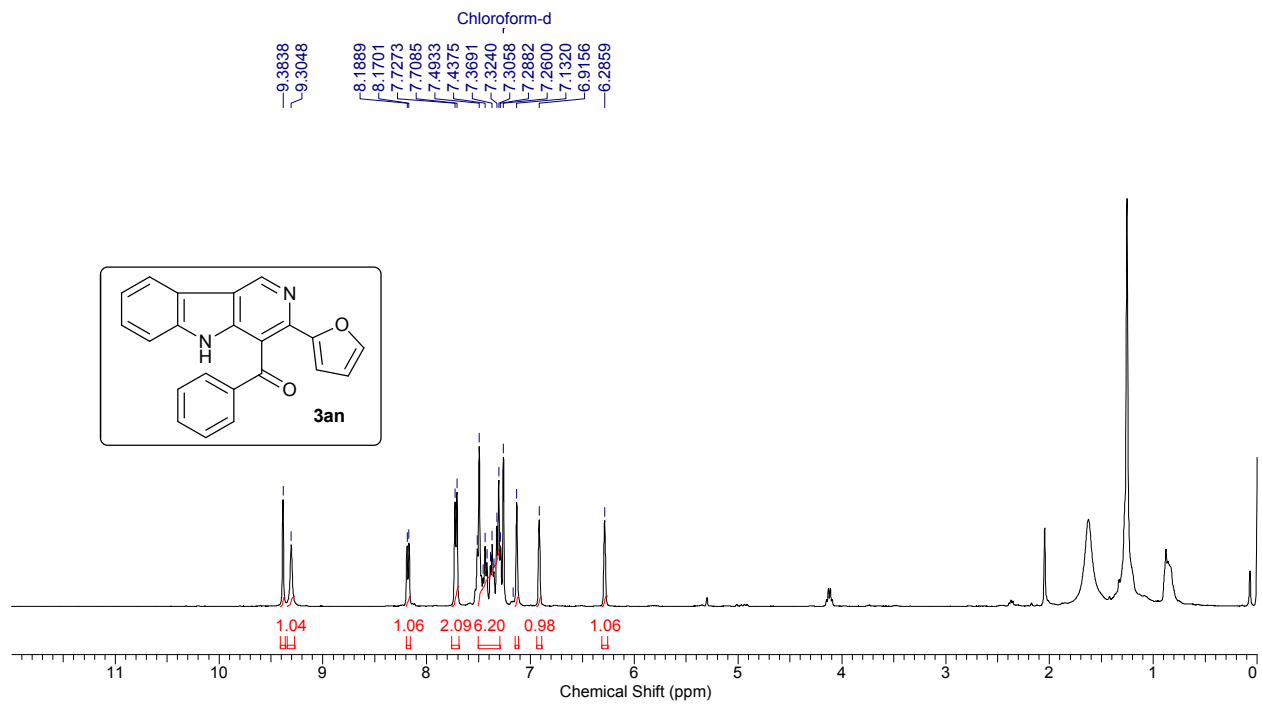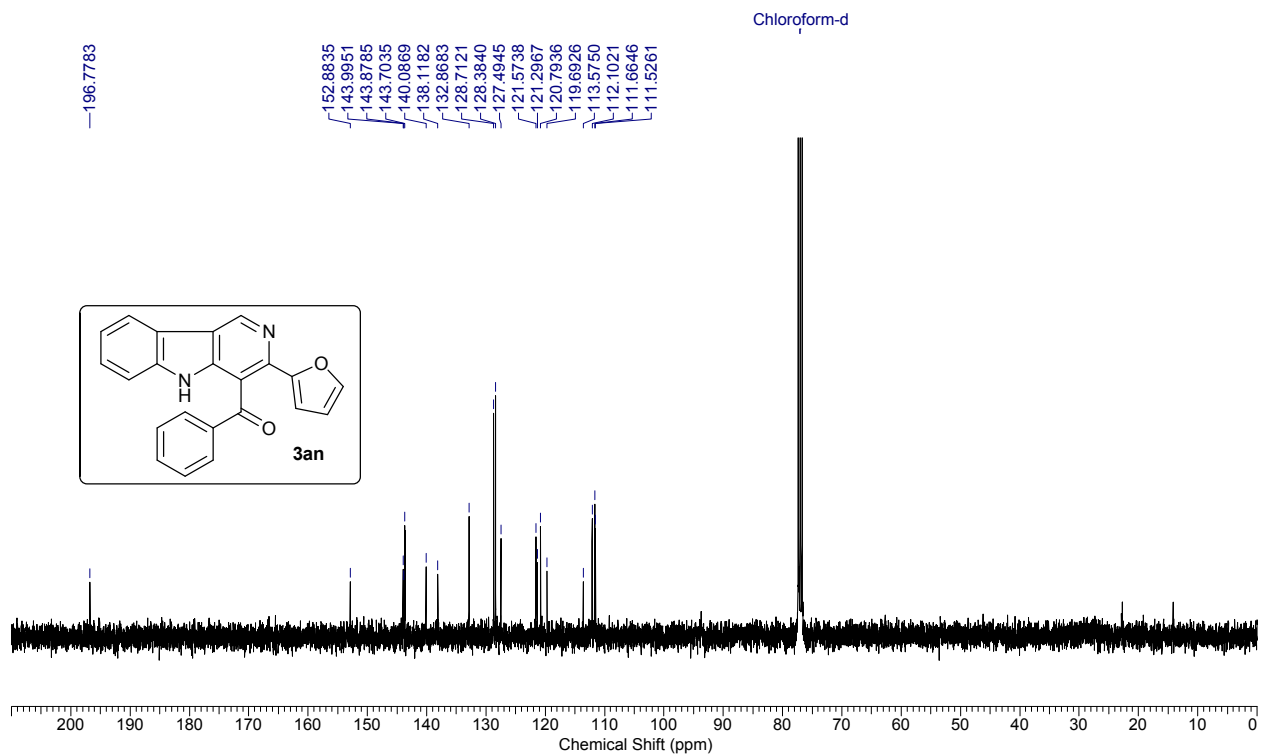

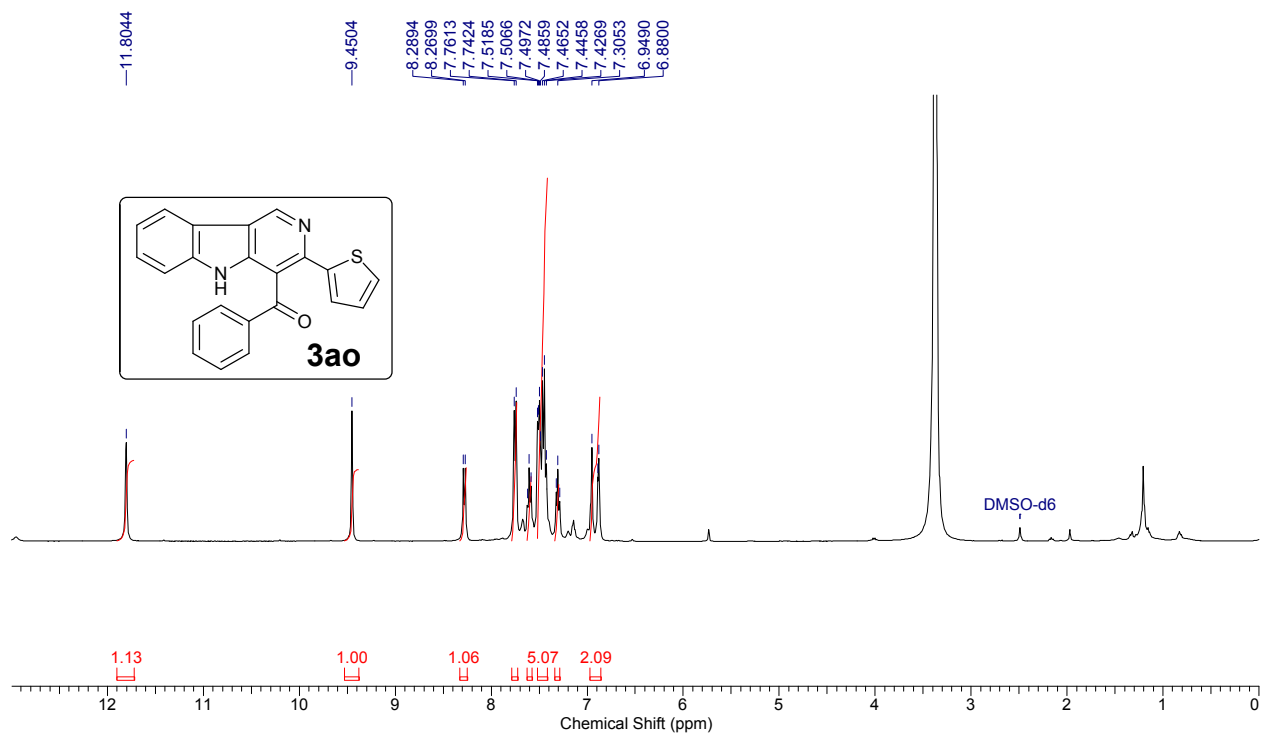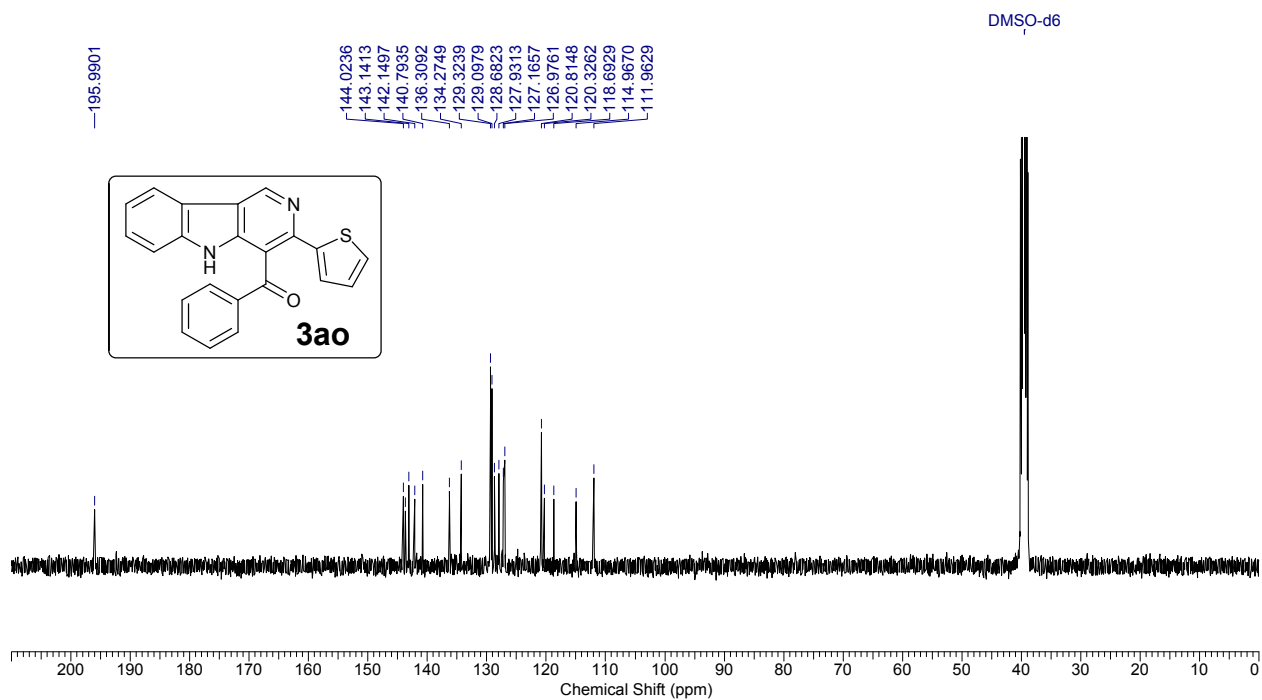



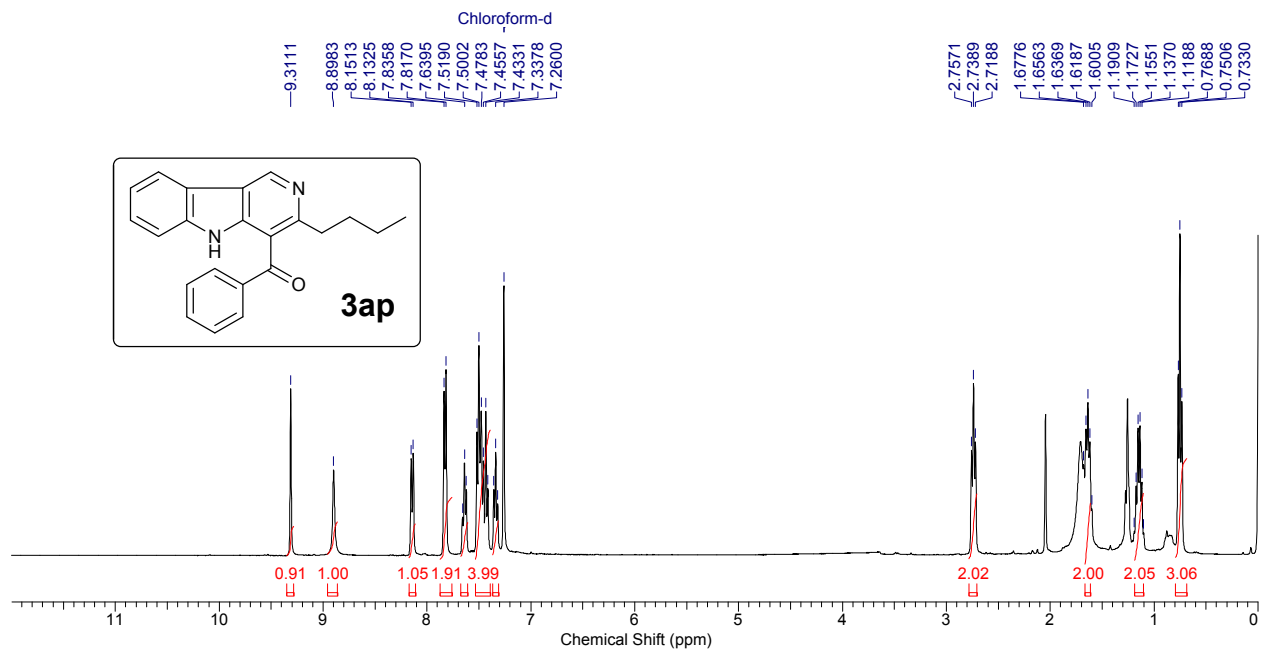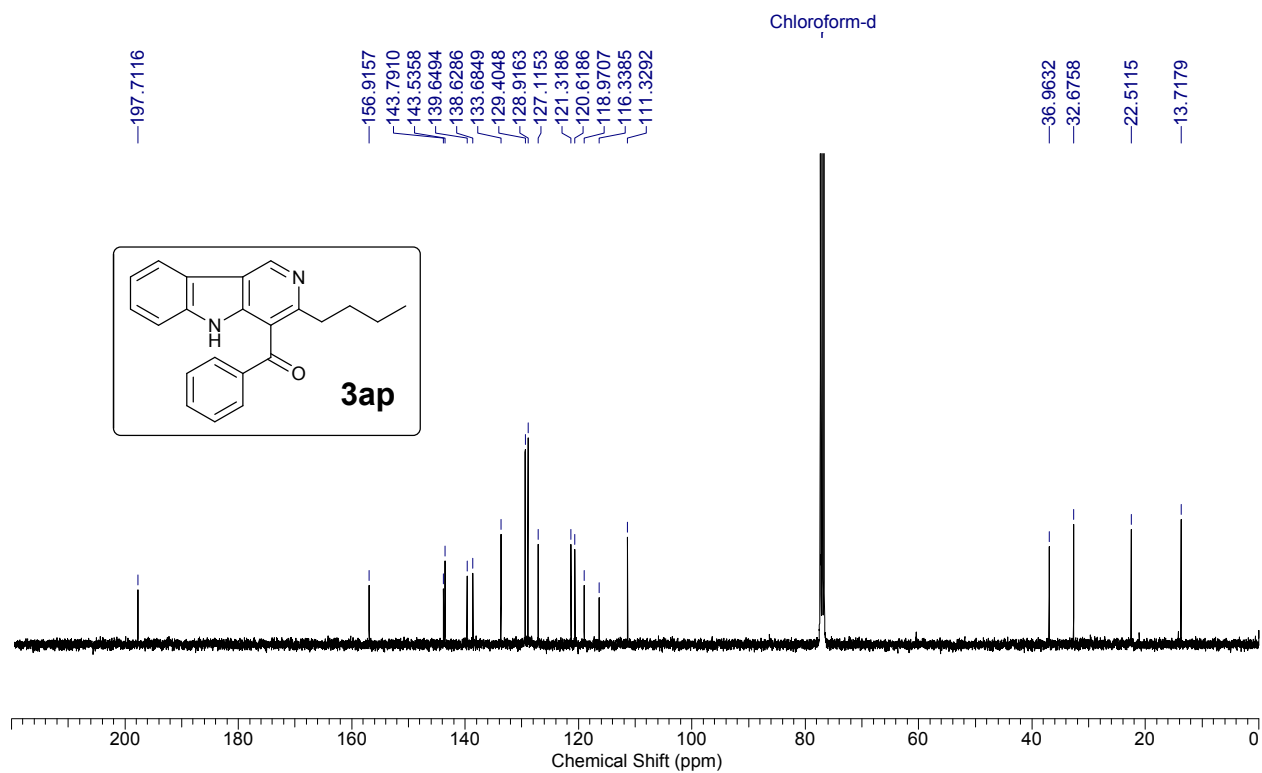

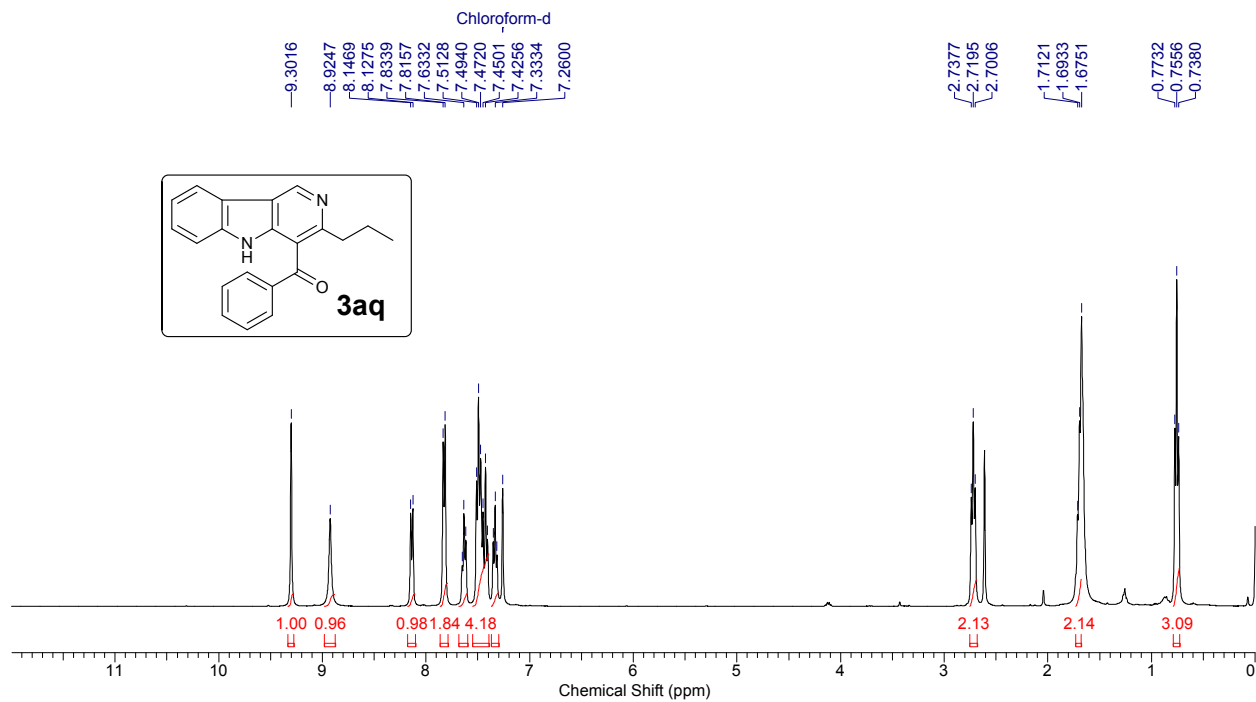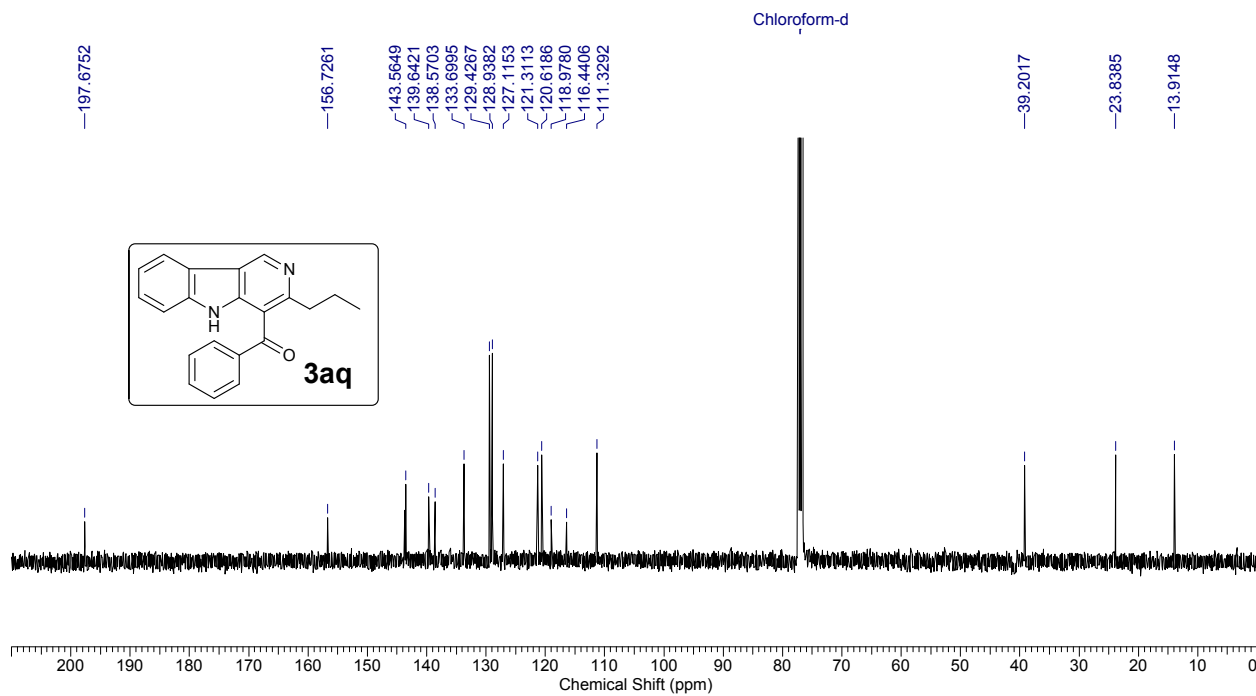

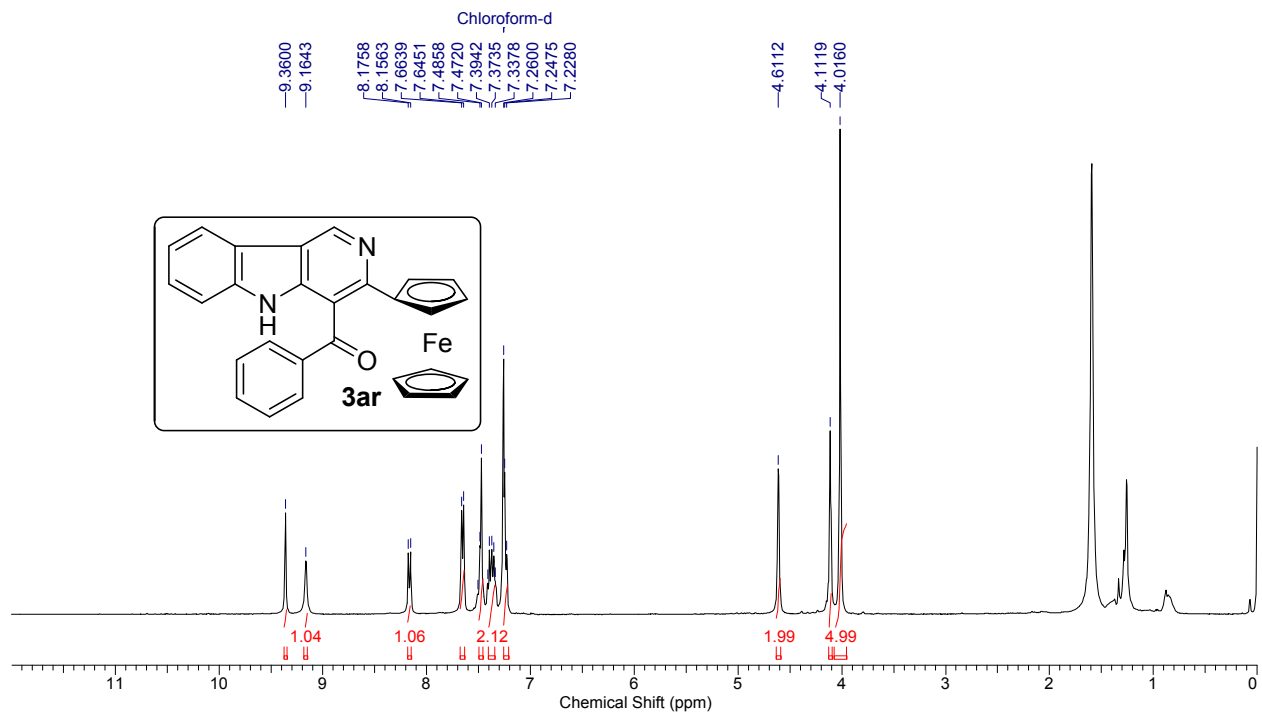

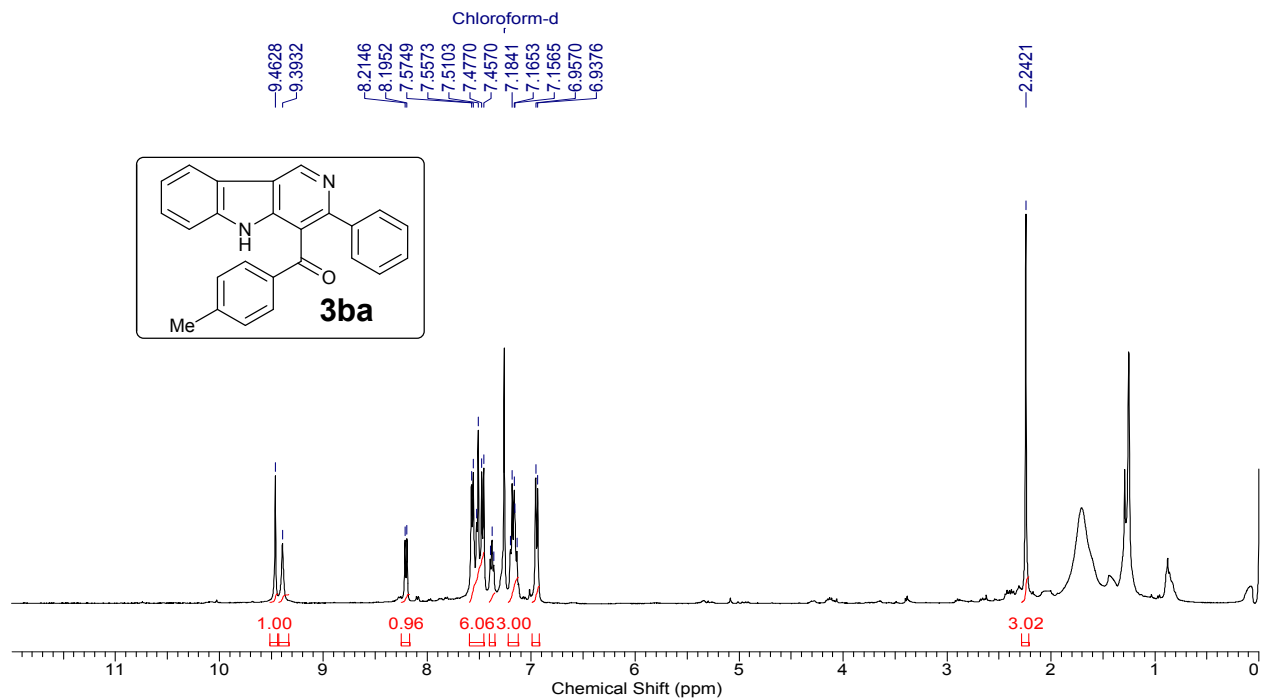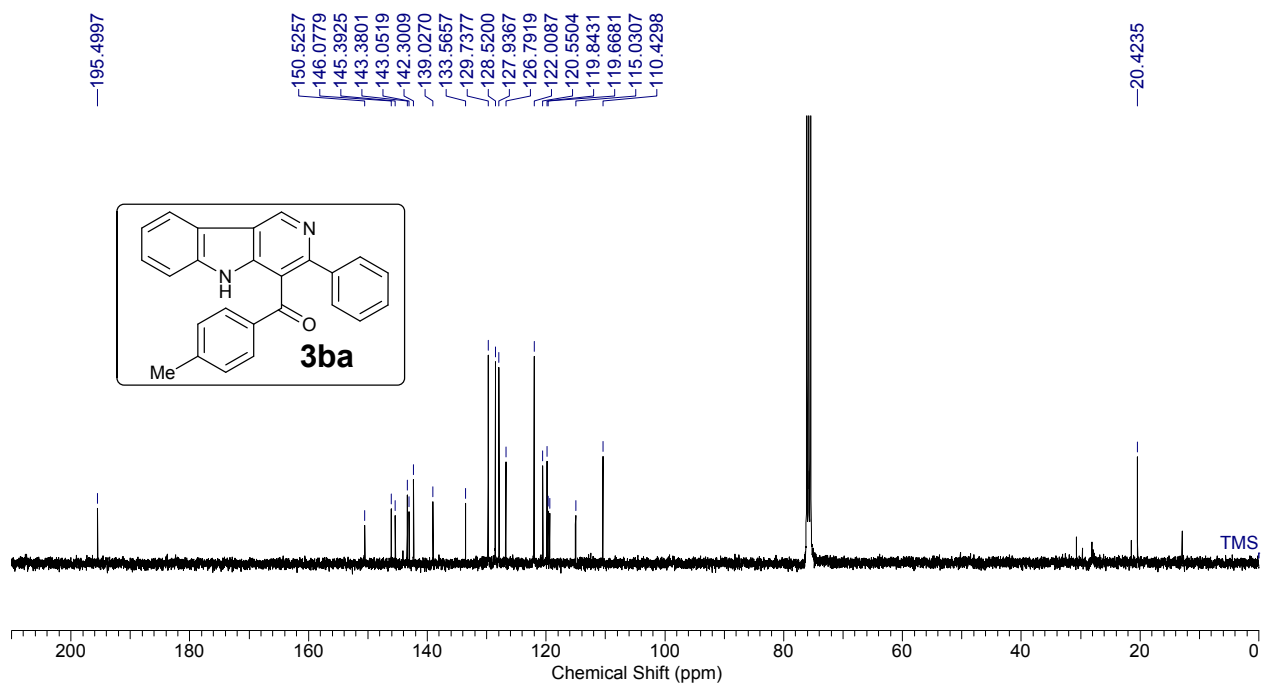

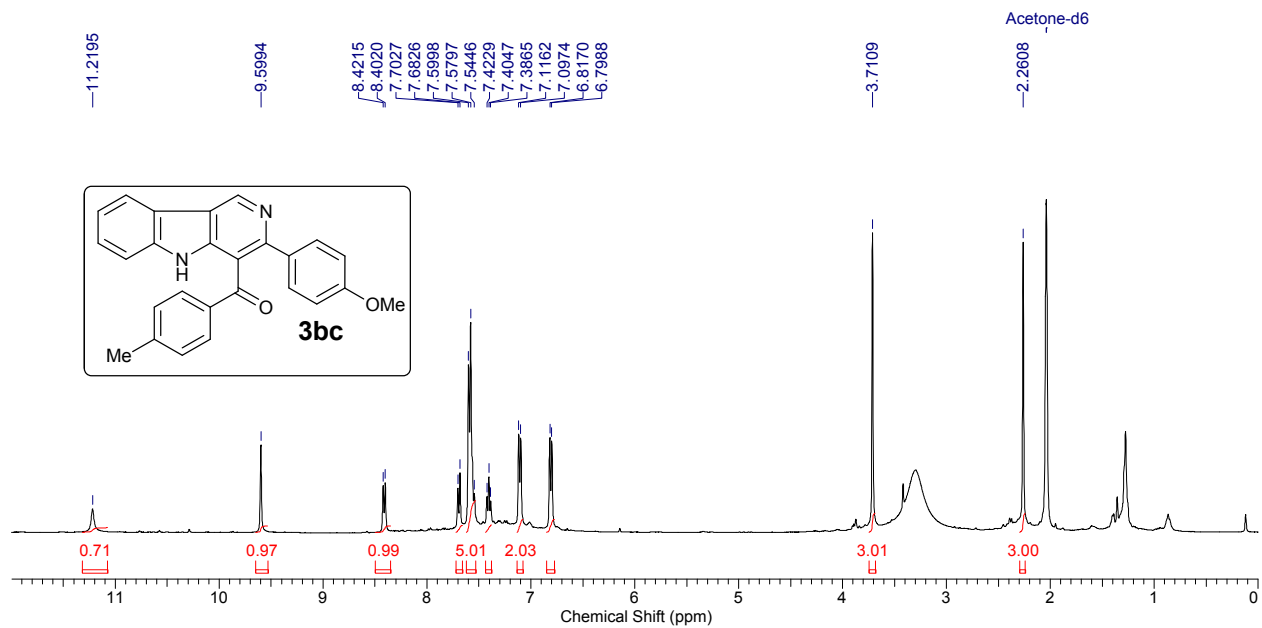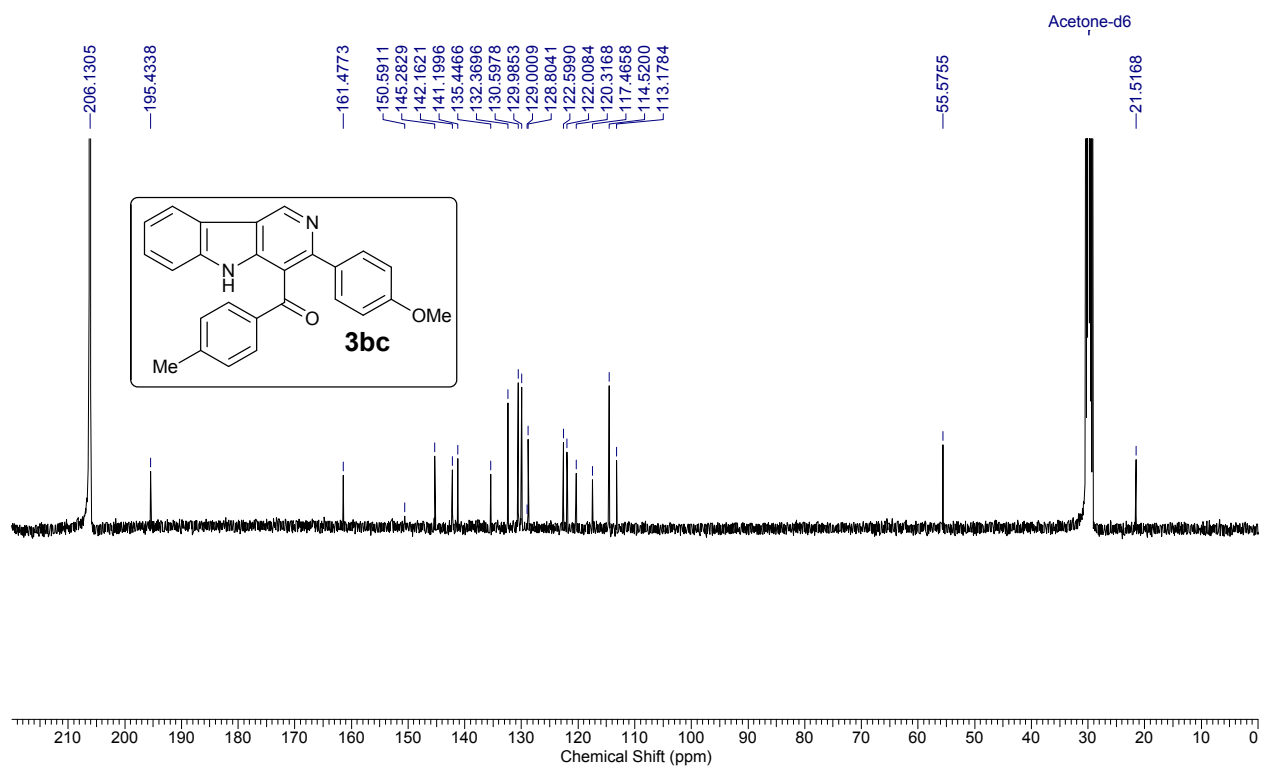

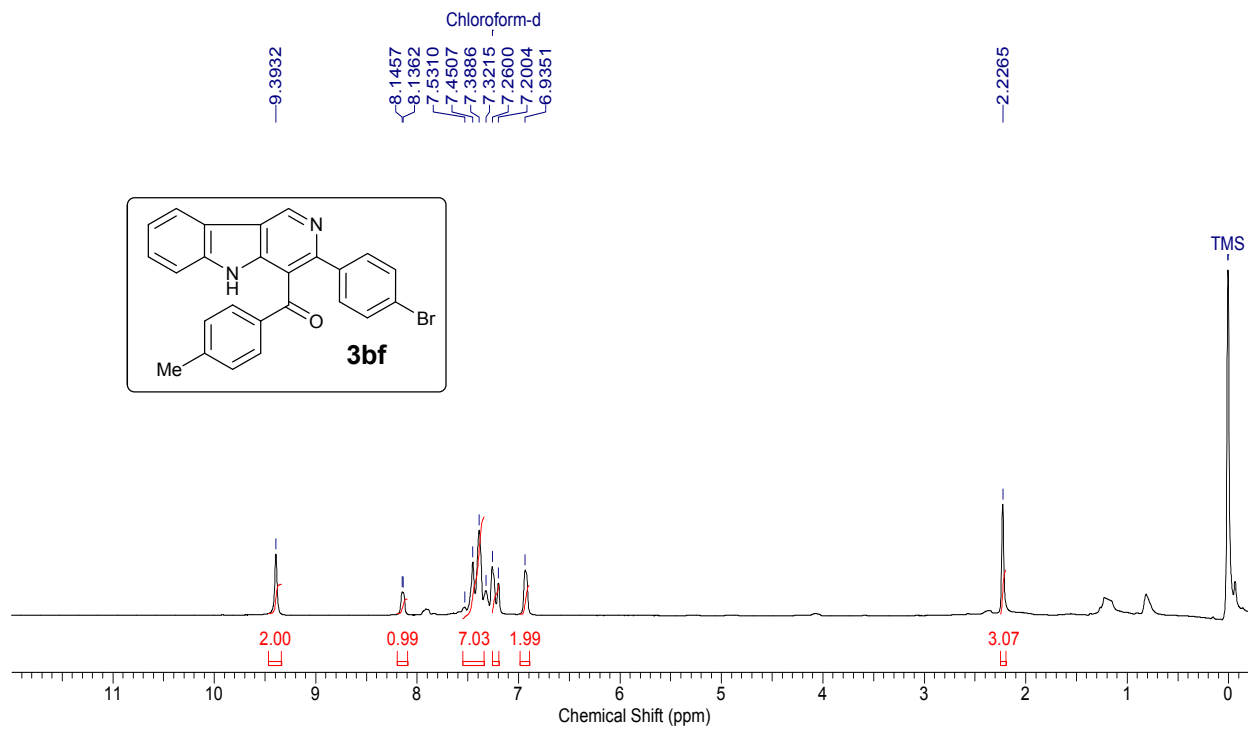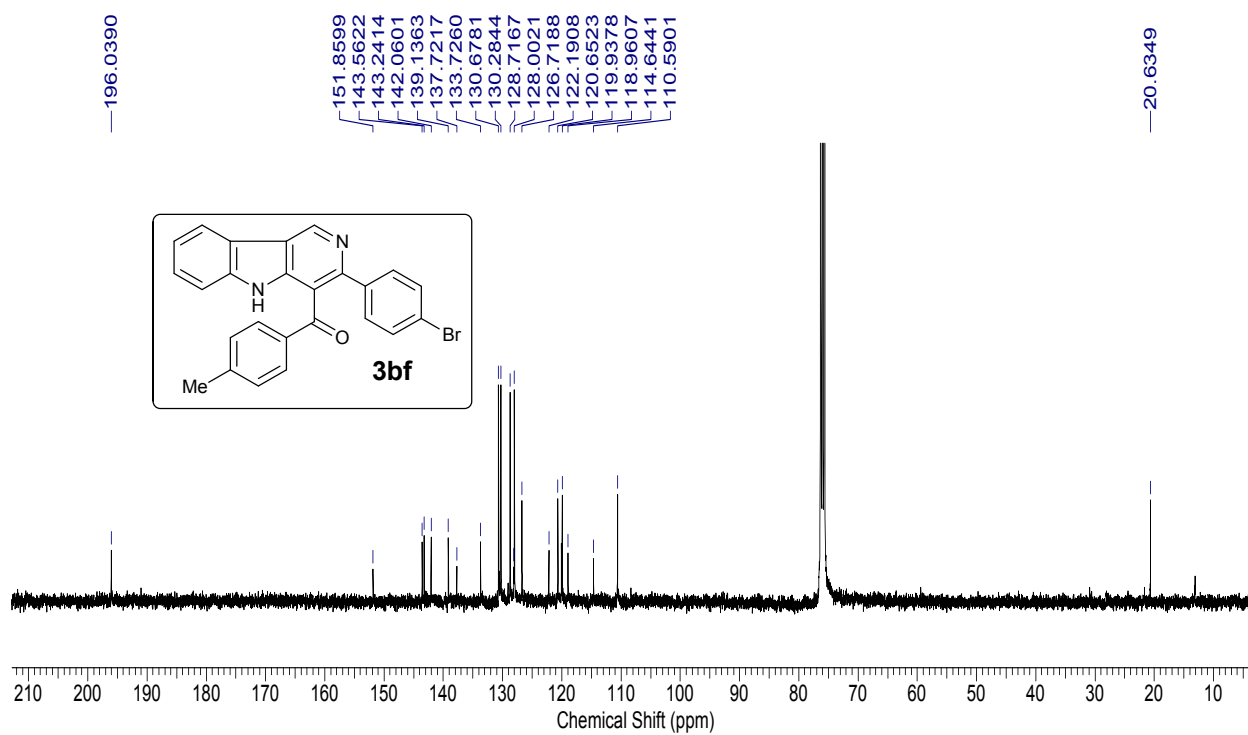

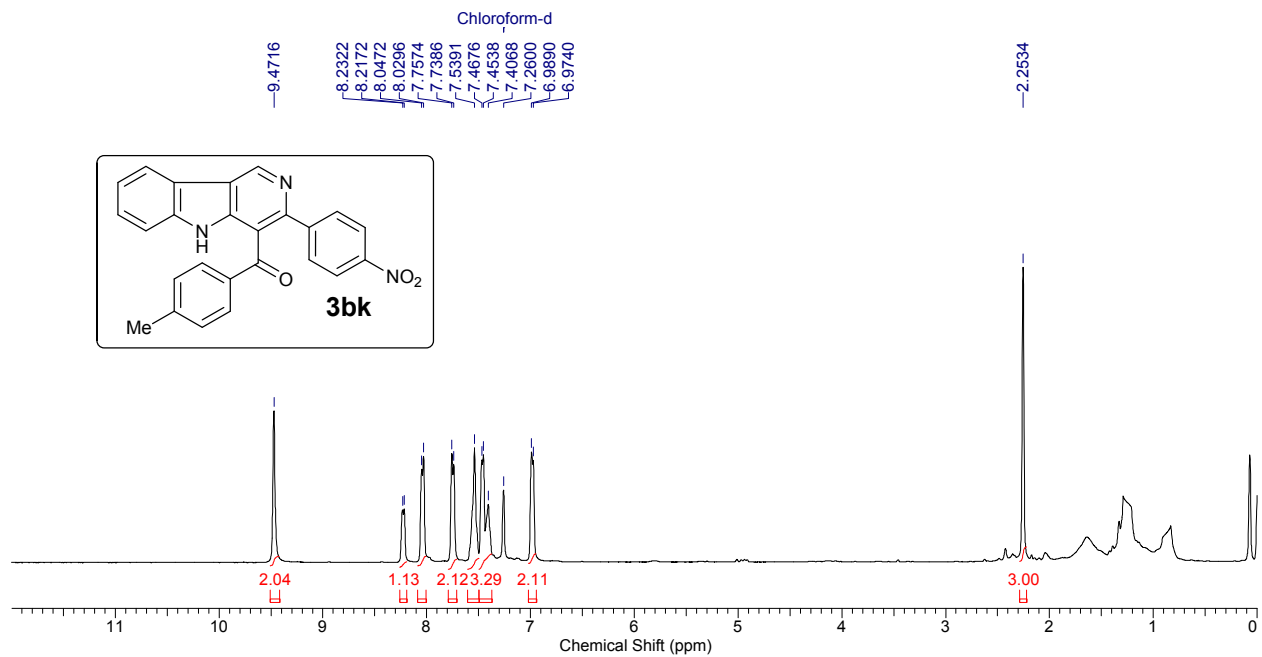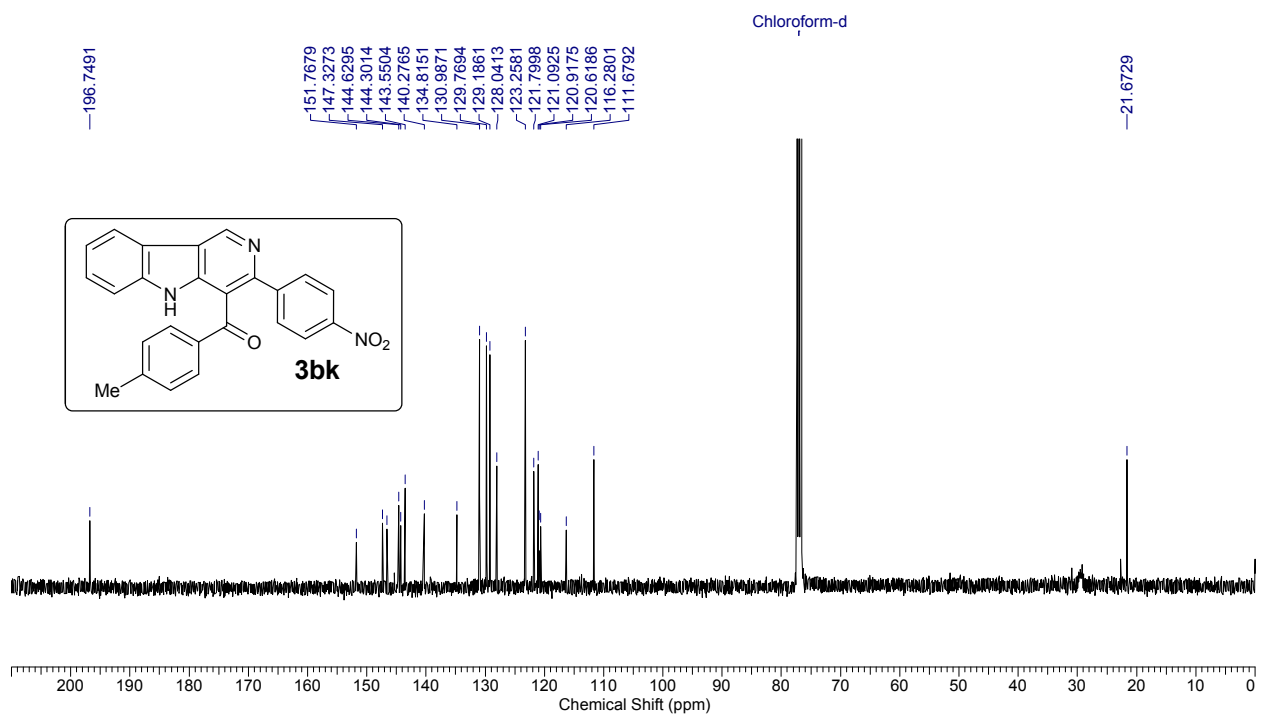

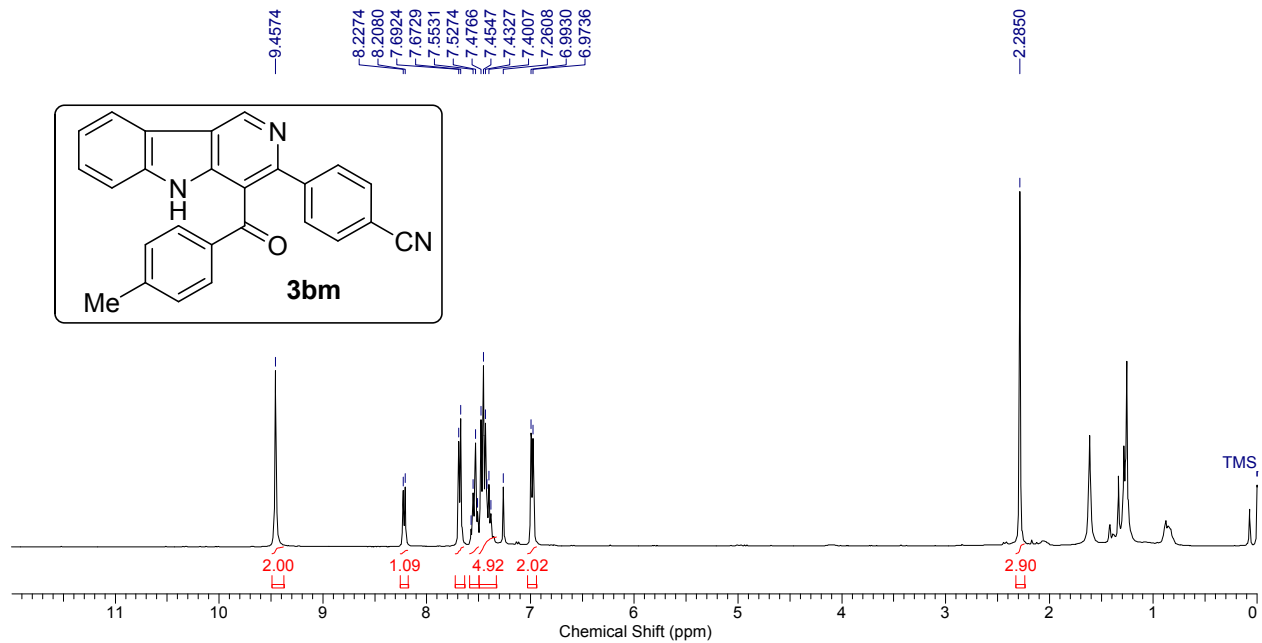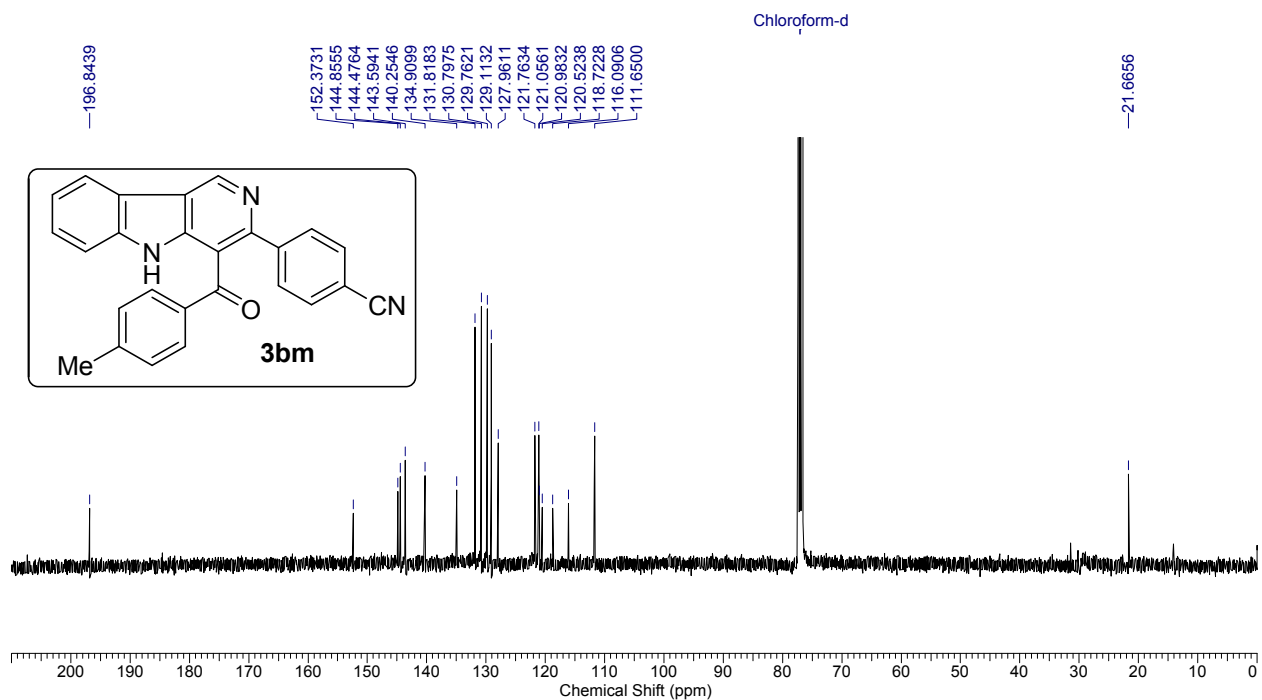



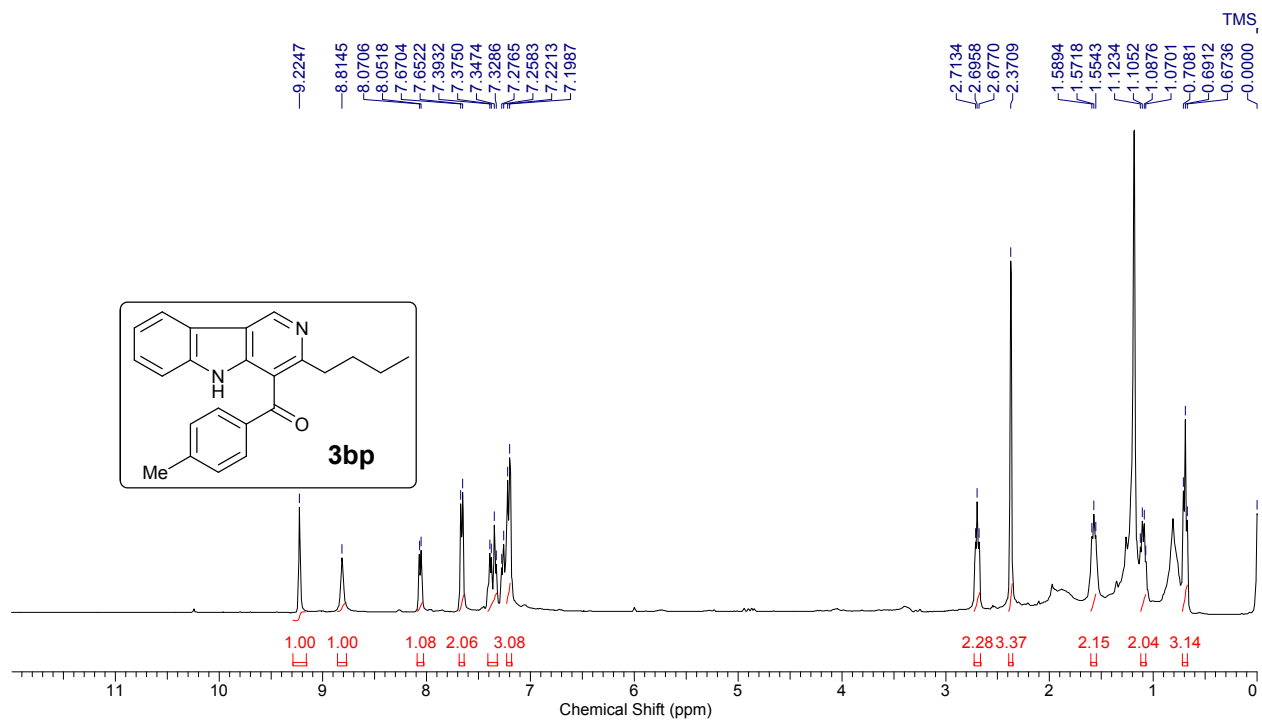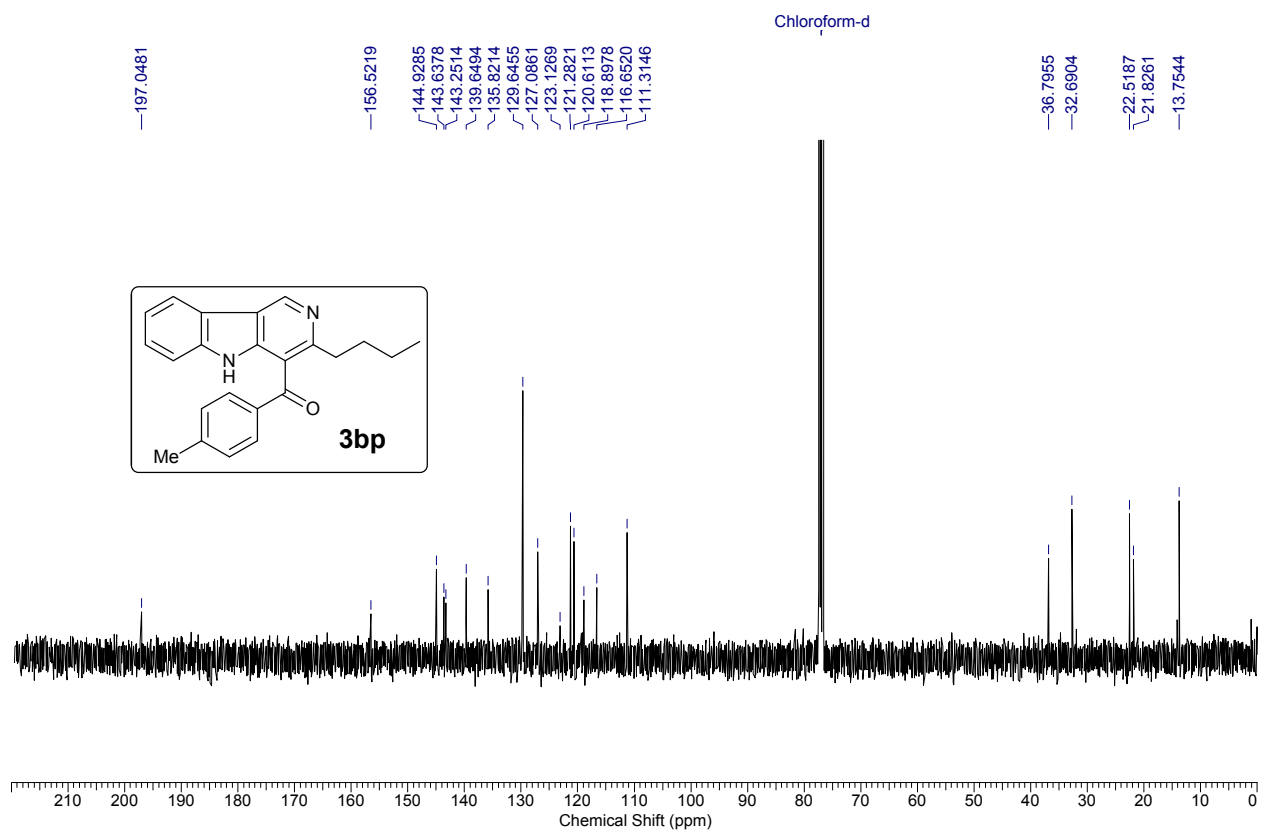

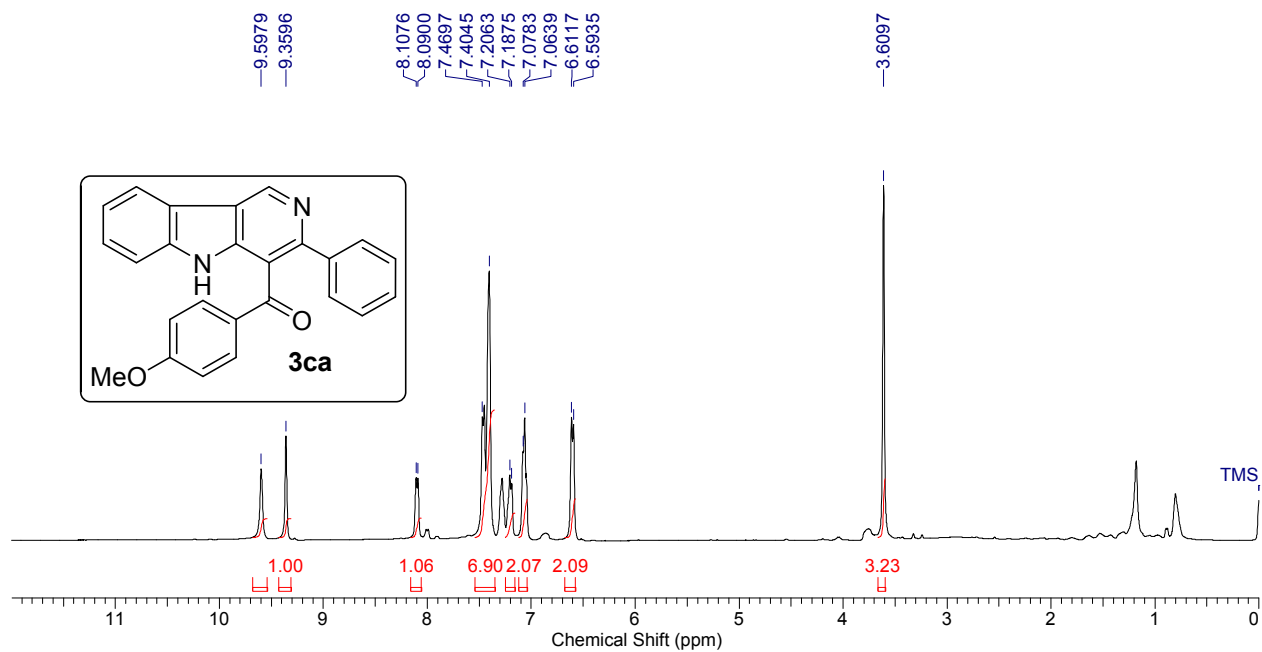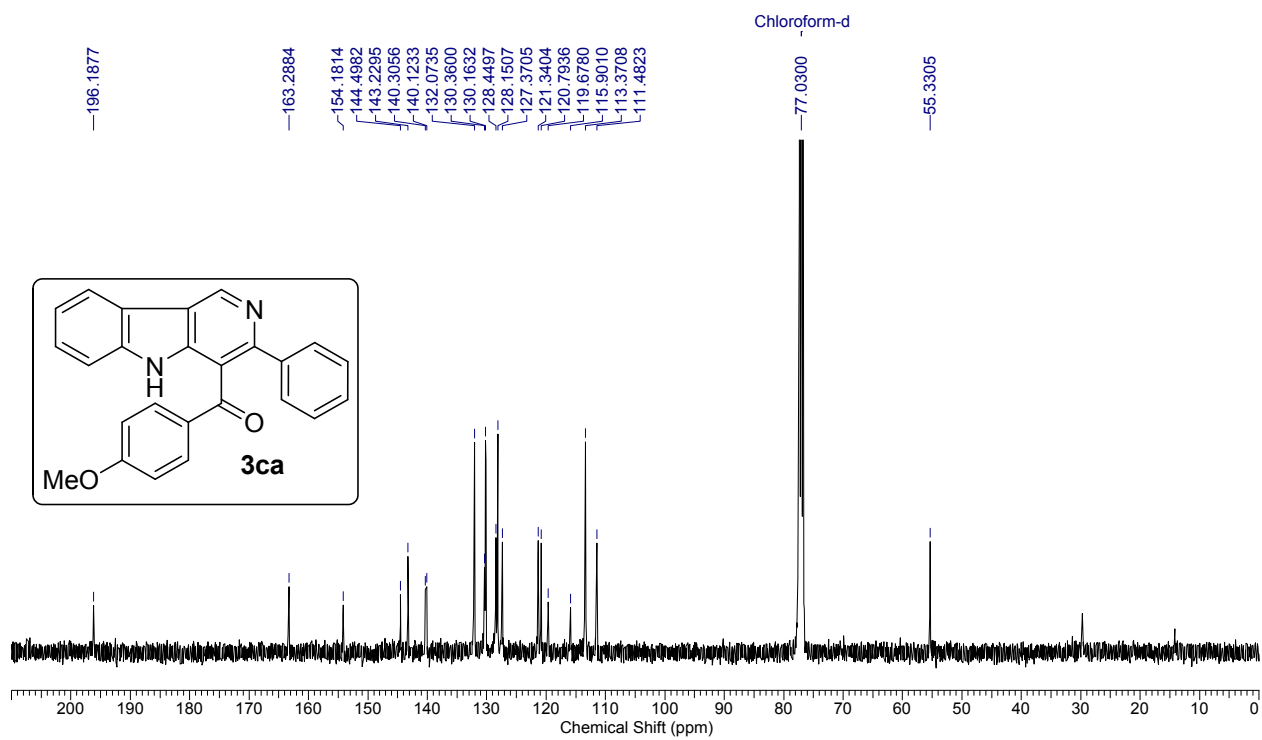

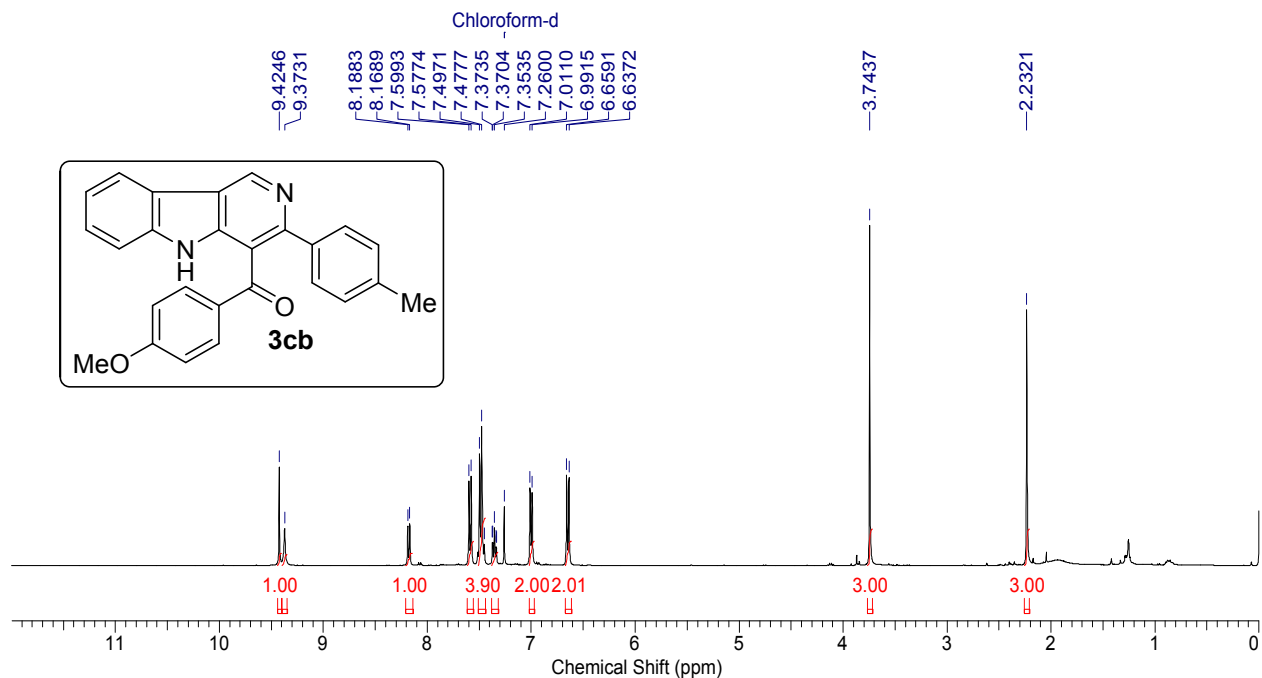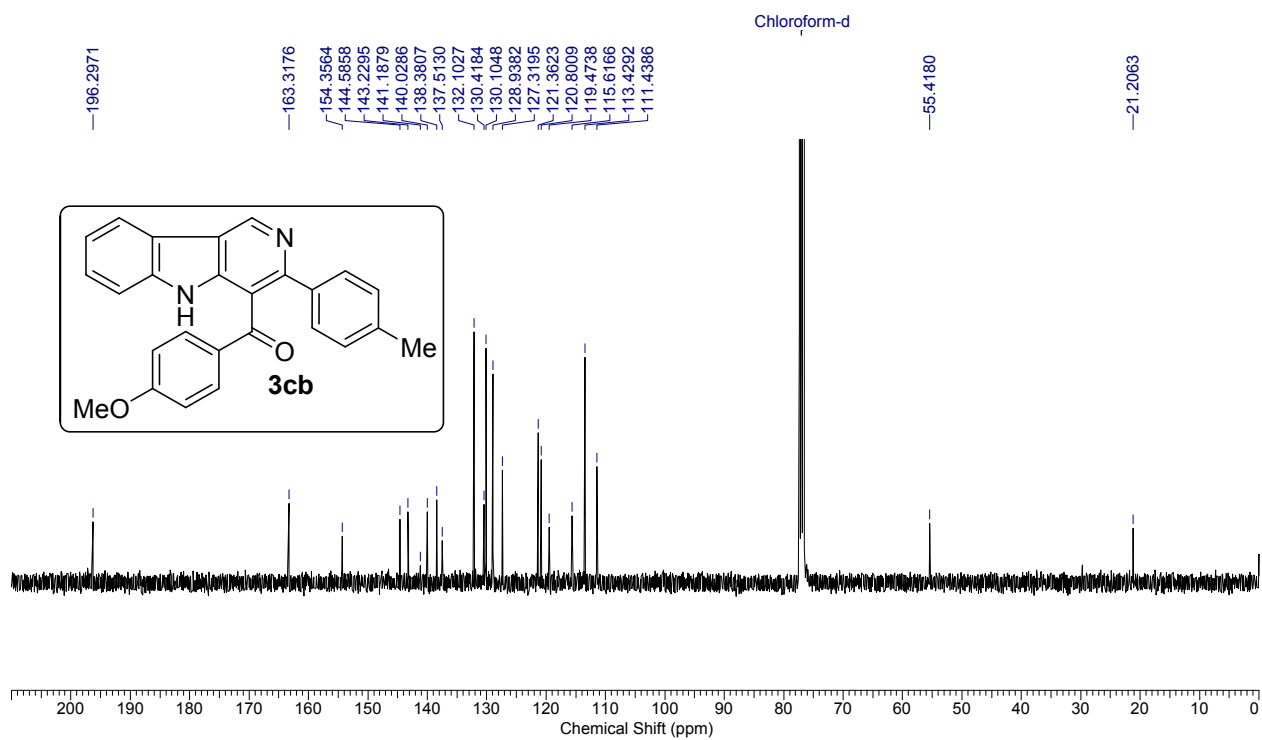

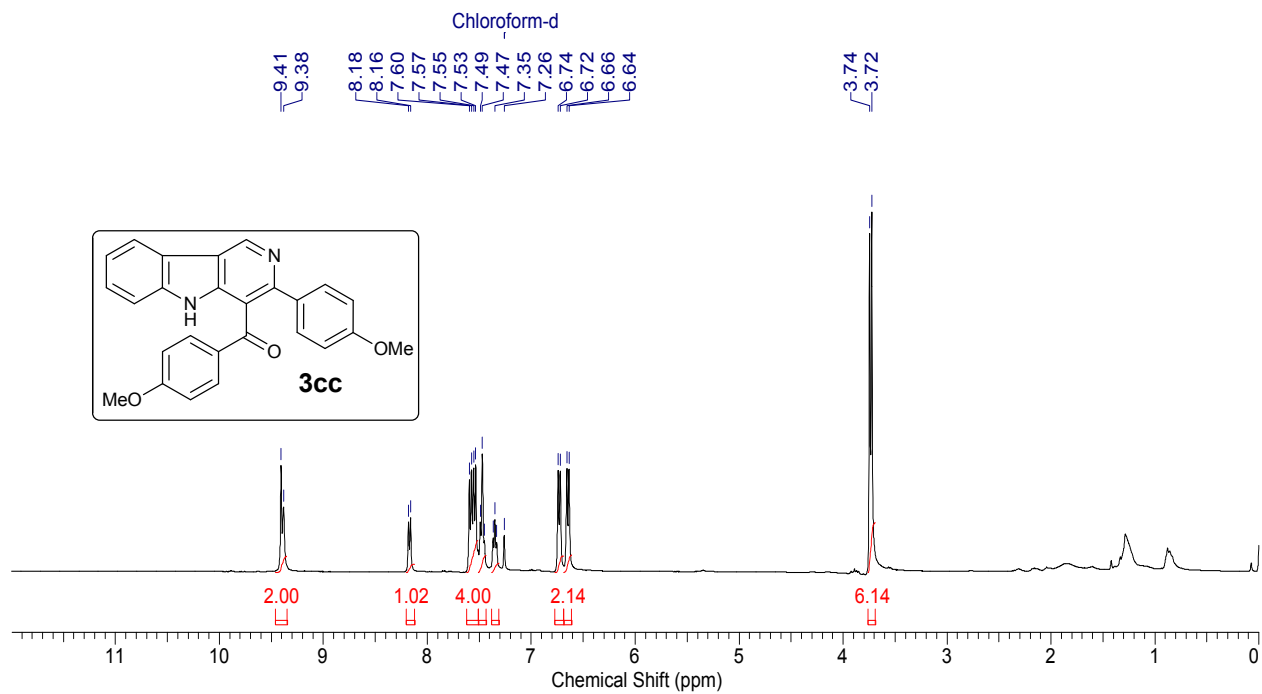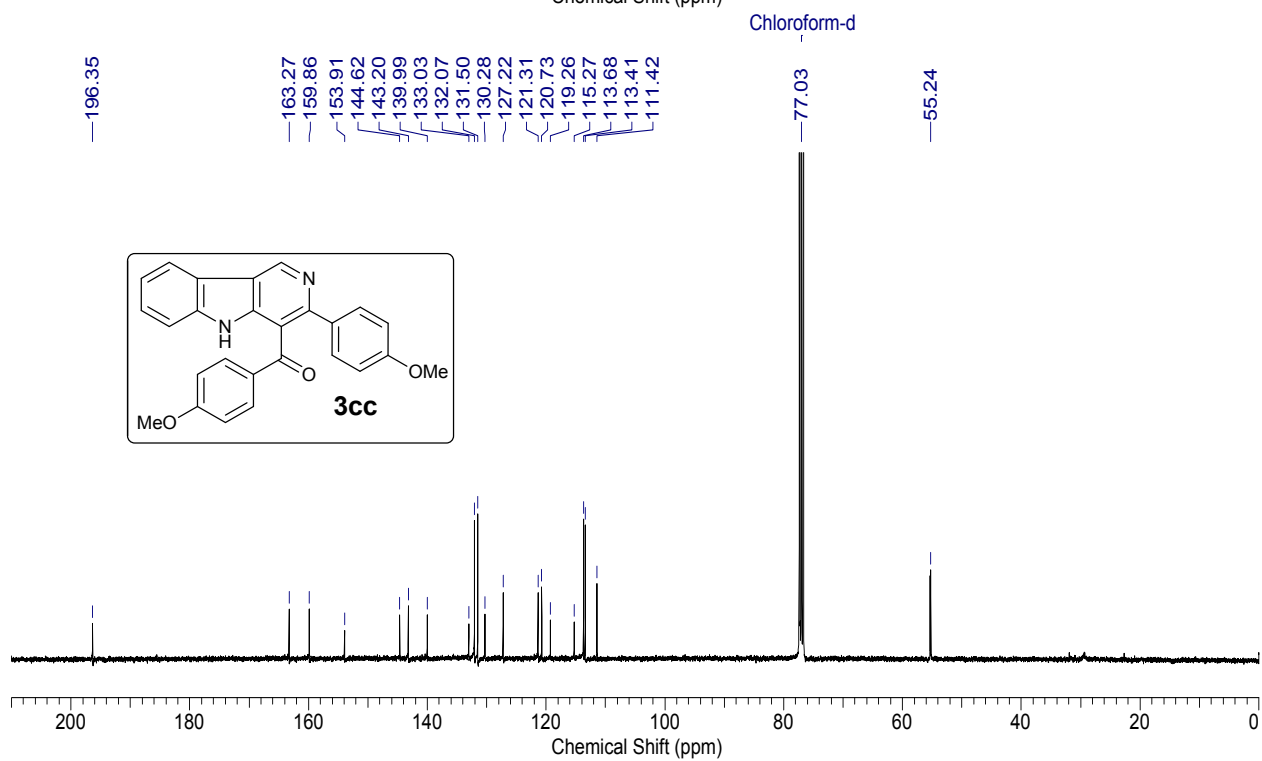

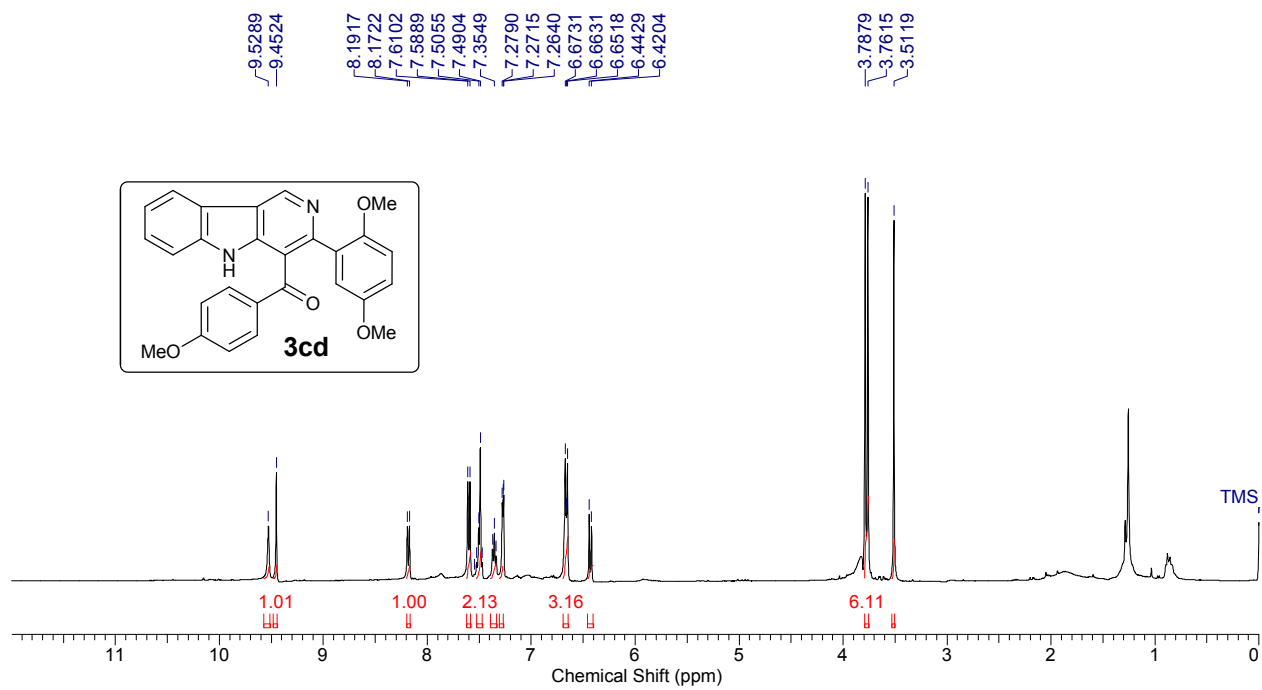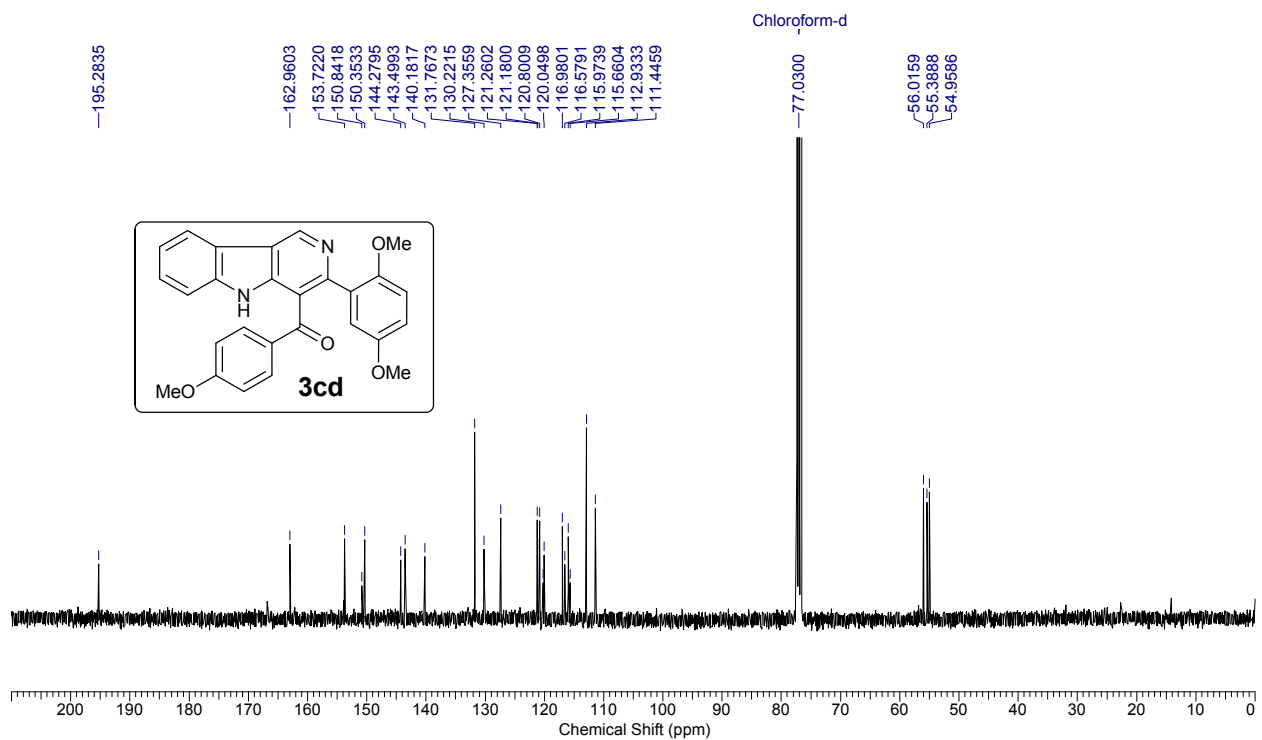

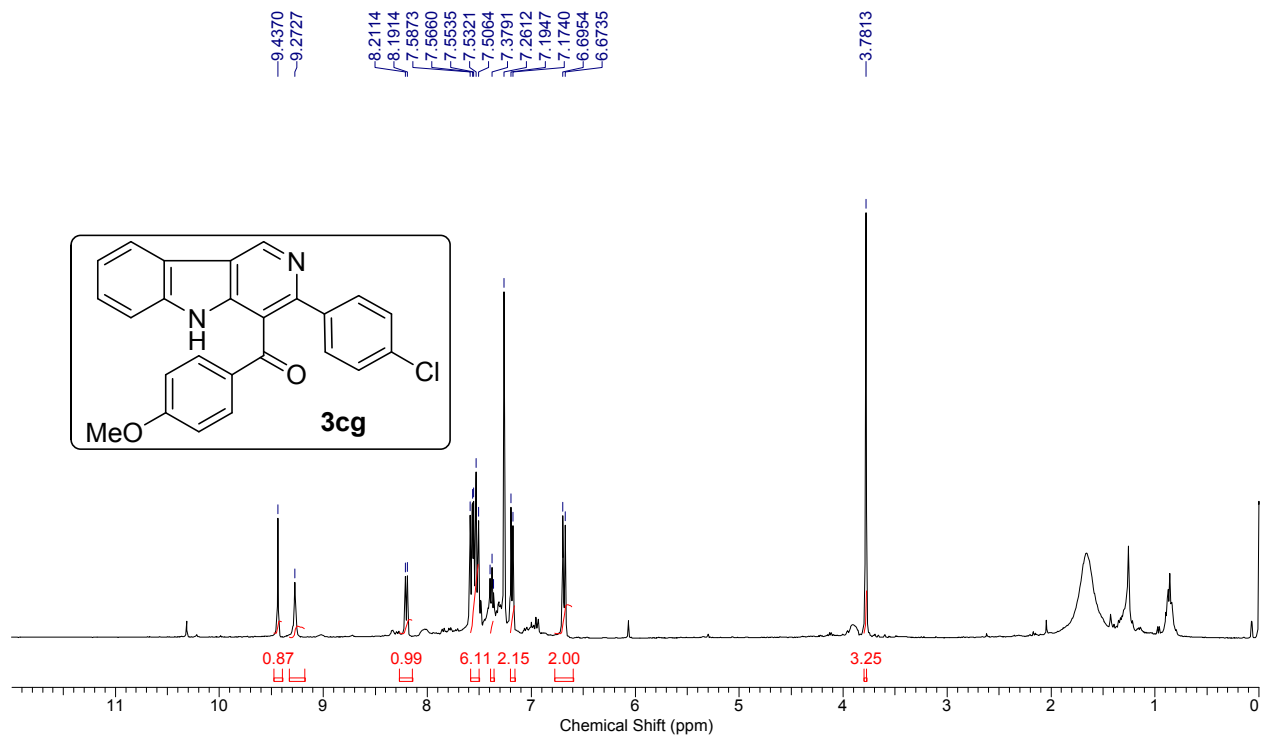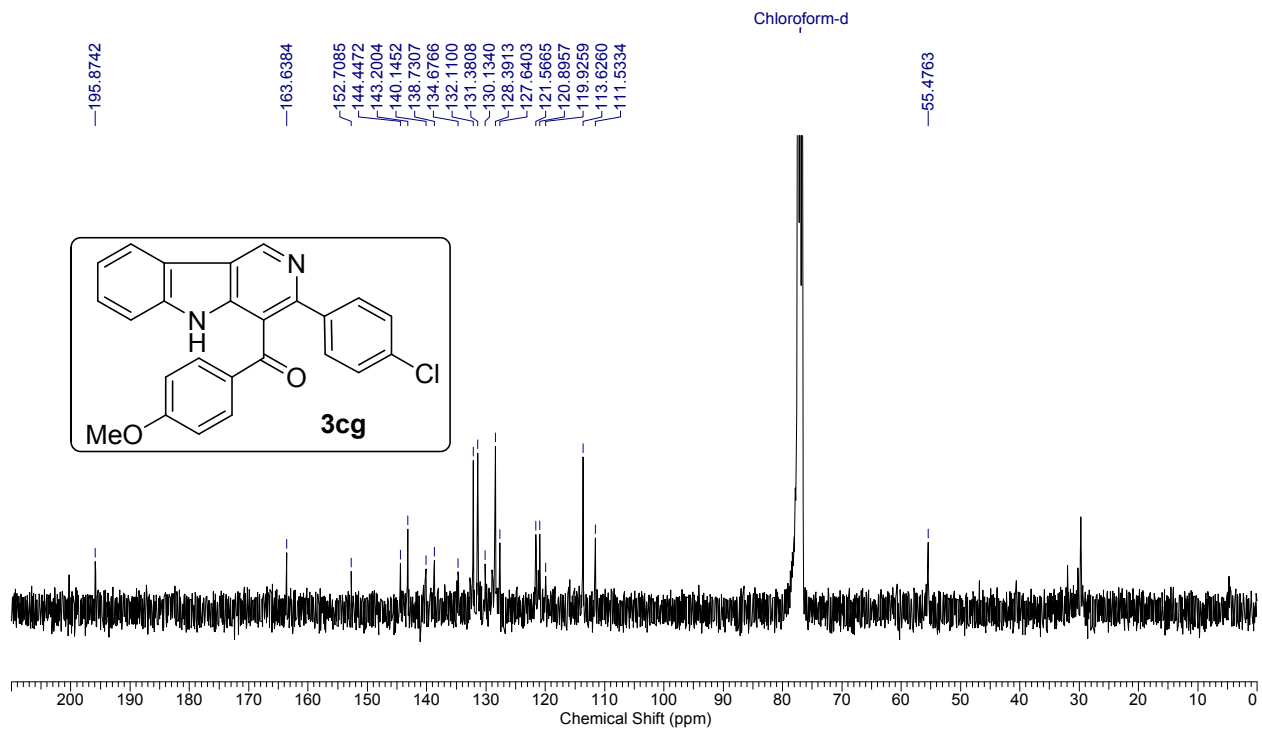

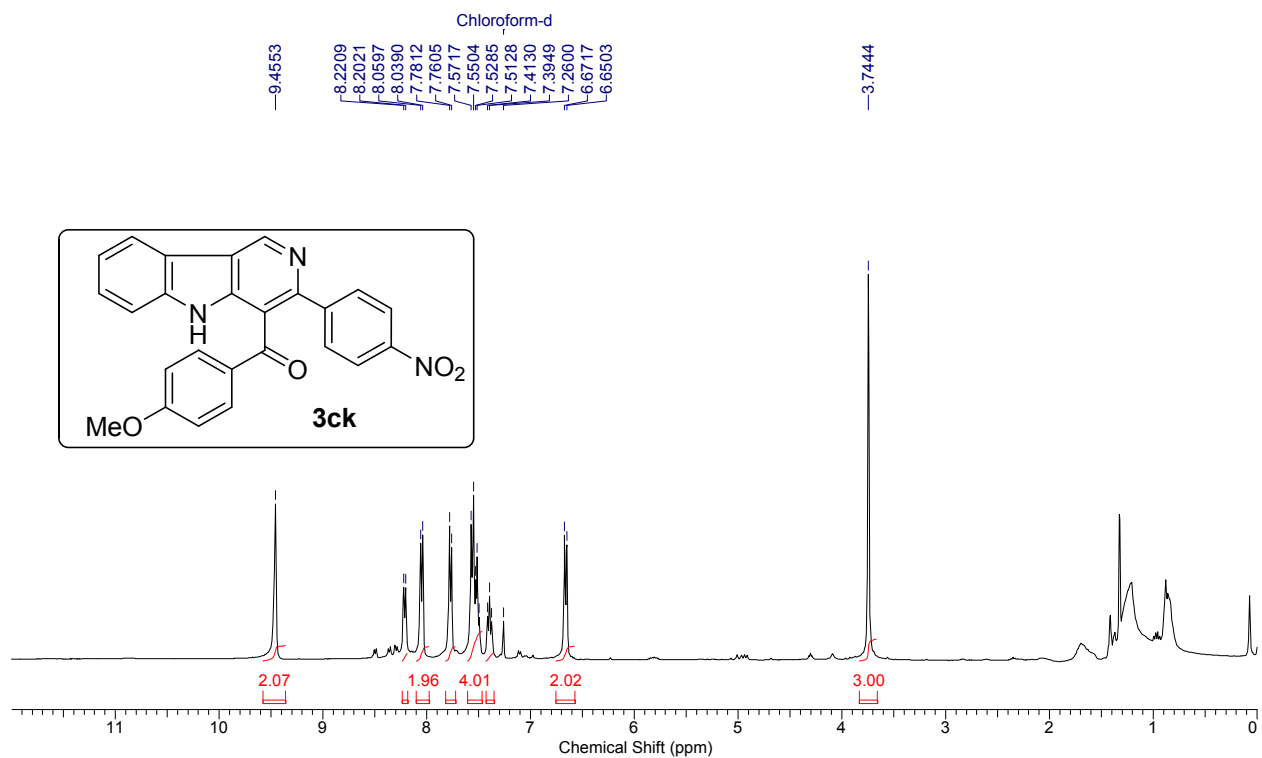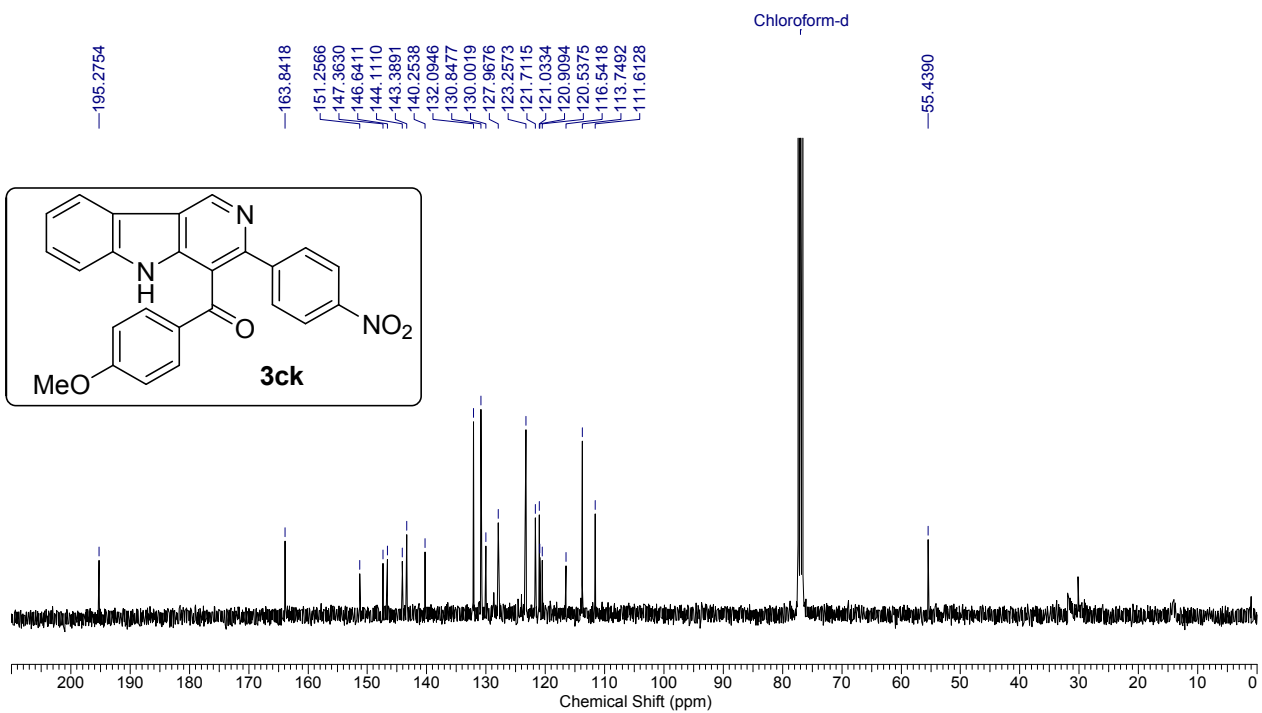

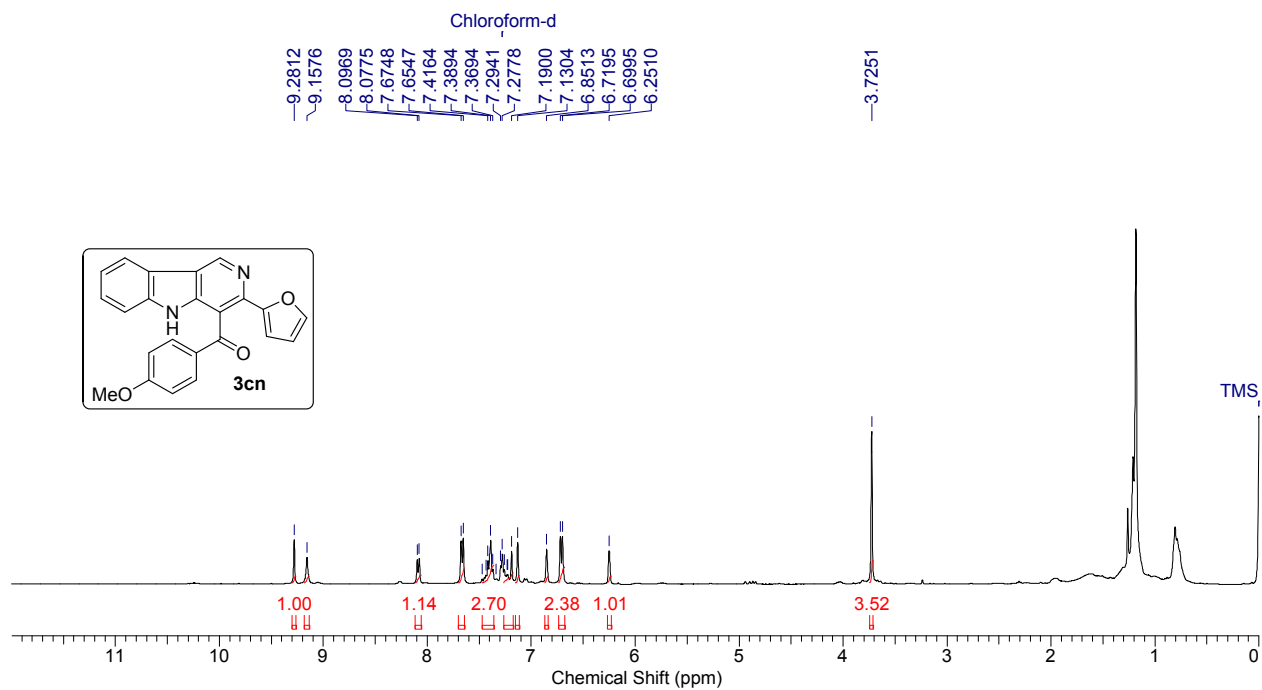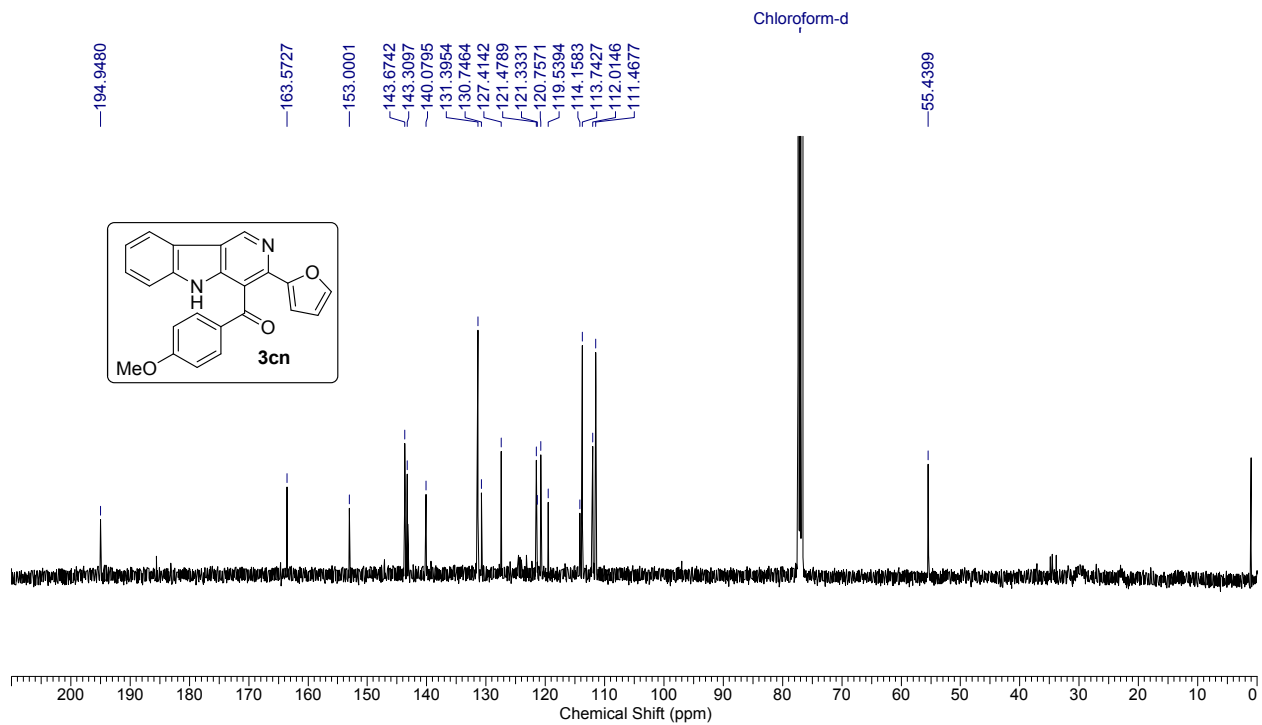



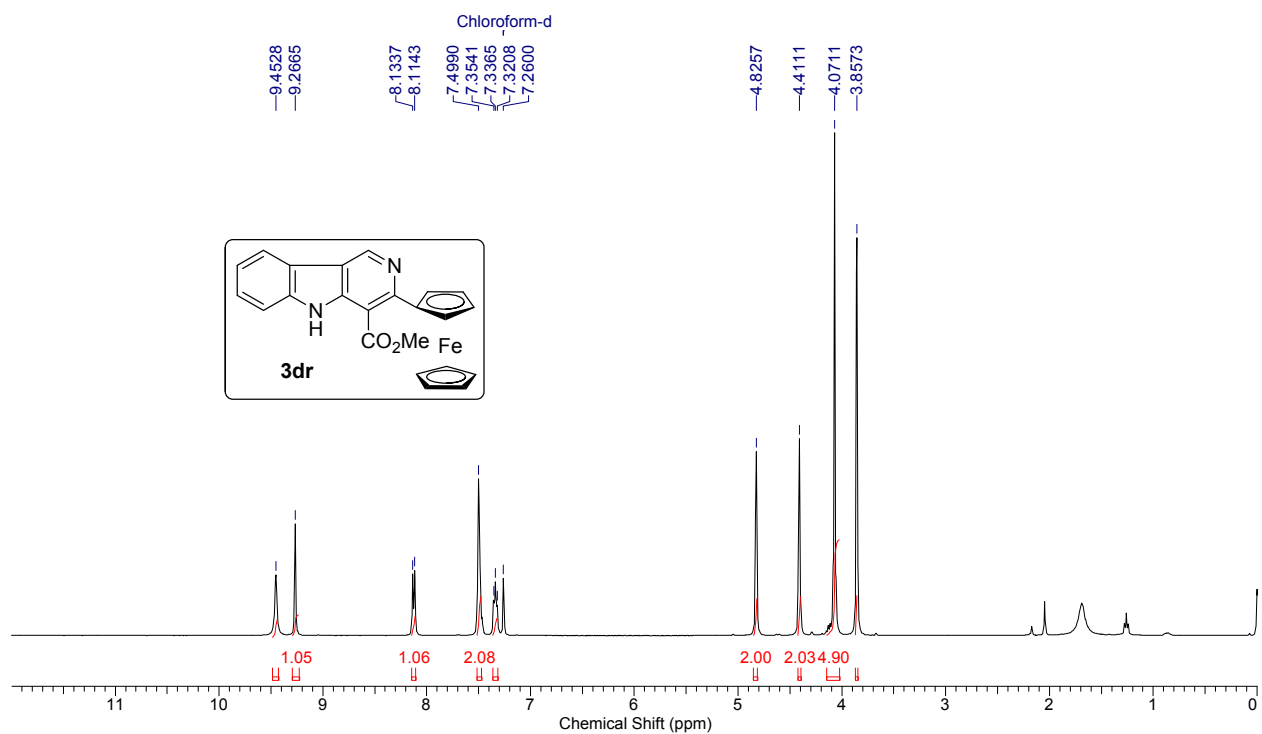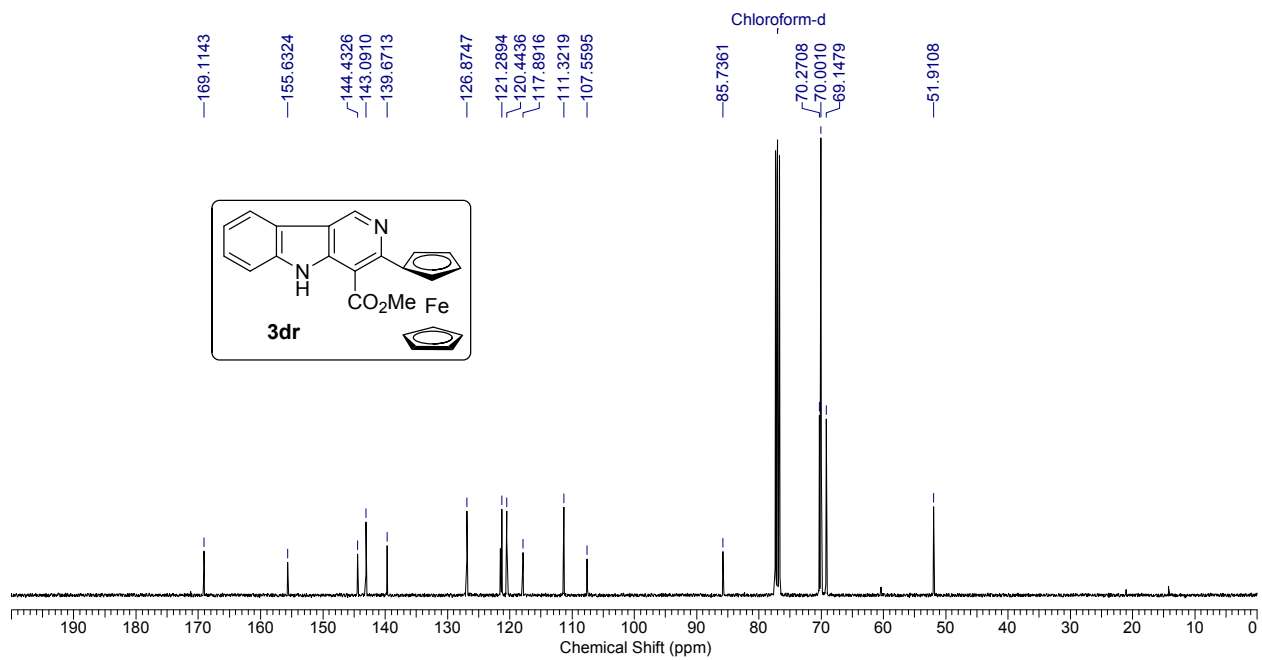

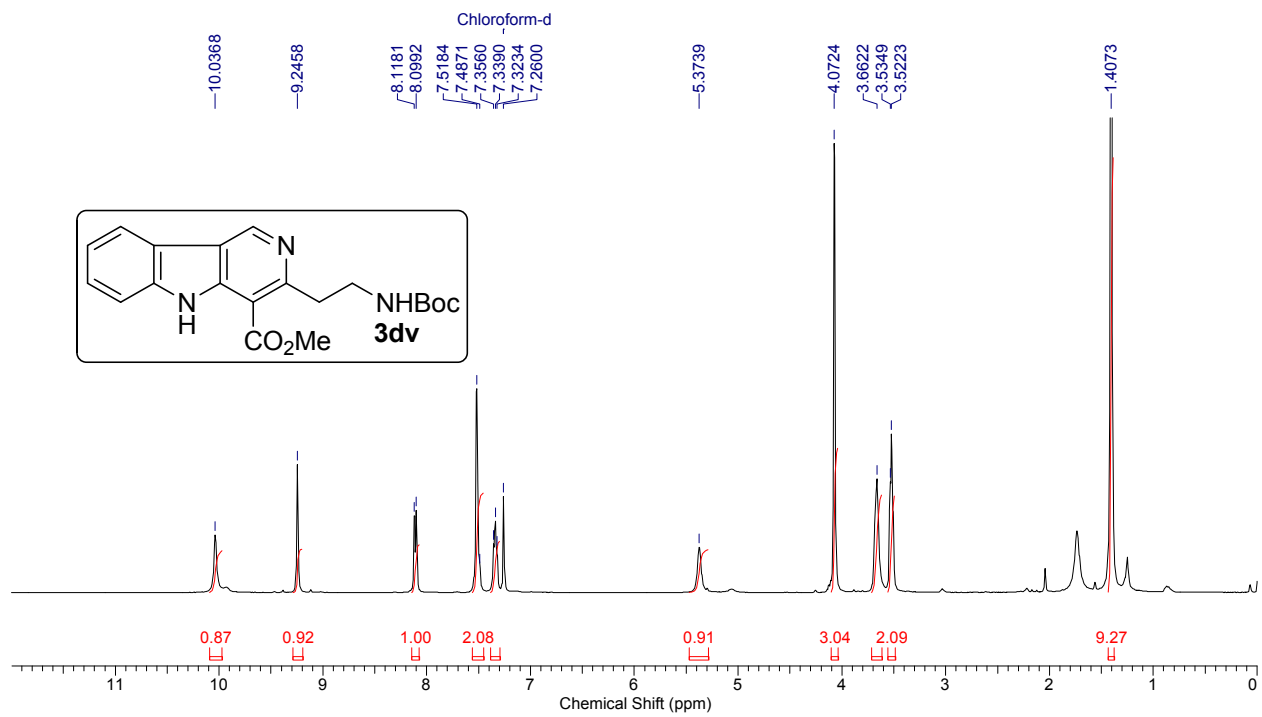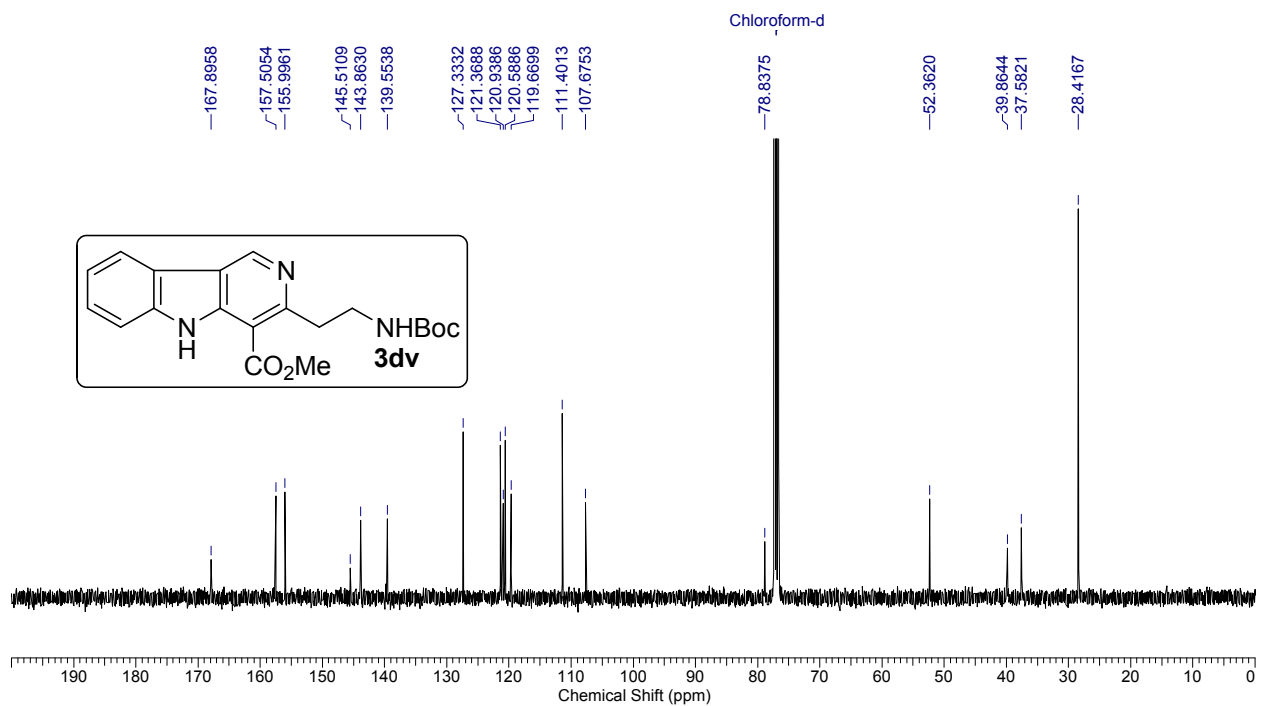

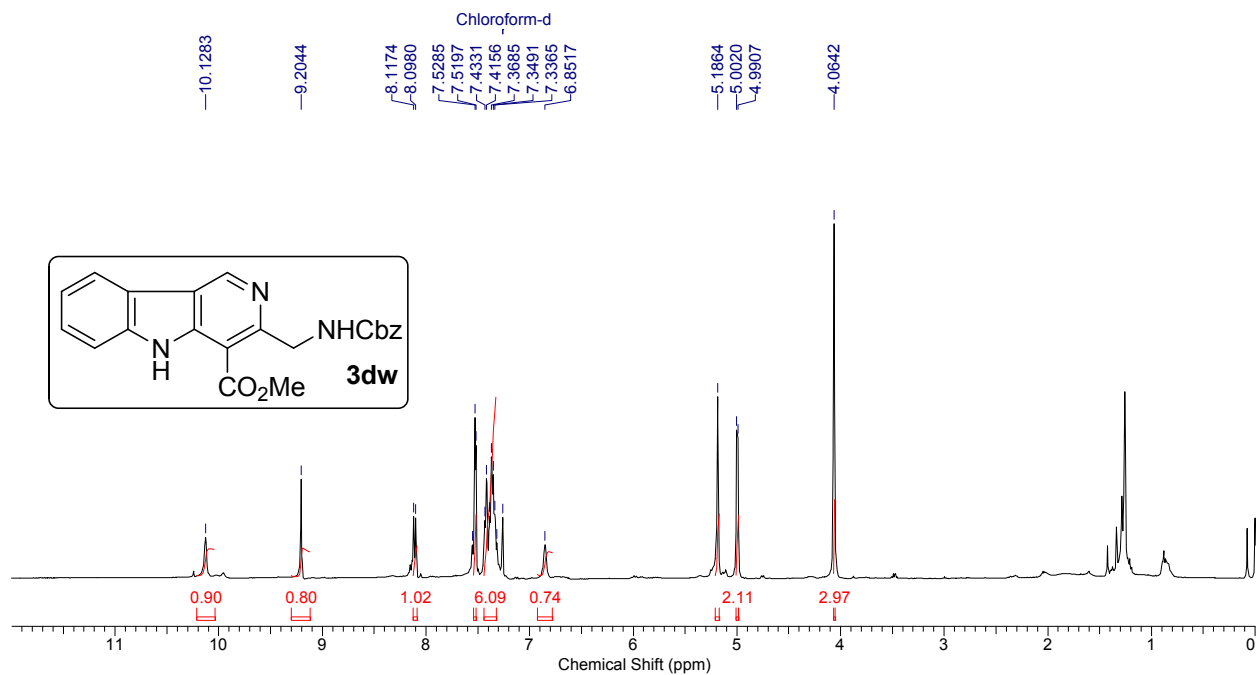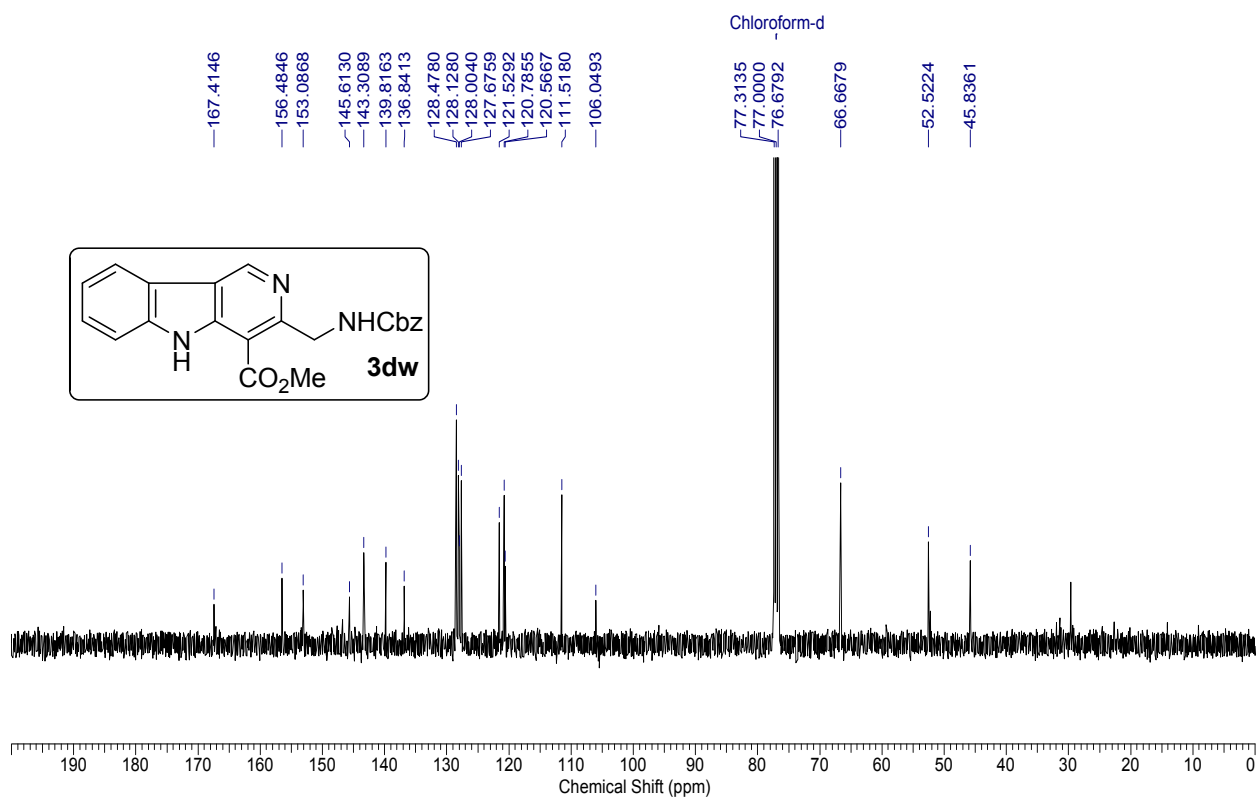

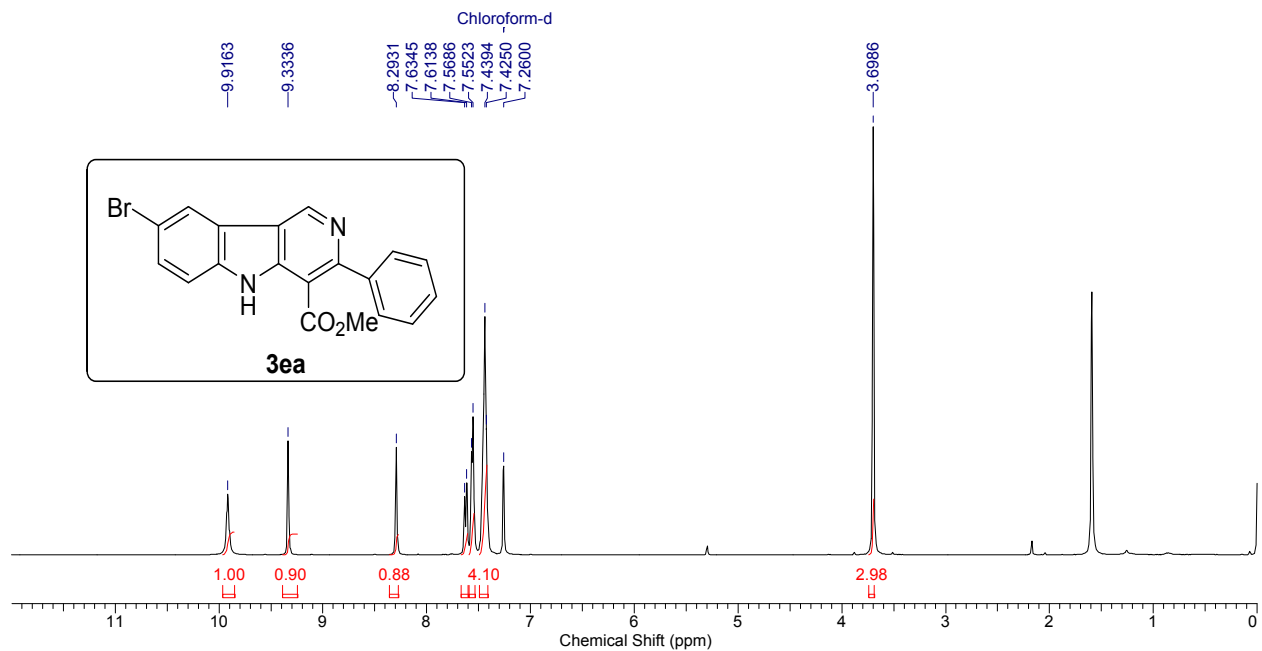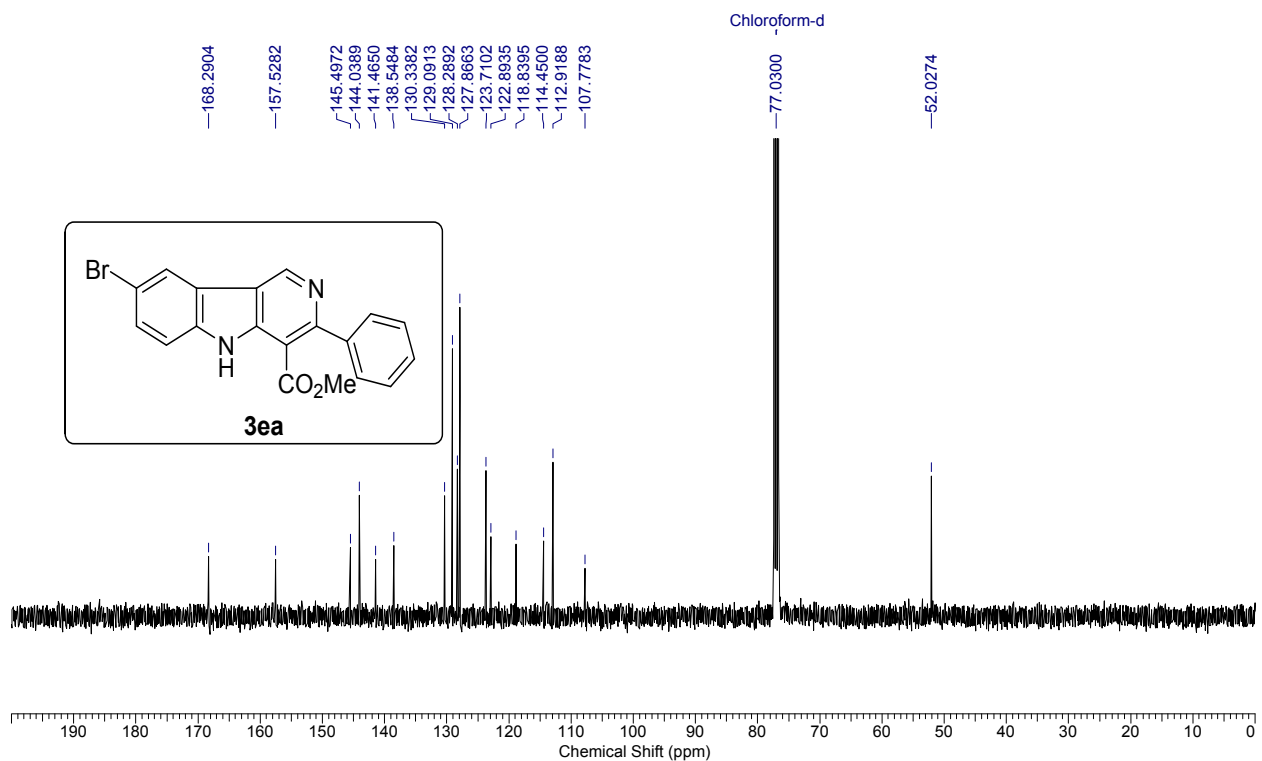

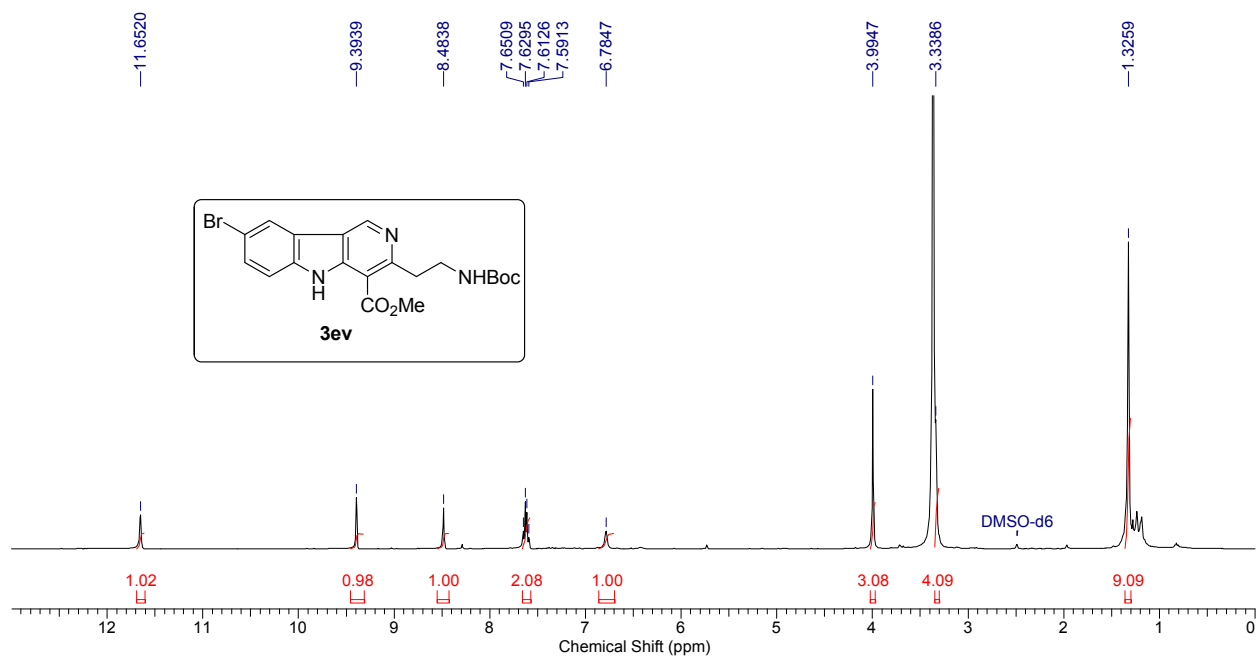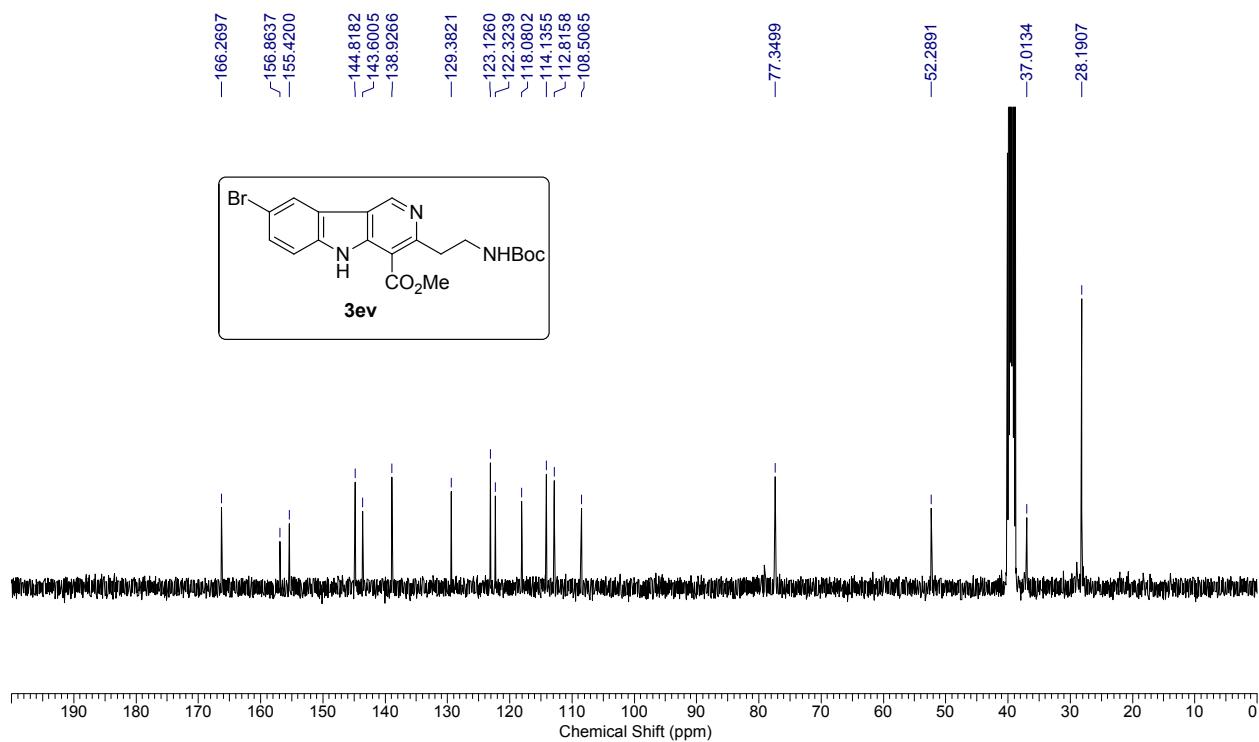

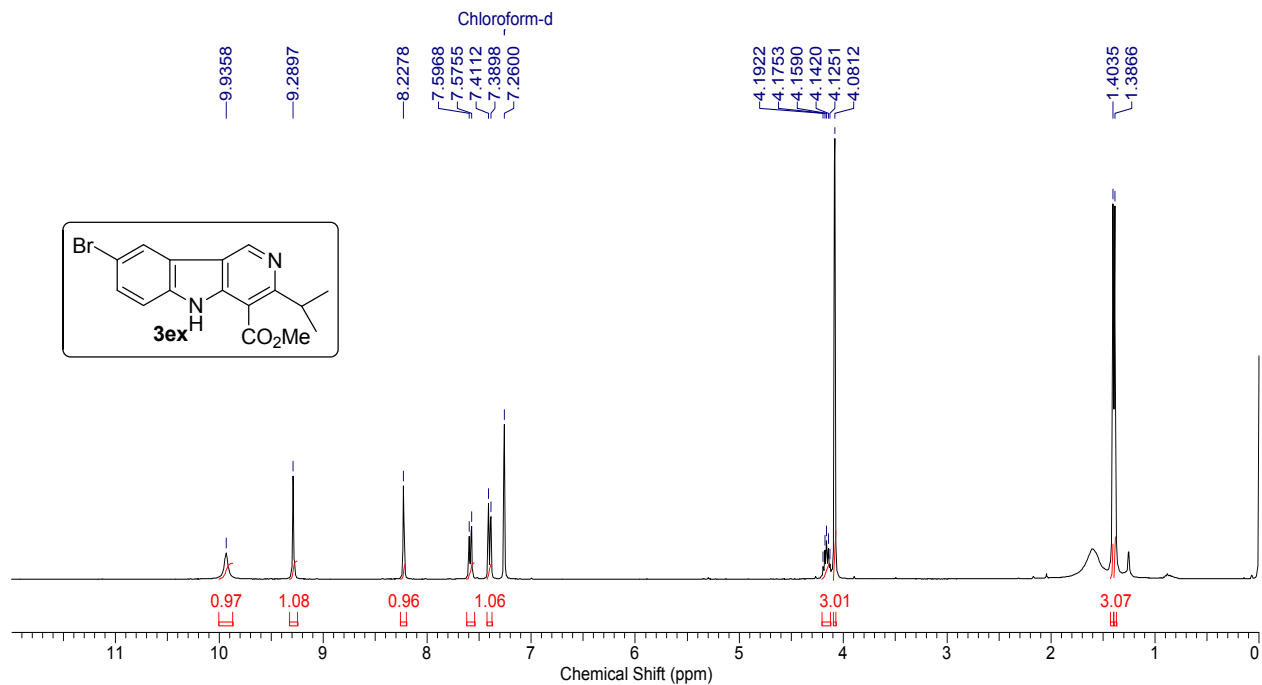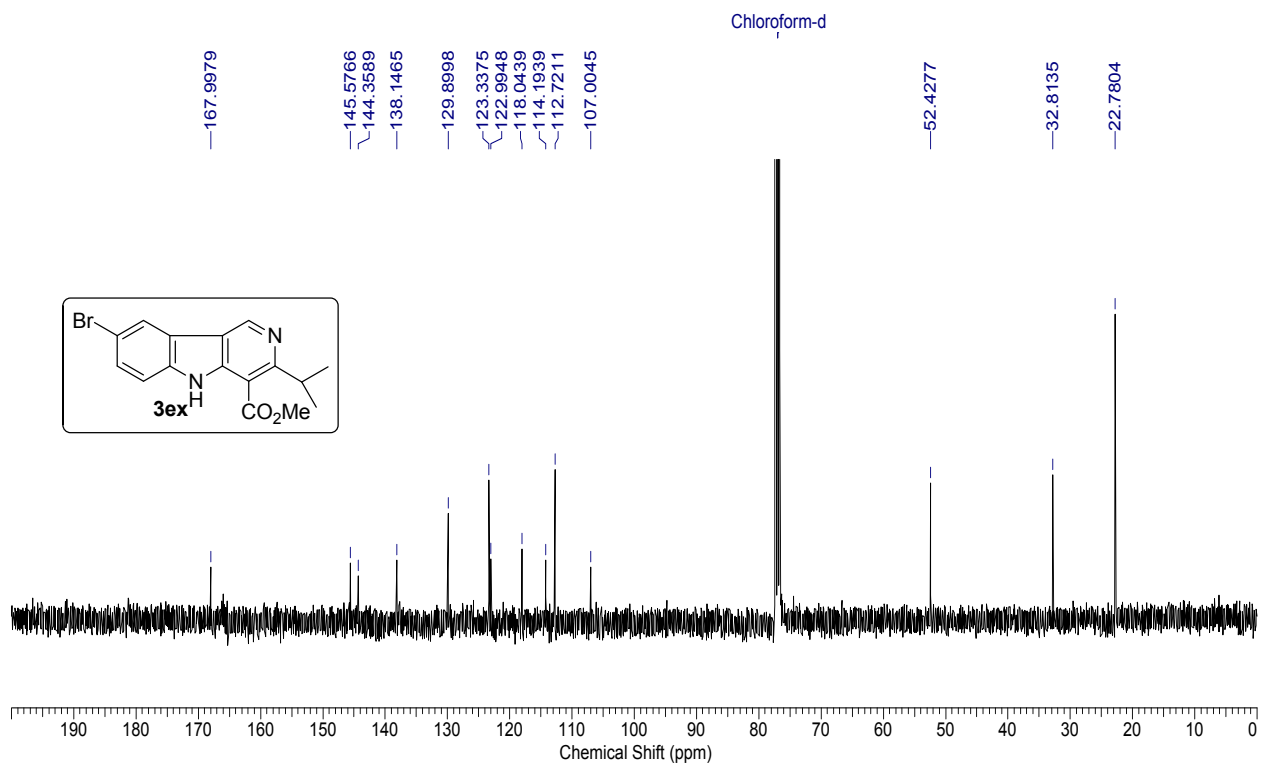

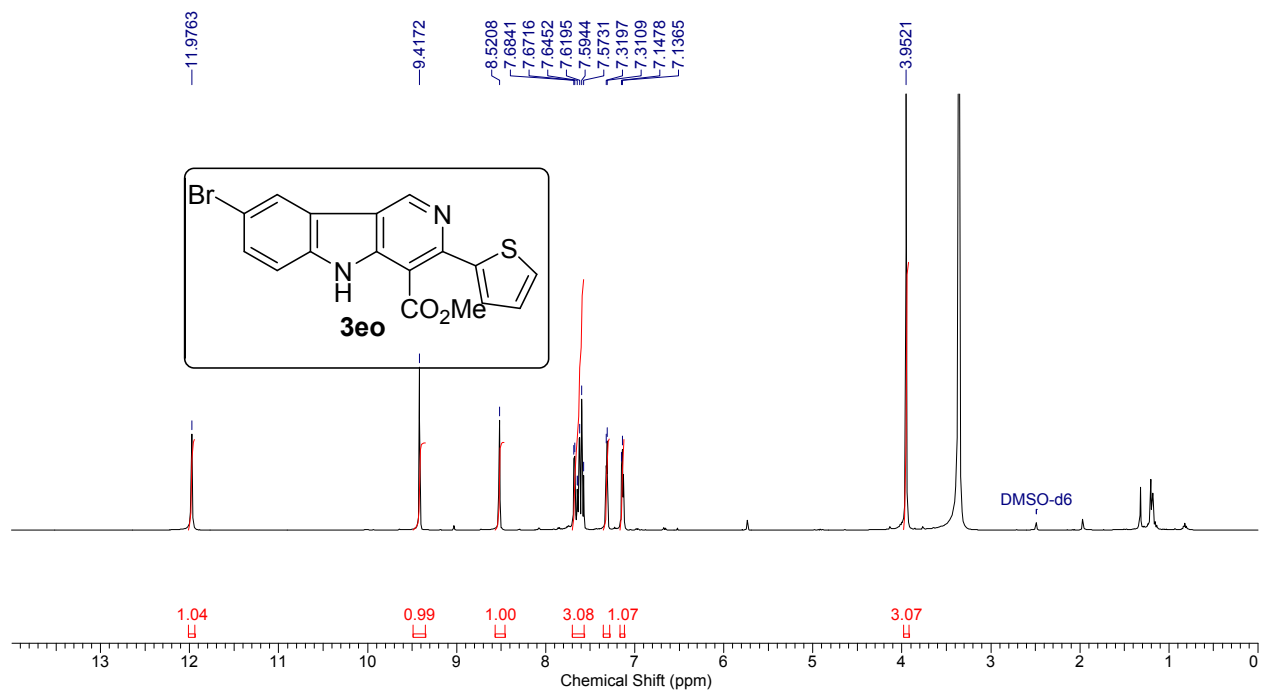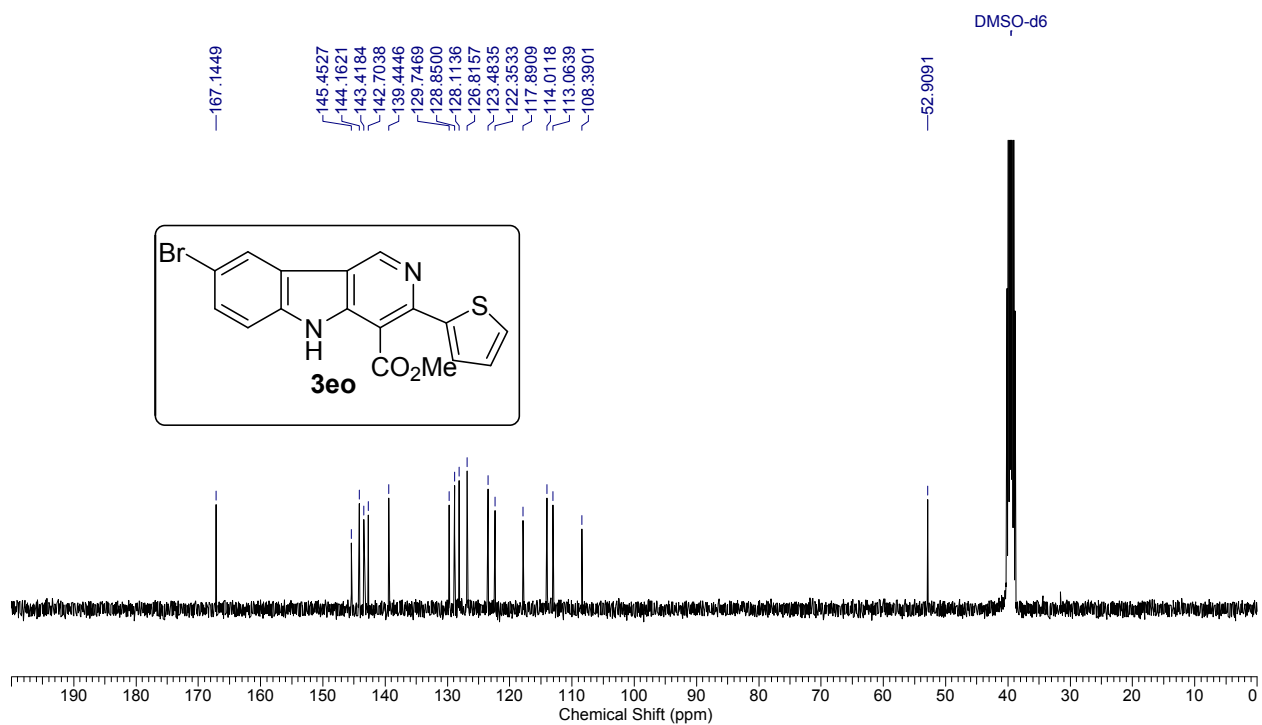

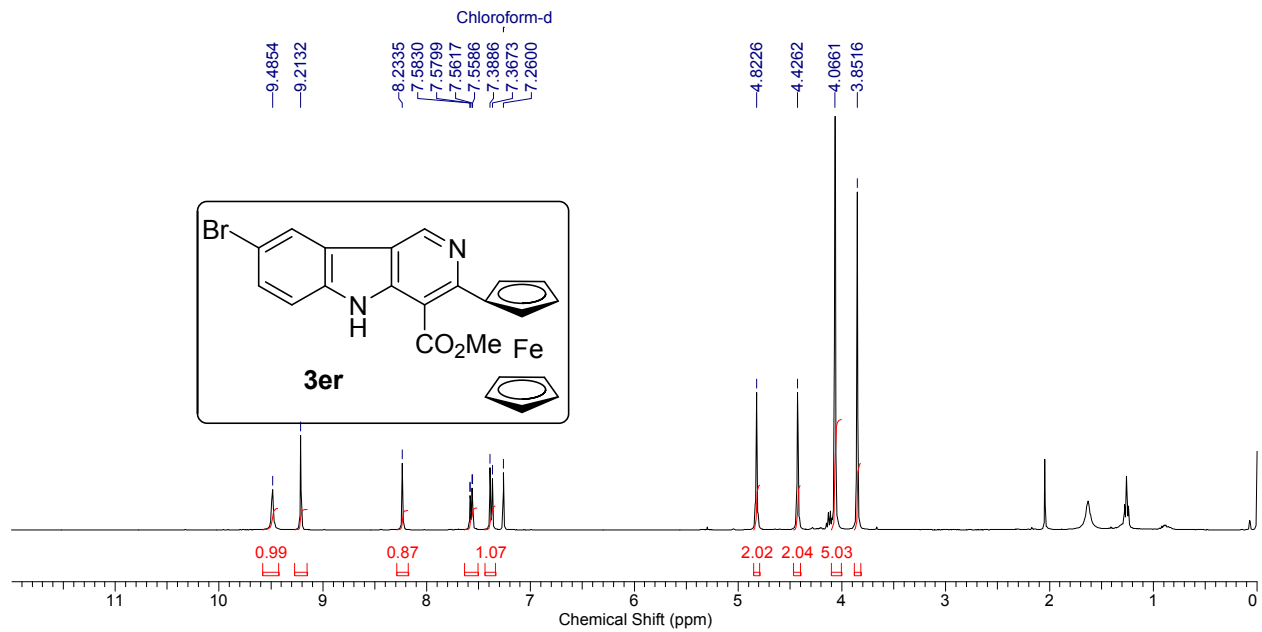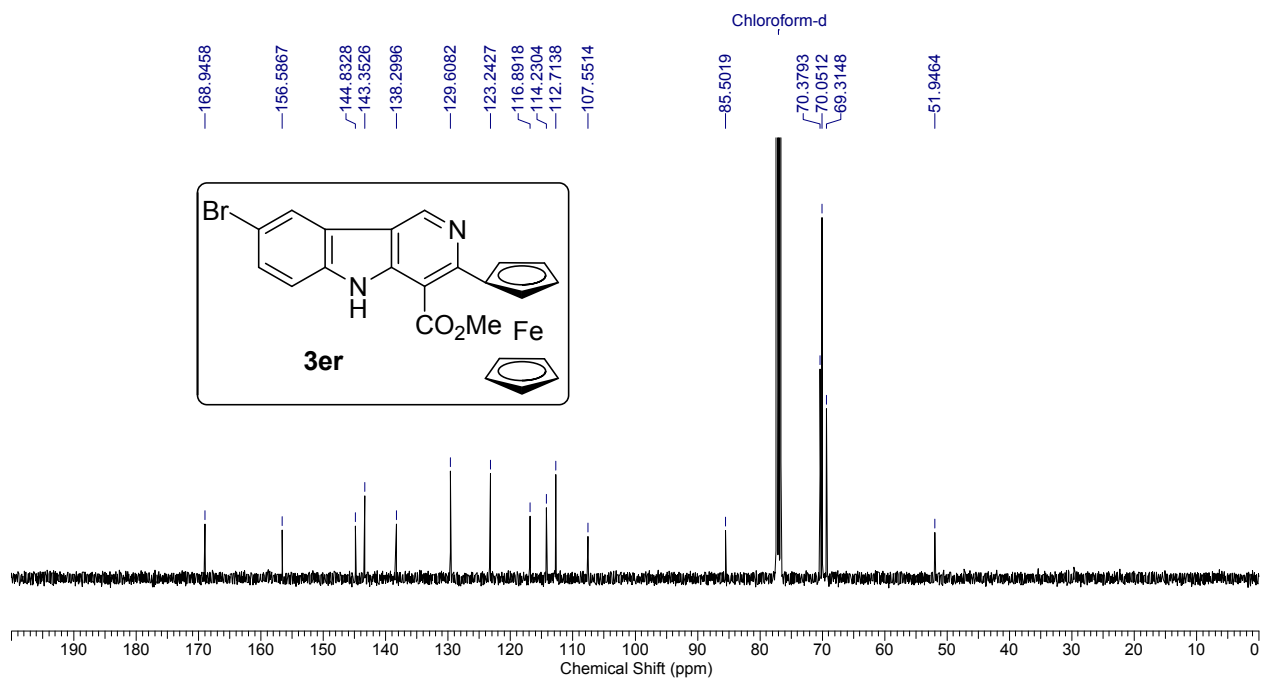



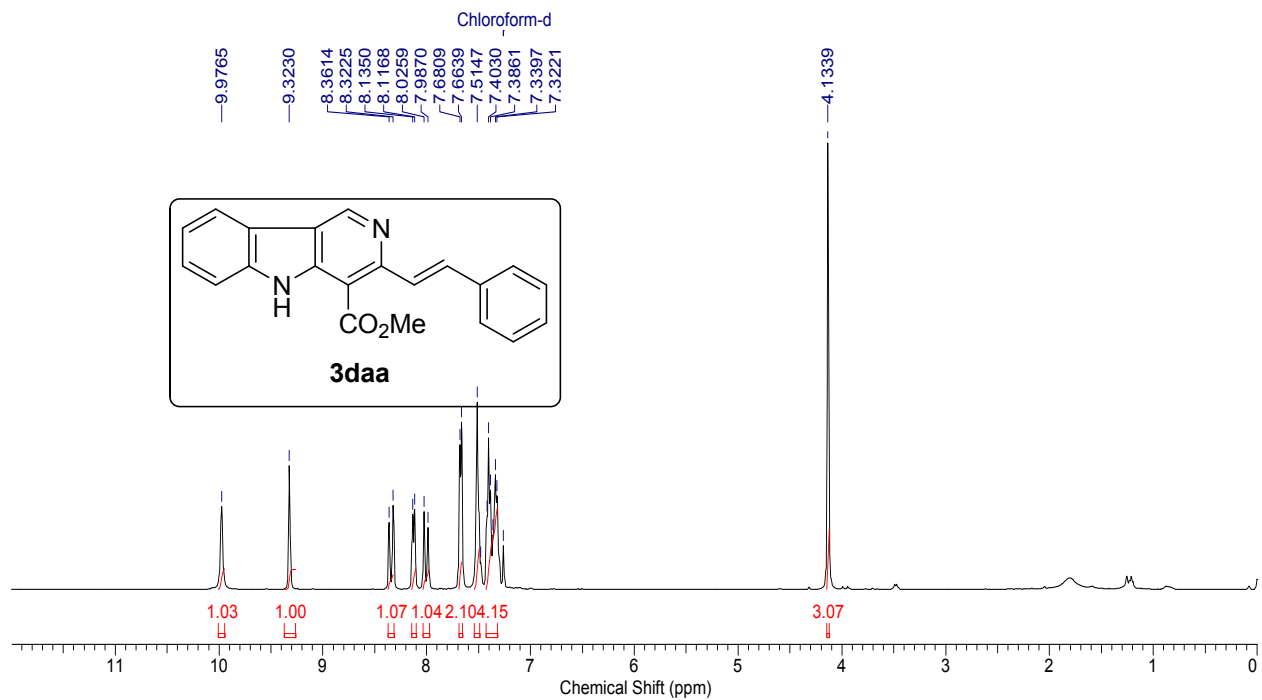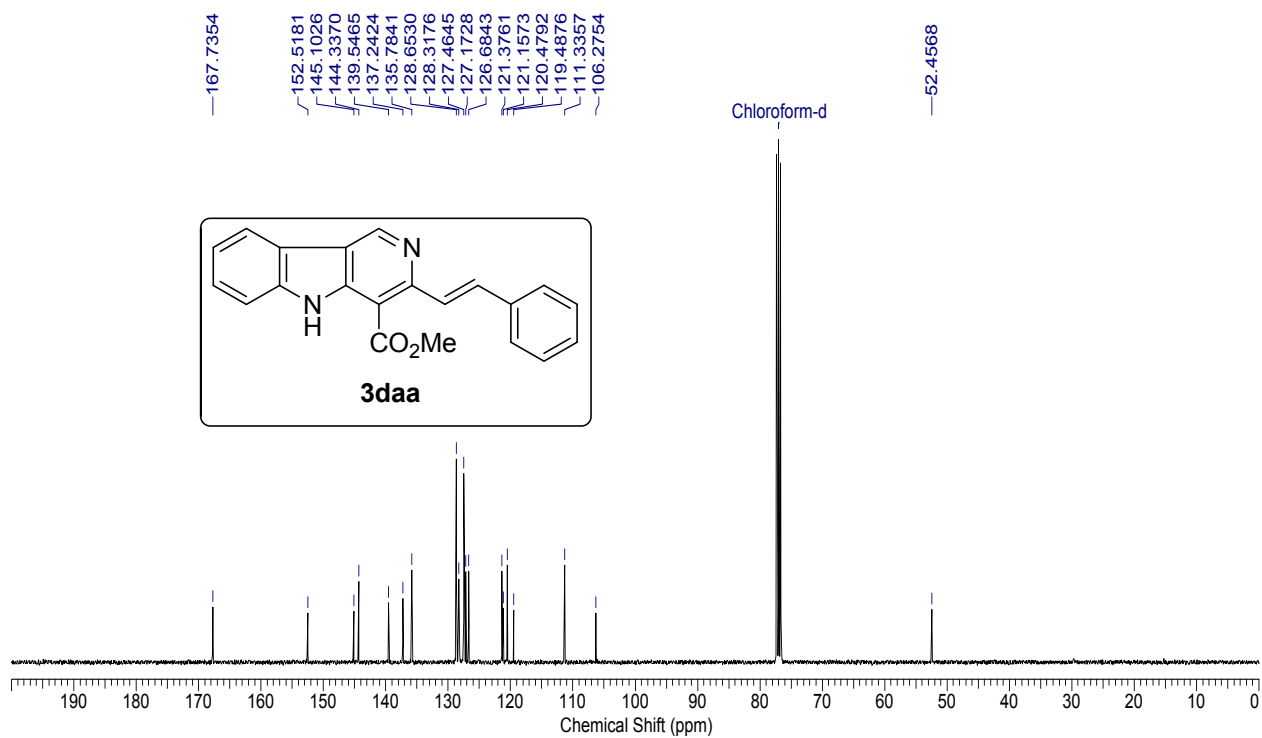

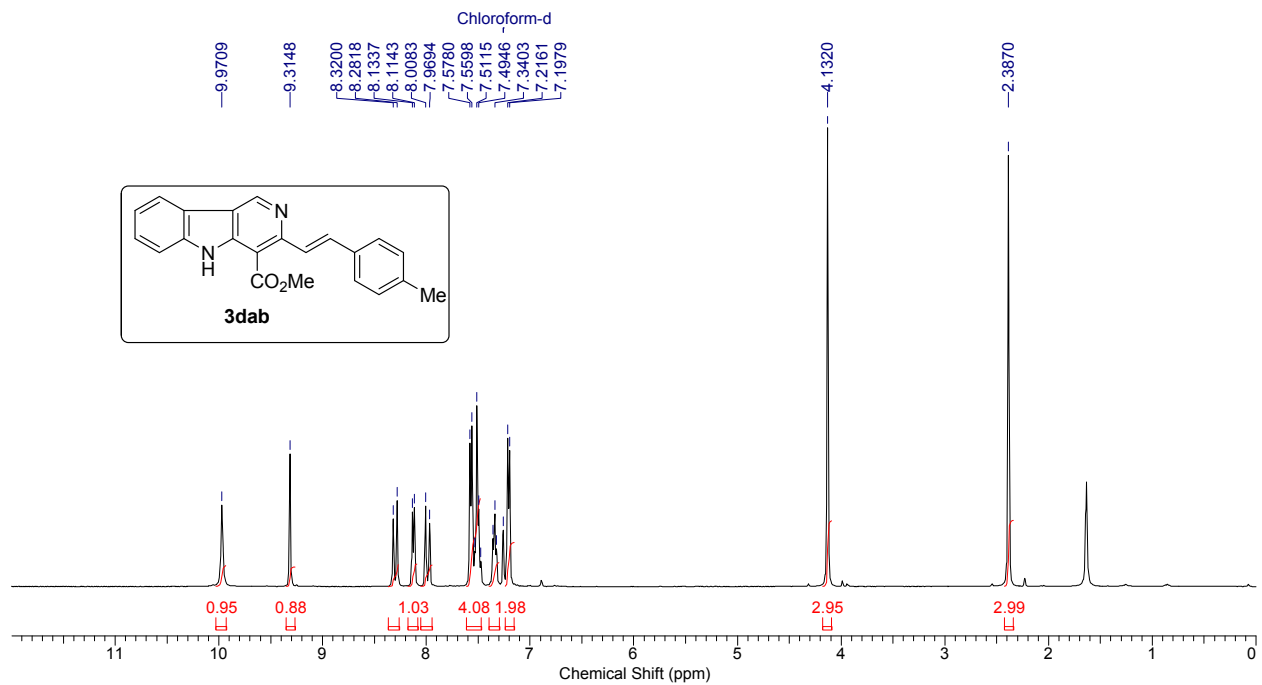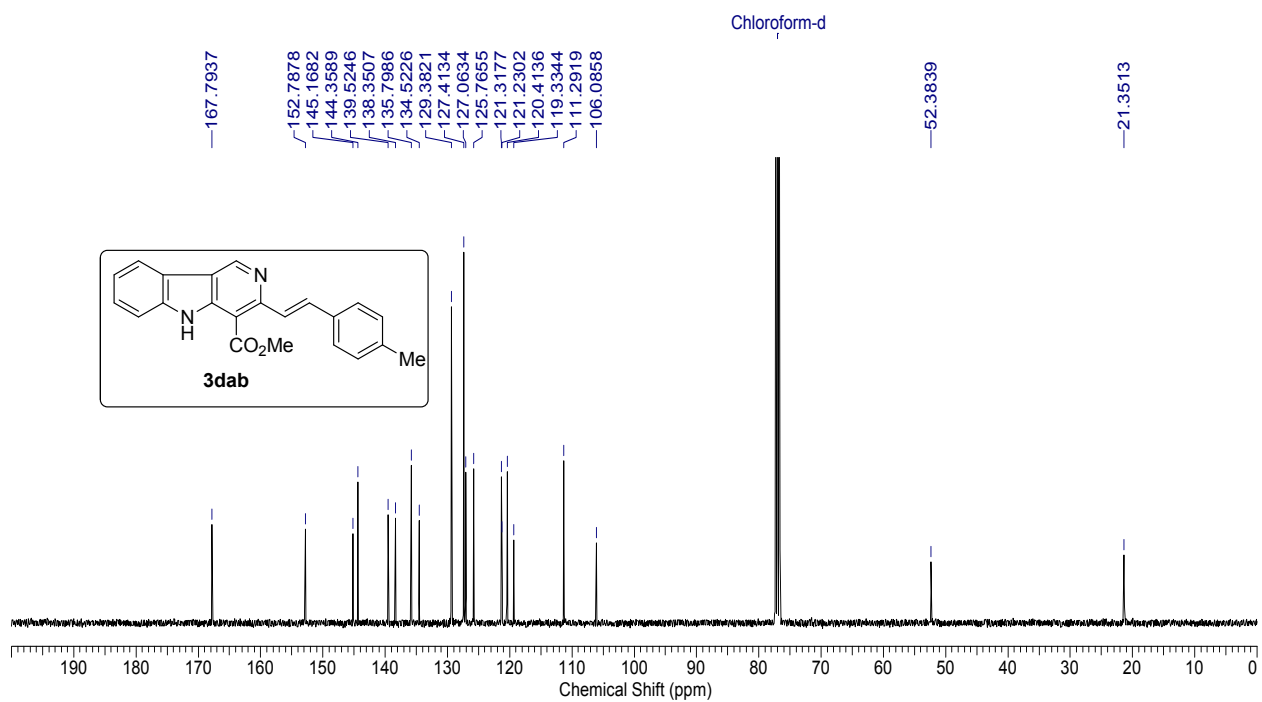

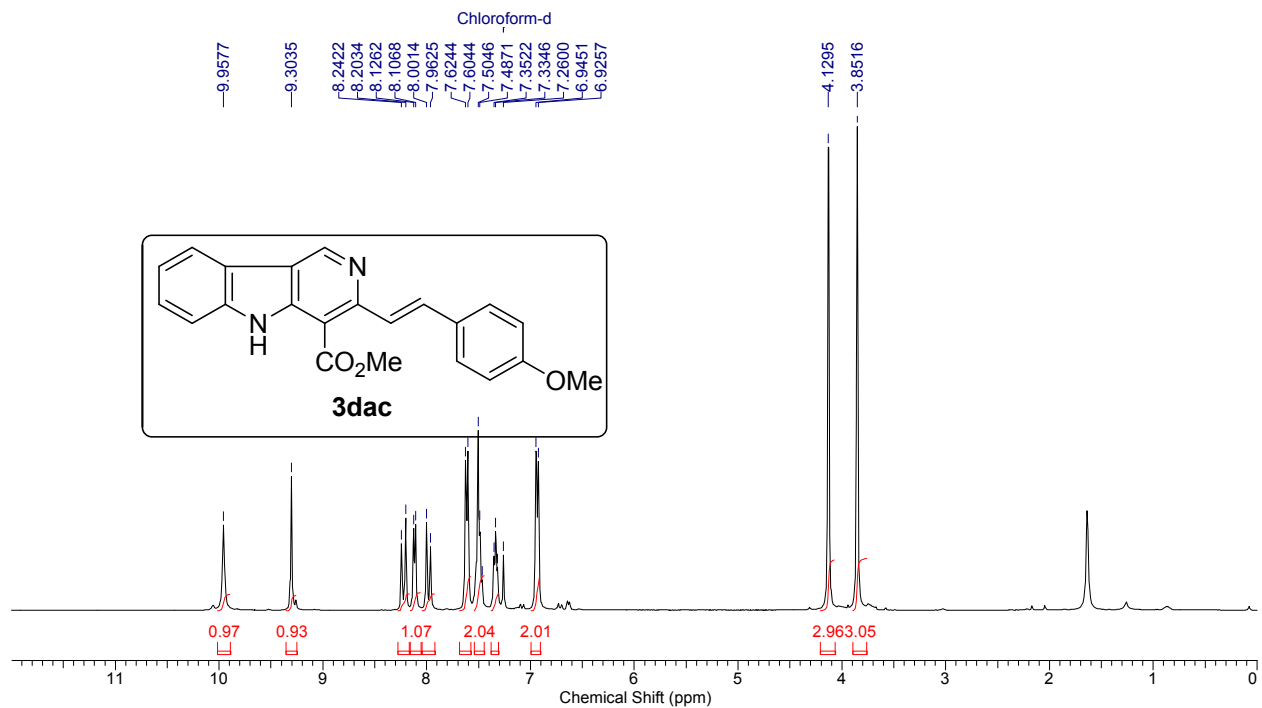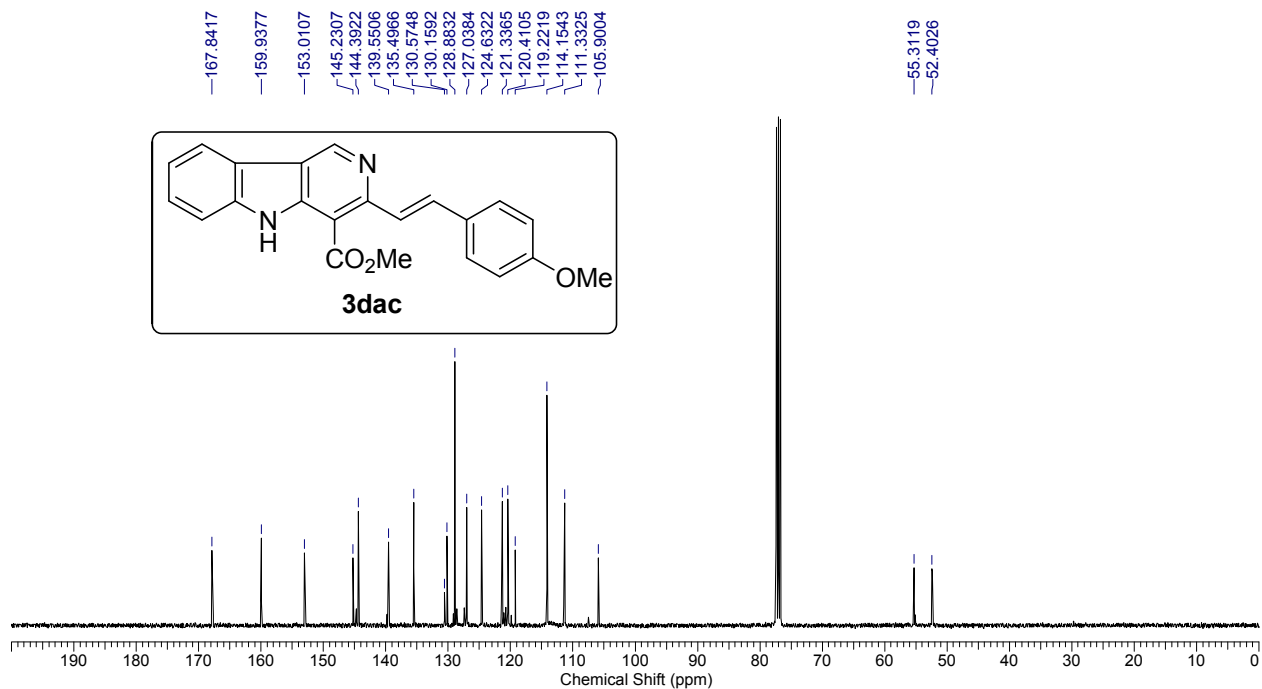

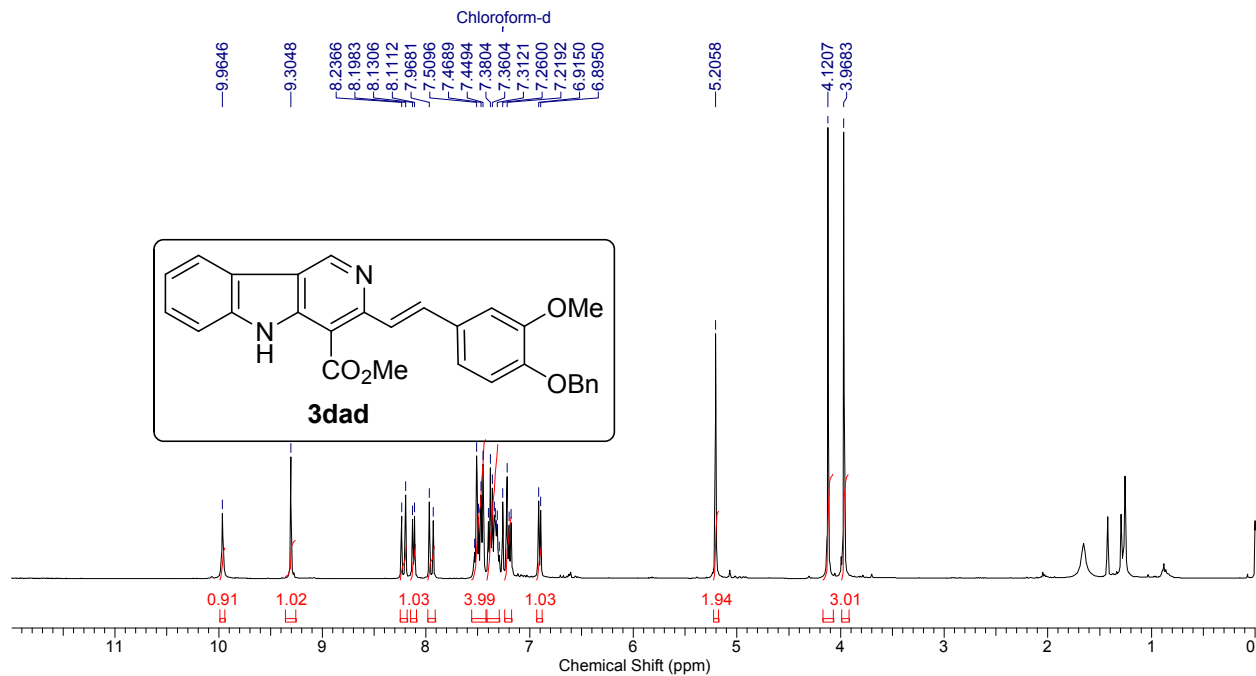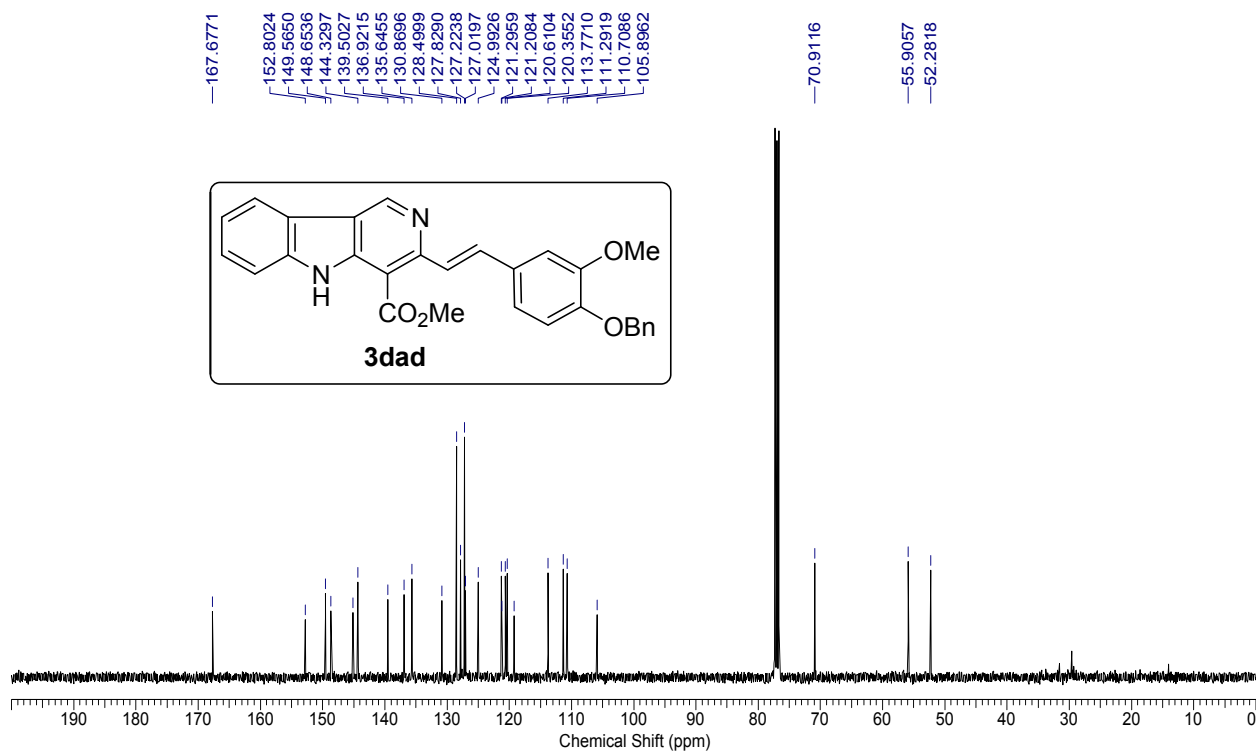

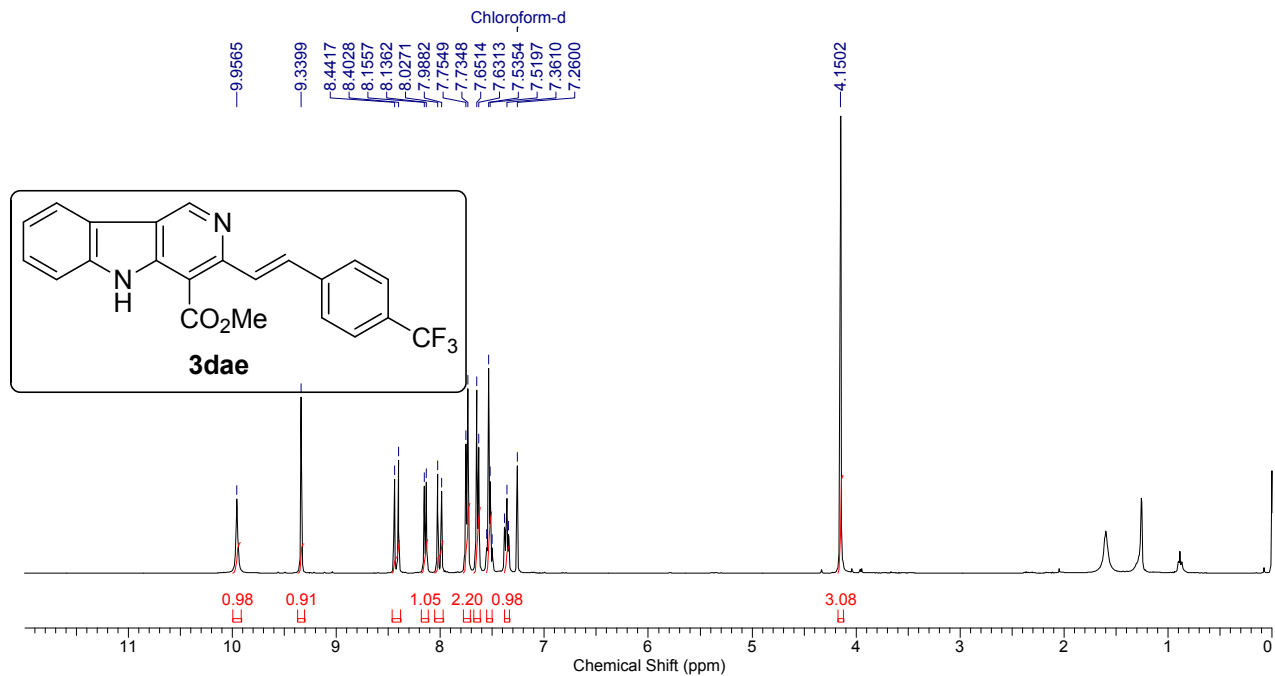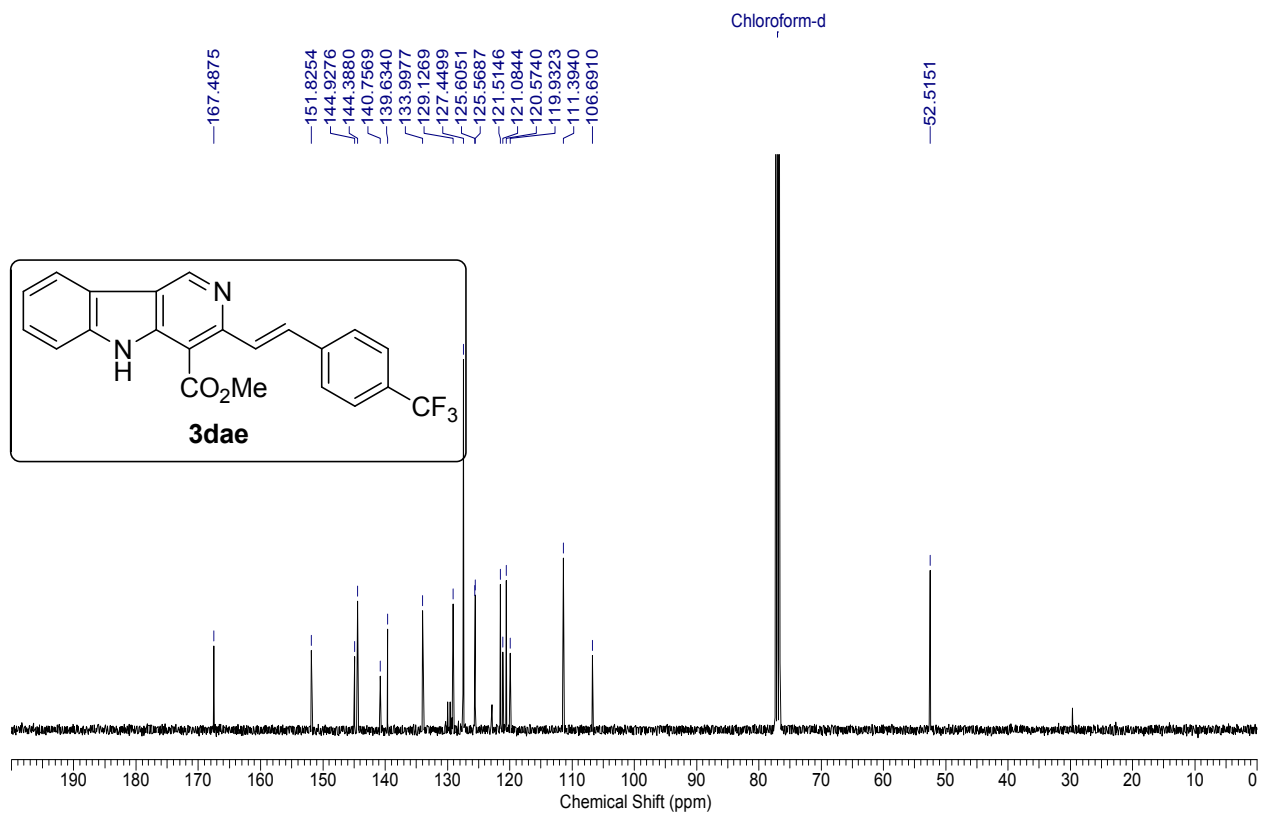

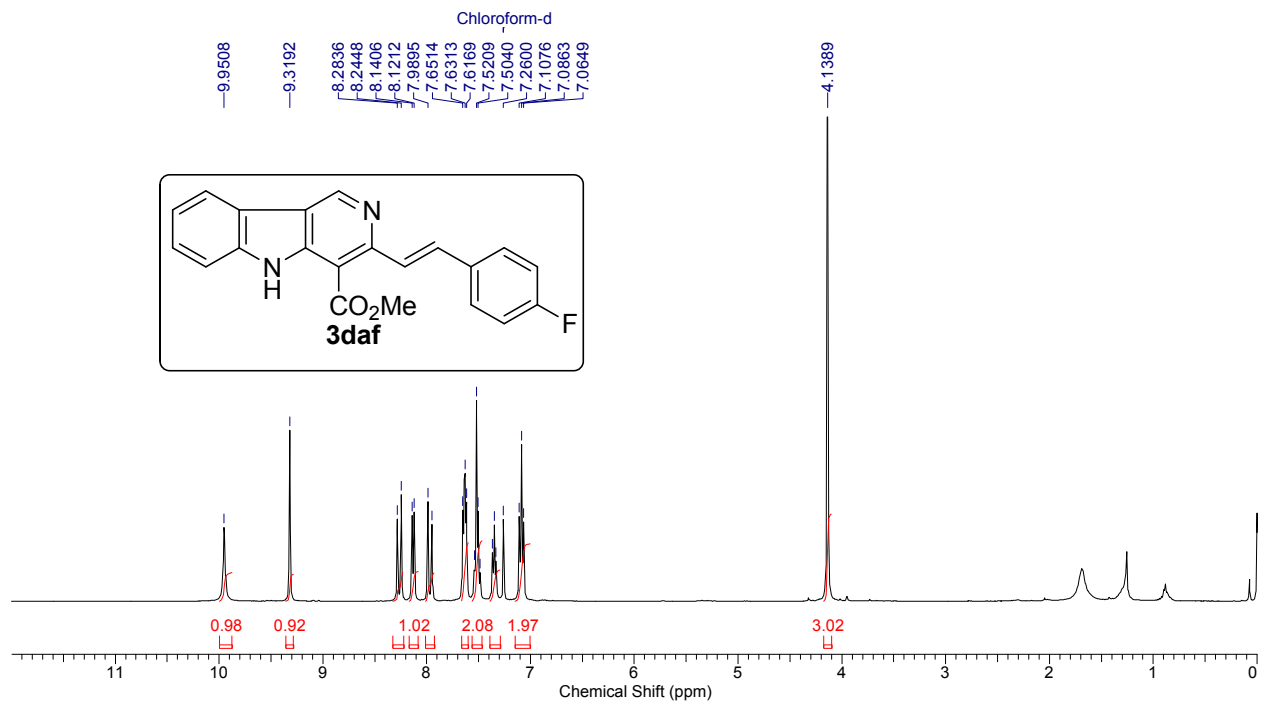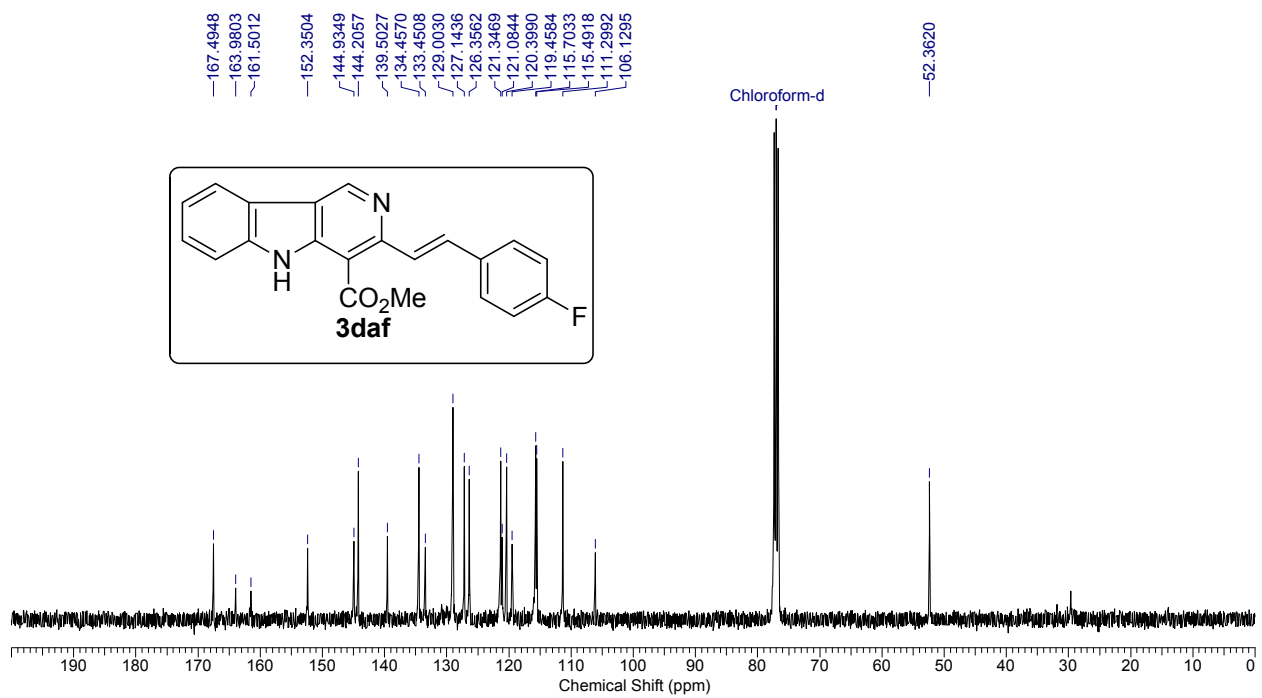

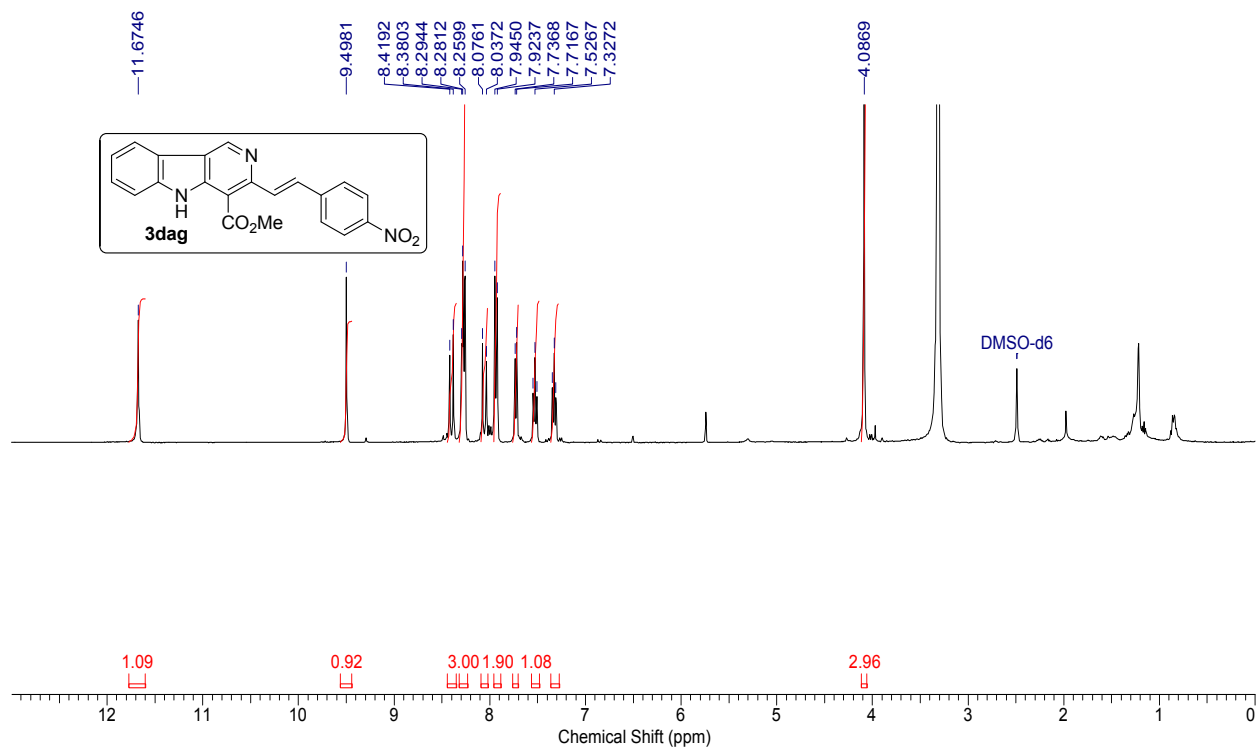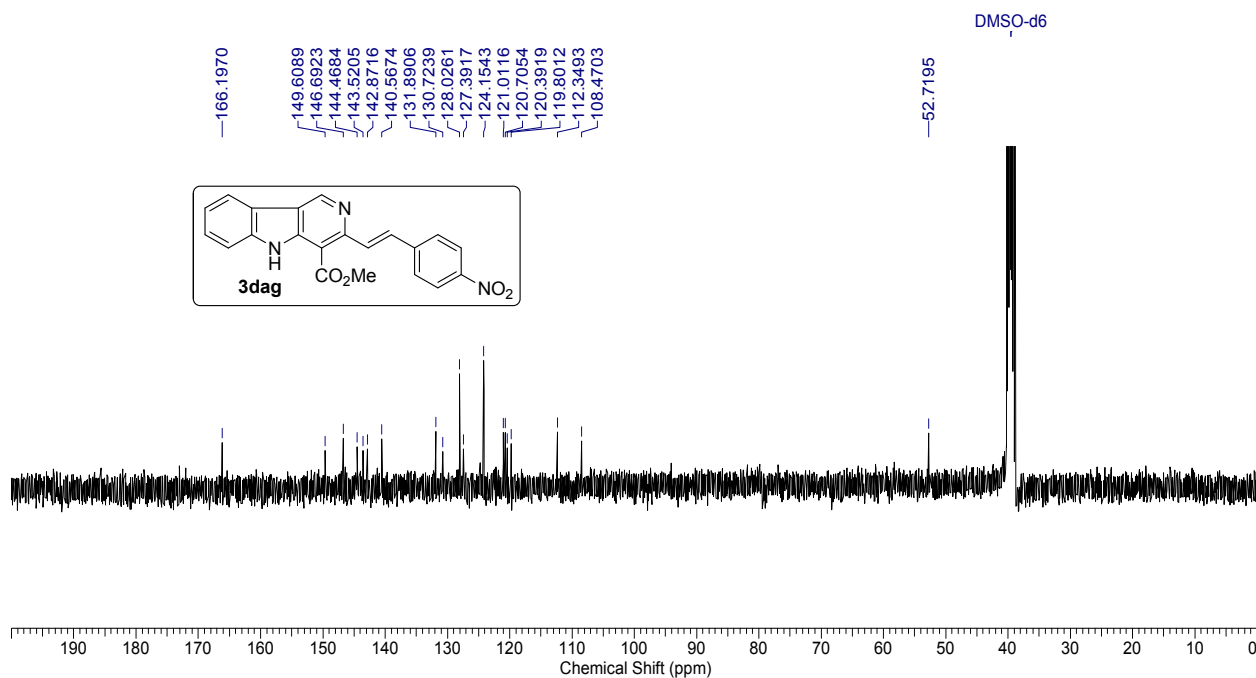

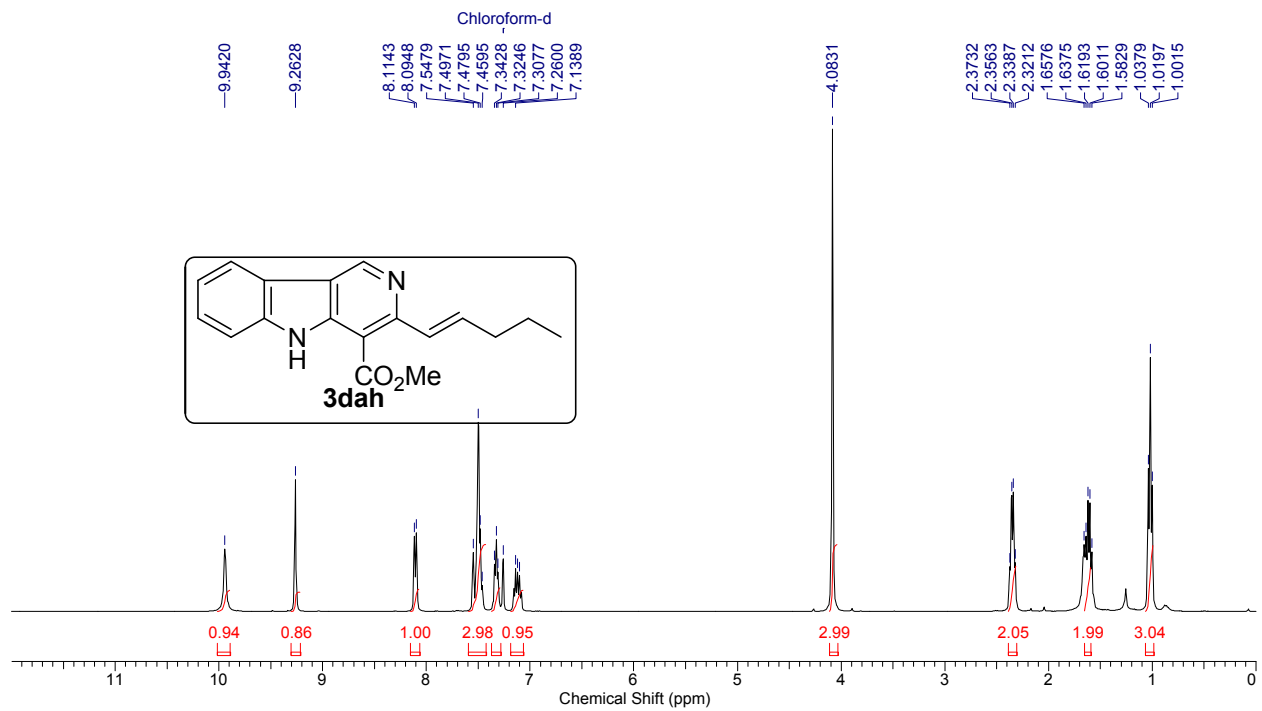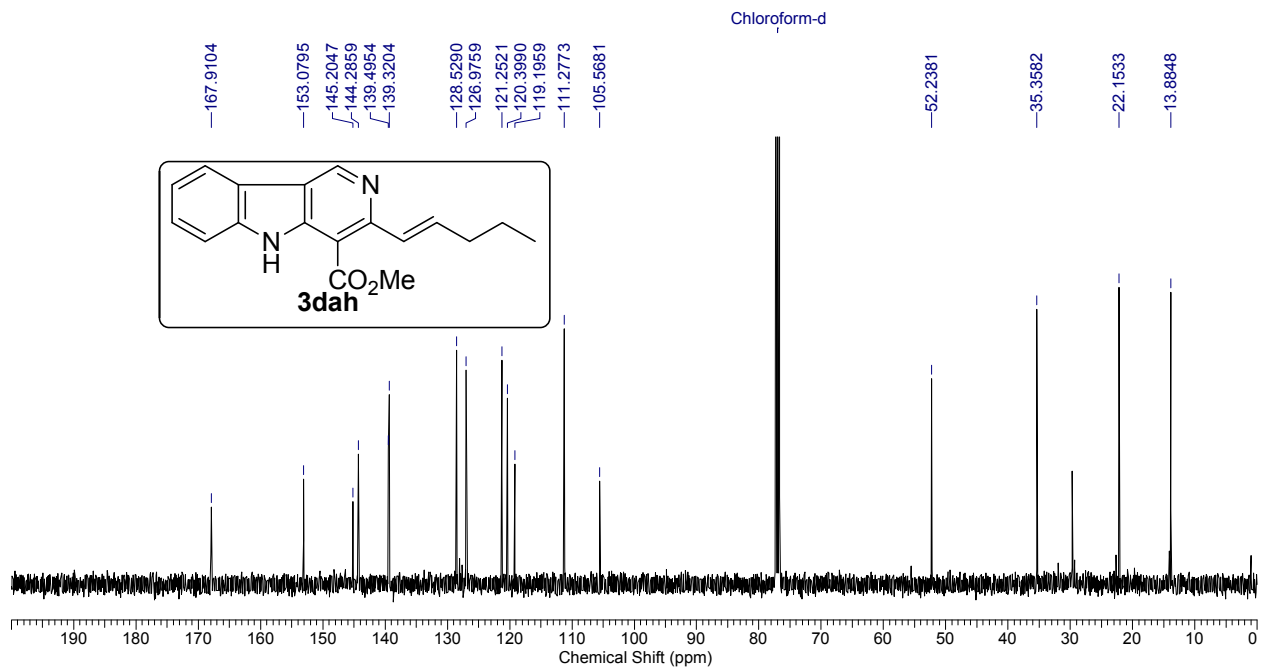



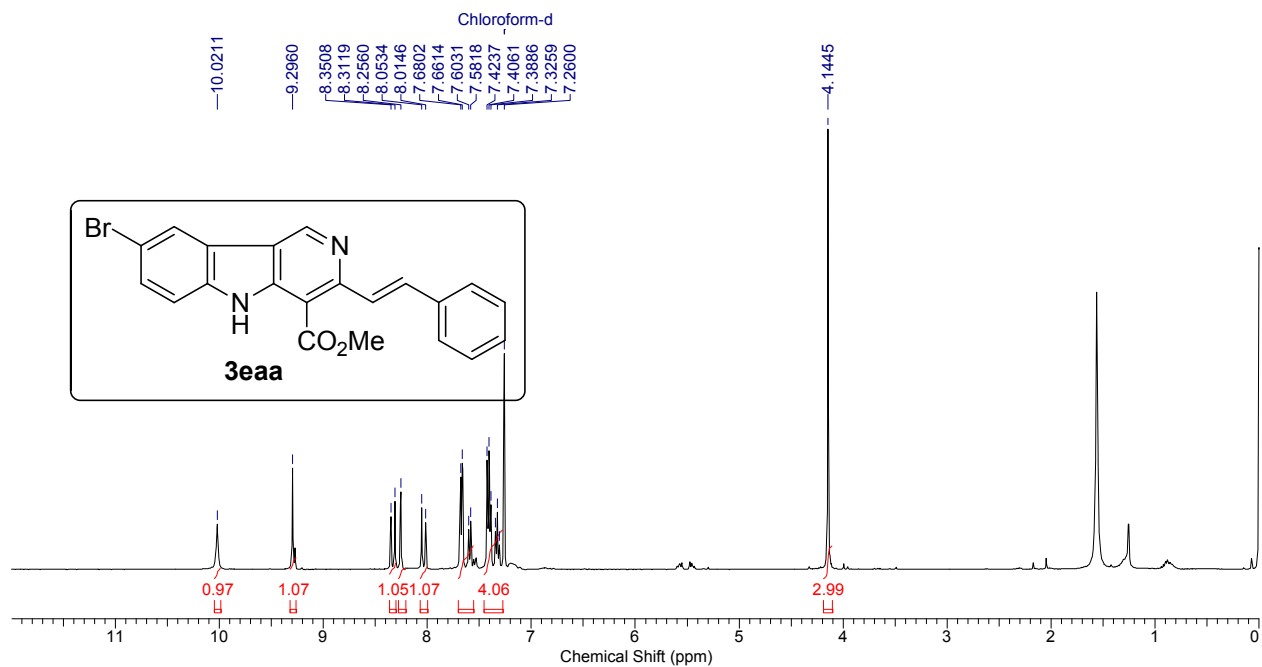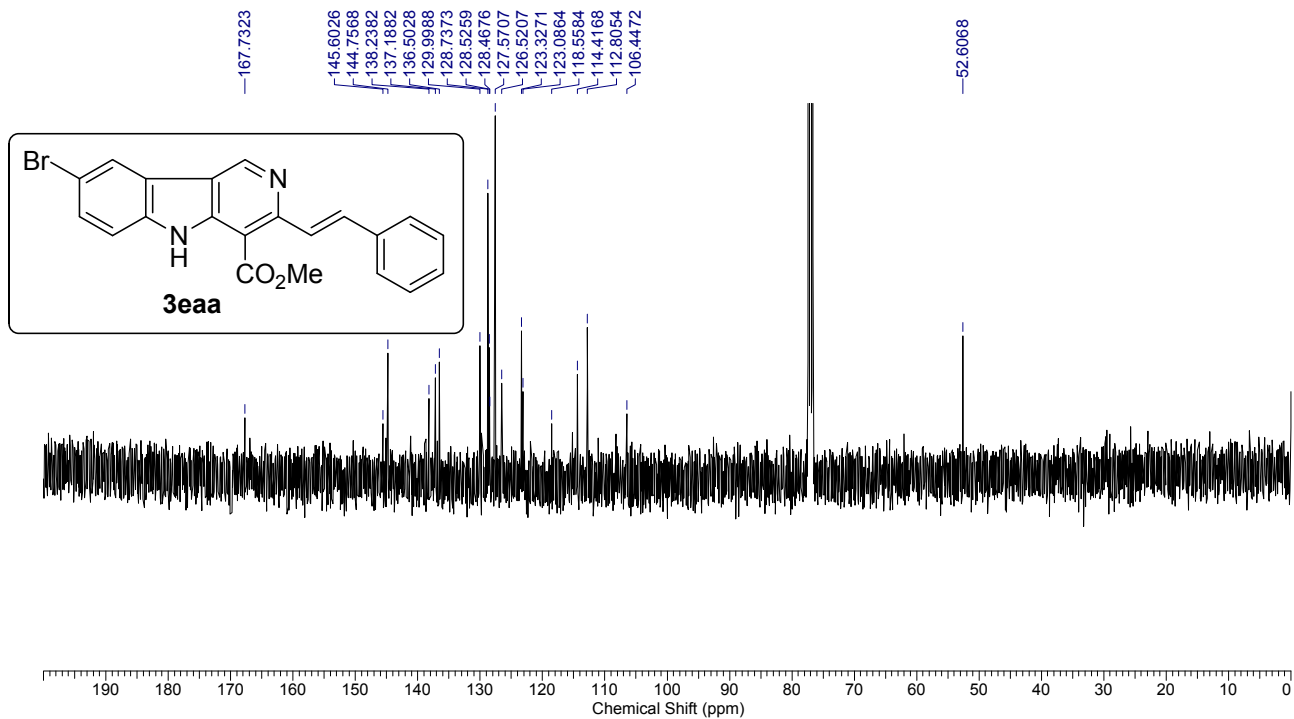

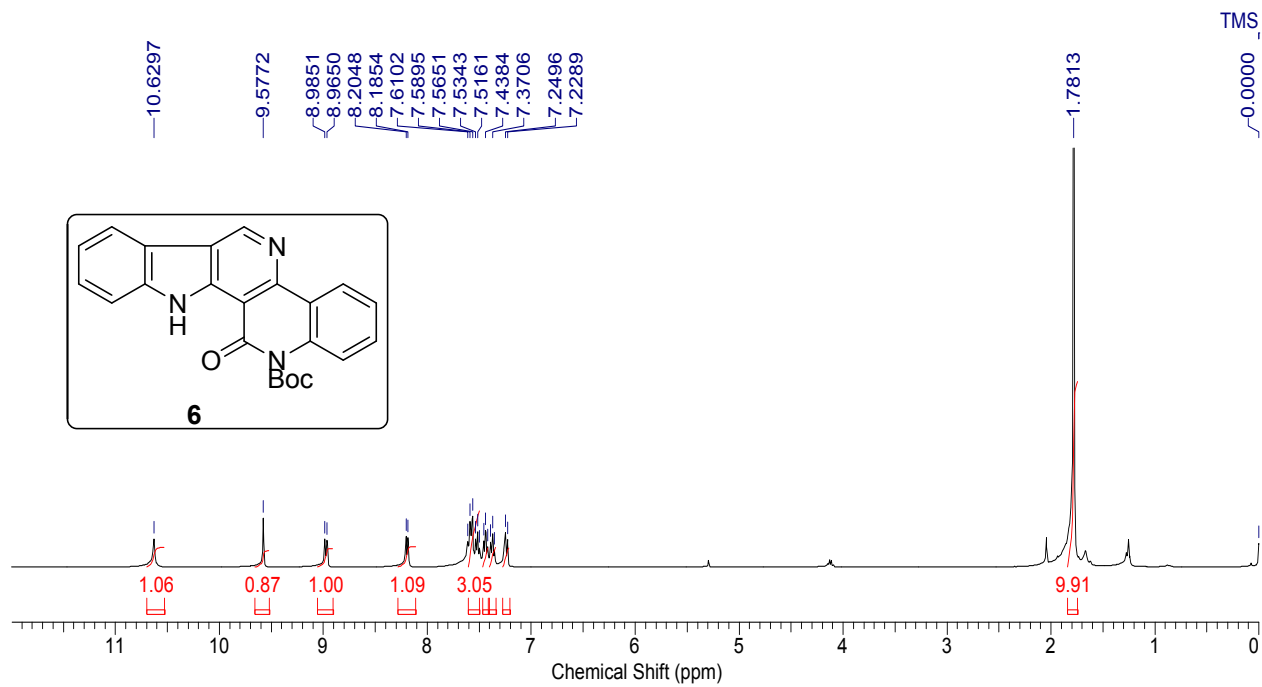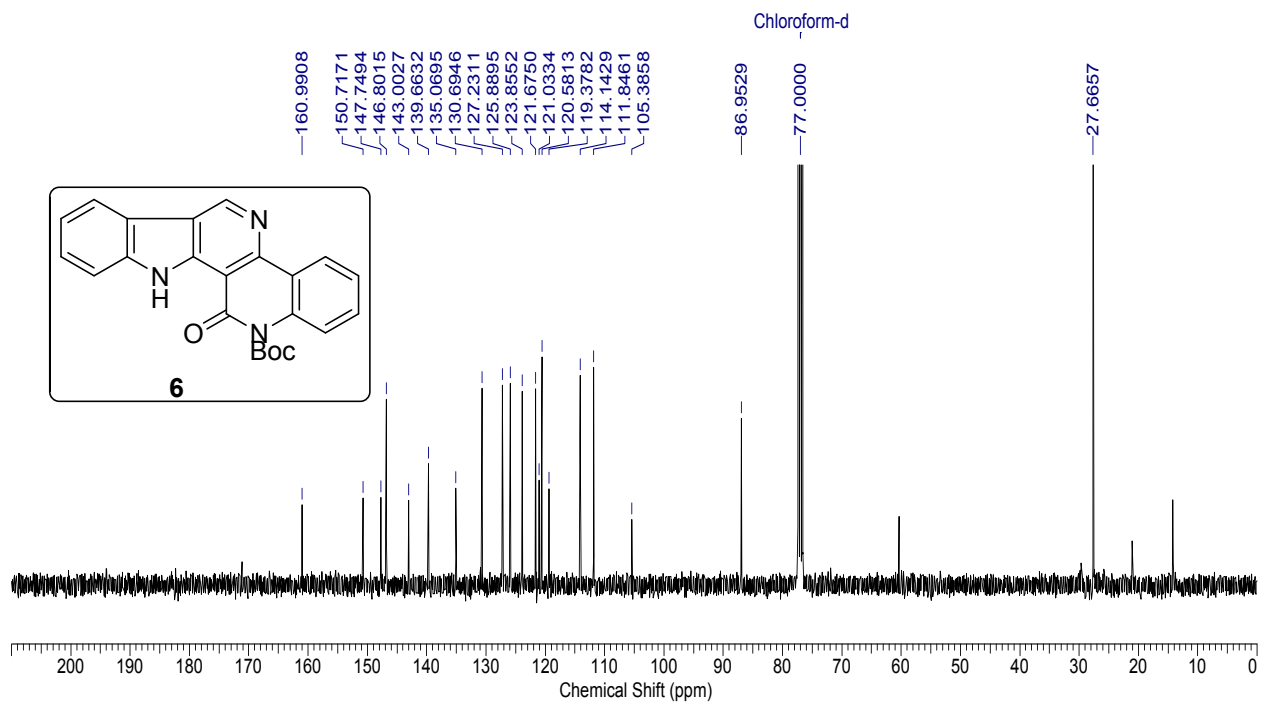

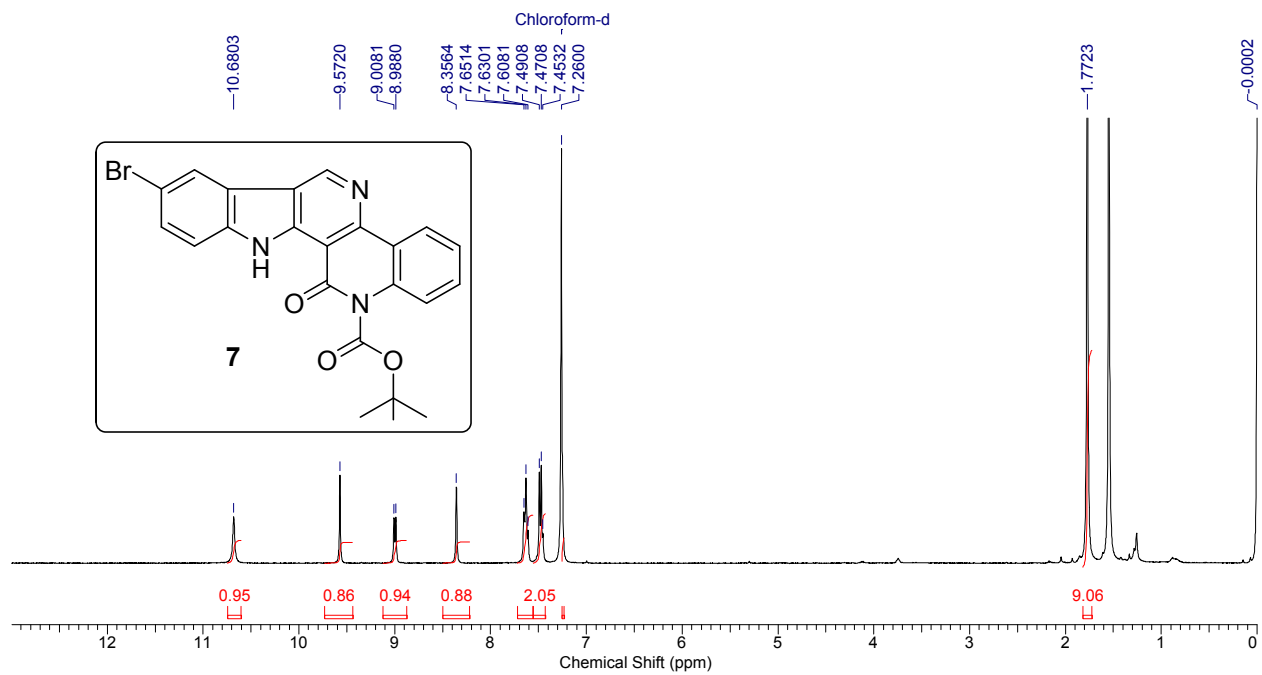

Supplement: c5ra08422a1.pdf [file c5ra08422a1.pdf]
